# Supplementary material for: Base-tuned selective 1,2-dichloromethylhydroxylation and 1,2-peroxyhydroxylation of 1,3-dienes via a tandem radical process
Source: Royal Society of Chemistry journal article supplement (doi:10.1039/d3cc02337k), 2023-01-01

## **Base-tuned selective 1,2-dichloromethylhydroxylation and 1,2-peroxyhydroxylation of 1,3-dienes *via* tandem radical process**

Jiantao Zhang, Weiming Zhu, Peng Zhou\*, Cui Chen and Weibing Liu\*

College of Chemistry, Guangdong University of Petrochemical Technology, Guandu Road, Maoming, 525000, P. R. China

## General Information

The substrates of 1,3-dienes **1** were synthesized according to the literature.<sup>[1-2]</sup> <sup>1</sup>H, <sup>13</sup>C NMR spectra were recorded on a Bruker AVANCE 400 (400 MHz for <sup>1</sup>H; 100 MHz for <sup>13</sup>C), <sup>1</sup>H NMR and <sup>13</sup>C NMR chemical shifts were determined relative to internal standard TMS at  $\delta$  0.0. Chemical shifts ( $\delta$ ) are reported in ppm, and coupling constants ( $J$ ) are in Hertz (Hz). The following abbreviations were used to explain the multiplicities: s = singlet, d = doublet, t = triplet, q = quartet, m = multiplet. Mass spectra were obtained using *ESI* mass spectrometer. All reagents were used as received from commercial sources, unless specified otherwise, or prepared as described in the literature.

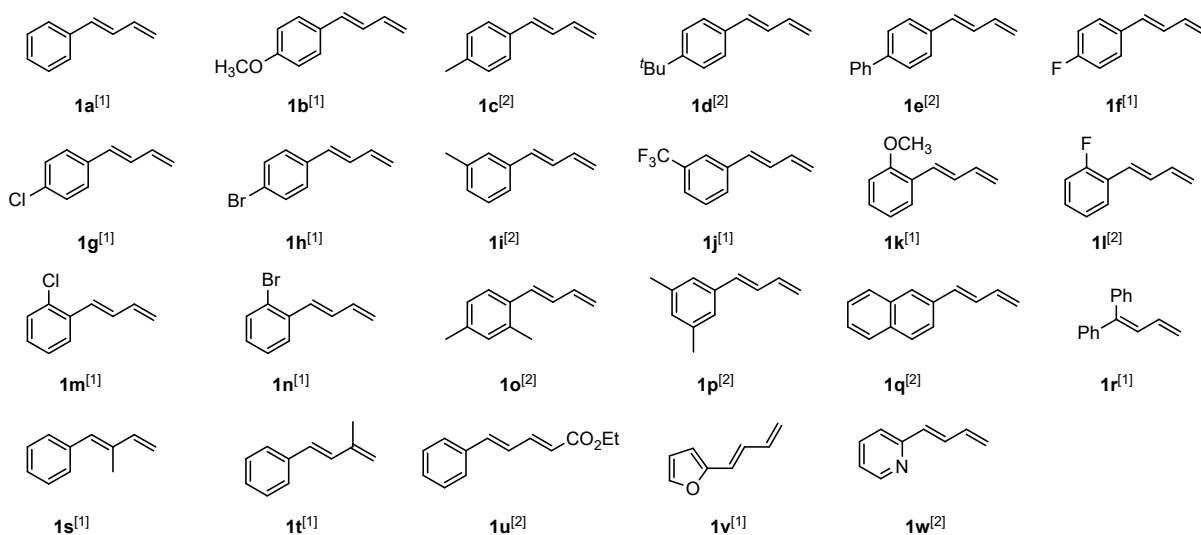

**Table S1 Optimization of the reaction conditions<sup>a</sup>**

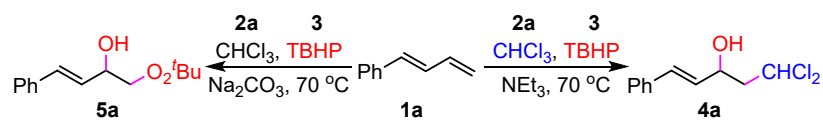

| Entry                 | Base                                | Solvent            | 3/equiv.   | 4a/%                  | 5a/%                  |
|-----------------------|-------------------------------------|--------------------|------------|-----------------------|-----------------------|
| 1                     | NEt <sub>3</sub>                    | CHCl <sub>3</sub>  | 2.0        | 23                    | -                     |
| 2                     | NEt <sub>3</sub>                    | CHCl <sub>3</sub>  | 3.0        | 49                    | -                     |
| <b>3</b>              | <b>NEt<sub>3</sub></b>              | CHCl <sub>3</sub>  | <b>4.0</b> | <b>72<sup>b</sup></b> | -                     |
| 4                     | NEt <sub>3</sub>                    | CHCl <sub>3</sub>  | 5.0        | 70                    | -                     |
| 5                     | NEt <sub>3</sub>                    | CHCl <sub>3</sub>  | 8.0        | 65                    | -                     |
| 6 <sup>c</sup>        | NEt <sub>3</sub>                    | CHCl <sub>3</sub>  | 4.0        | <5                    | -                     |
| 7 <sup>d</sup>        | DABCO                               | CHCl <sub>3</sub>  | 4.0        | -                     | 35                    |
| 8 <sup>d</sup>        | DMAP                                | CHCl <sub>3</sub>  | 4.0        | -                     | 10                    |
| 9 <sup>d</sup>        | DBU                                 | CHCl <sub>3</sub>  | 4.0        | -                     | <5                    |
| 10 <sup>d</sup>       | <sup>t</sup> BuOK                   | CHCl <sub>3</sub>  | 4.0        | -                     | 52                    |
| 11 <sup>d</sup>       | pyridine                            | CHCl <sub>3</sub>  | 4.0        | -                     | 40                    |
| <b>12<sup>d</sup></b> | <b>Na<sub>2</sub>CO<sub>3</sub></b> | CHCl <sub>3</sub>  | <b>4.0</b> | -                     | <b>67<sup>b</sup></b> |
| 13 <sup>e</sup>       | Na <sub>2</sub> CO <sub>3</sub>     | CHCl <sub>3</sub>  | 4.0        | -                     | 64                    |
| 14 <sup>f</sup>       | Na <sub>2</sub> CO <sub>3</sub>     | CHCl <sub>3</sub>  | 4.0        | -                     | 65                    |
| 15                    | -                                   | CHCl <sub>3</sub>  | 4.0        | -                     | -                     |
| 16                    | Na <sub>2</sub> CO <sub>3</sub>     | CH <sub>3</sub> CN | 4.0        | -                     | 45                    |
| 17                    | Na <sub>2</sub> CO <sub>3</sub>     | PhMe               | 4.0        | -                     | 59                    |
| 18                    | Na <sub>2</sub> CO <sub>3</sub>     | DMF                | 4.0        | -                     | 35                    |
| 19                    | Na <sub>2</sub> CO <sub>3</sub>     | DMSO               | 4.0        | -                     | 40                    |
| 20                    | Na <sub>2</sub> CO <sub>3</sub>     | PhCl               | 4.0        | -                     | 43                    |

<sup>a</sup> Unless other noted, the reaction was performed in air by using **1a** (0.5 mmol), **2a** (0.5 mL), TBHP (2.0 mmol) in NEt<sub>3</sub> (0.5 mL) at 70 °C for 12 h. <sup>b</sup> Isolated yield. <sup>c</sup> The reaction was performed at room temperature for 24 h. <sup>d</sup> 2.0 equiv. of base was employed, and CHCl<sub>3</sub> was used as solvent. <sup>e</sup> 3.0 equiv. of Na<sub>2</sub>CO<sub>3</sub> was used. <sup>f</sup> 4.0 equiv. of Na<sub>2</sub>CO<sub>3</sub> was used. TBHP (70% solution in water). DABCO: 1,4-Diazabicyclo[2.2.2]octane; DMAP: 4-dimethylaminopyridine; DBU: 1,8-diazabicyclo[5.4.0]undec-7-ene.

## General Procedure for Products 4.

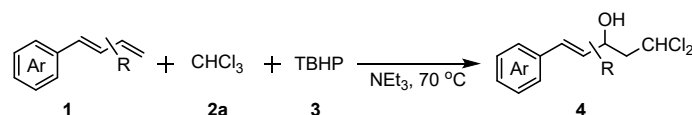

To a solution of **1** (0.5 mmol) in NEt<sub>3</sub> (0.5 mL) was added CHCl<sub>3</sub> (0.5 mL) and TBHP (2.0 mmol) at room temperature. Then the solution mixture was stirred at 70 °C for 12 h, after completion of the reaction, the solvent was removed under reduced pressure and the crude product was subjected to silica gel column chromatography to afford **4**.

## Characterization Data of Products.

(*E*)-5,5-dichloro-1-phenylpent-1-en-3-ol (**4a**): Yield: 72%, yellow oil liquid; R<sub>f</sub> = 0.37 (EtOAc/petroleum ether = 1/20). <sup>1</sup>H NMR (400 MHz, CDCl<sub>3</sub>) δ 7.39 (dd, *J* = 8.3, 1.3 Hz, 2H), 7.36 – 7.31 (m, 2H), 7.28 (dt, *J* = 5.3, 2.1 Hz, 1H), 6.66 (d, *J* = 15.9 Hz, 1H), 6.20 (dd, *J* = 15.9, 6.9 Hz, 1H), 5.96 (dd, *J* = 8.9, 4.4 Hz, 1H), 4.57 (s, 1H), 2.60 – 2.49 (m, 1H), 2.43 (m, 1H), 1.86 (s, 1H). <sup>13</sup>C NMR (100 MHz, CDCl<sub>3</sub>) δ 136.0, 131.8, 130.0, 128.7, 128.2, 126.6, 70.5, 70.0, 50.5. HRMS (*ESI*) *m/z*: [M+Cl]<sup>-</sup> Calcd for C<sub>11</sub>H<sub>12</sub>Cl<sub>2</sub>O<sup>-</sup> 264.9959; Found 265.0267.

(*E*)-5,5-dichloro-1-(4-methoxyphenyl)pent-1-en-3-ol (**4b**): Yield: 78%, yellow oil liquid; R<sub>f</sub> = 0.35 (EtOAc/petroleum ether = 1/15). <sup>1</sup>H NMR (400 MHz, CDCl<sub>3</sub>) δ 7.39 – 7.30 (m, 2H), 6.99 – 6.79 (m, 2H), 6.61 (d, *J* = 15.8 Hz, 1H), 6.08 (dd, *J* = 15.9, 7.1 Hz, 1H), 5.97 (dd, *J* = 8.8, 4.5 Hz, 1H), 4.64 – 4.48 (m, 1H), 3.84 (s, 3H), 2.55 (ddd, *J* = 13.6, 6.7, 2.9 Hz, 1H), 2.48 – 2.34 (m, 1H). <sup>13</sup>C NMR (100 MHz, CDCl<sub>3</sub>) δ 159.6, 131.5, 128.7, 127.8, 127.7, 114.1, 70.6, 70.2, 55.3, 50.6. HRMS (*ESI*) *m/z*: [M+Cl]<sup>-</sup> Calcd for C<sub>12</sub>H<sub>14</sub>Cl<sub>2</sub>O<sub>2</sub><sup>-</sup> 295.0163; Found 295.1581.

(*E*)-5,5-dichloro-1-(*p*-tolyl)pent-1-en-3-ol (**4c**): Yield: 74%, yellow oil liquid; R<sub>f</sub> = 0.38 (EtOAc/petroleum ether = 1/20). <sup>1</sup>H NMR (400 MHz, CDCl<sub>3</sub>) δ 7.30 (d, *J* = 8.1 Hz, 2H), 7.17 (d, *J* = 8.0 Hz, 2H), 6.64 (d, *J* = 15.9 Hz, 1H), 6.16 (dd, *J* = 15.9, 7.0 Hz, 1H), 5.97 (dd, *J* = 8.8, 4.5 Hz, 1H), 4.57 (td, *J* = 8.2, 4.2 Hz, 1H), 2.59 – 2.51 (m, 1H), 2.44 (ddd, *J* = 14.3, 8.8, 4.1 Hz, 1H), 2.37 (s, 3H), 1.99 (s, 1H). <sup>13</sup>C NMR (100 MHz, CDCl<sub>3</sub>) δ 138.1, 133.2, 131.8, 129.4, 128.9, 126.5, 70.6, 70.1, 50.5, 25.8, 21.3. HRMS (*ESI*) *m/z*: [M+Cl]<sup>-</sup> Calcd for C<sub>12</sub>H<sub>14</sub>Cl<sub>2</sub>O<sup>-</sup> 279.0116; Found 279.0203.

(*E*)-1-(4-(*tert*-butyl)phenyl)-5,5-dichloropent-1-en-3-ol (**4d**): Yield: 70%, yellow oil liquid; R<sub>f</sub> = 0.40 (EtOAc/petroleum ether = 1/25). <sup>1</sup>H NMR (400 MHz, CDCl<sub>3</sub>) δ 7.42 – 7.38 (m, 2H), 7.37 – 7.33 (m, 2H), 6.66 (d, *J* = 15.8 Hz, 1H), 6.18 (dd, *J* = 15.9, 7.0 Hz, 1H), 5.97 (dd, *J* = 8.8, 4.5 Hz, 1H), 4.64 – 4.45 (m, 1H), 2.55 (ddd, *J* = 13.6, 9.0, 4.5 Hz, 1H), 2.44 (ddd, *J* = 14.4, 8.8, 4.1 Hz, 1H), 1.93 (s, 1H), 1.35 (s, 9H). <sup>13</sup>C NMR (100 MHz, CDCl<sub>3</sub>) δ 151.4, 133.2, 131.6, 129.2, 126.4, 125.6, 70.6, 70.1, 50.5, 34.7, 31.3. HRMS (*ESI*) *m/z*: [M+Cl]<sup>-</sup> Calcd for C<sub>15</sub>H<sub>20</sub>Cl<sub>2</sub>O<sup>-</sup> 321.0585; Found 321.0577.

(*E*)-1-([1,1'-biphenyl]-4-yl)-5,5-dichloropent-1-en-3-ol (**4e**): Yield: 76%, yellow oil liquid; R<sub>f</sub> = 0.37 (EtOAc/petroleum ether = 1/25). <sup>1</sup>H NMR (400 MHz, CDCl<sub>3</sub>) δ 7.66 – 7.57 (m, 4H), 7.47 (t, *J* = 8.2 Hz, 4H), 7.38 (ddd, *J* = 7.4, 3.8, 1.1 Hz, 1H), 6.72 (d, *J* = 15.9 Hz, 1H), 6.27 (dd, *J* = 15.9, 6.9 Hz, 1H), 6.00 (dd, *J* = 8.8, 4.4 Hz, 1H), 4.85 – 4.44 (m, 1H), 2.58 (ddd, *J* = 13.6, 9.1, 4.4 Hz, 1H), 2.47 (ddd, *J* = 14.4, 8.8, 4.0 Hz, 1H), 1.93 (s, 1H). <sup>13</sup>C NMR (100 MHz, CDCl<sub>3</sub>) δ 141.0, 140.5, 135.0, 131.3, 130.0, 128.8, 127.5, 127.4, 127.04, 126.95, 70.6, 70.0, 50.5. HRMS (*ESI*) *m/z*: [M+Cl]<sup>-</sup> Calcd for C<sub>17</sub>H<sub>16</sub>Cl<sub>2</sub>O<sup>-</sup> 341.1575; Found 341.1585.

(*E*)-5,5-dichloro-1-(4-fluorophenyl)pent-1-en-3-ol (**4f**): Yield: 60%, yellow oil liquid; R<sub>f</sub> = 0.37 (EtOAc/petroleum ether = 1/20). <sup>1</sup>H NMR (400 MHz, CDCl<sub>3</sub>) δ 7.48 – 7.31

(m, 2H), 7.16 – 6.95 (m, 2H), 6.64 (d,  $J = 15.9$  Hz, 1H), 6.14 (dd,  $J = 15.9, 6.9$  Hz, 1H), 5.98 (dd,  $J = 8.9, 4.4$  Hz, 1H), 4.67 – 4.49 (m, 1H), 2.55 (ddd,  $J = 13.6, 9.1, 4.4$  Hz, 1H), 2.48 – 2.40 (m, 1H), 1.94 (s, 1H).  $^{13}\text{C}$  NMR (100 MHz,  $\text{CDCl}_3$ )  $\delta$  162.6 (d,  $J = 247.8$  Hz), 132.2 (d,  $J = 3.4$  Hz), 130.6, 129.8 (d,  $J = 2.2$  Hz), 128.2 (d,  $J = 8.1$  Hz), 115.7 (d,  $J = 21.7$  Hz), 70.5, 69.9, 50.5. HRMS (*ESI*)  $m/z$ :  $[\text{M}+\text{Cl}]^-$  Calcd for  $\text{C}_{11}\text{H}_{11}\text{Cl}_3\text{FO}^-$  282.9865; Found 282.9871.

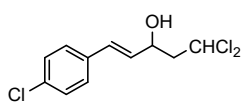

(*E*)-5,5-dichloro-1-(4-chlorophenyl)pent-1-en-3-ol (**4g**): Yield: 64%, yellow oil liquid;  $R_f = 0.37$  (EtOAc/petroleum ether = 1/20).  $^1\text{H}$  NMR (400 MHz,  $\text{CDCl}_3$ )  $\delta$  7.33 (s, 4H), 6.64 (dd,  $J = 15.9, 1.0$  Hz, 1H), 6.20 (dd,  $J = 15.9, 6.8$  Hz, 1H), 5.98 (dd,  $J = 8.9, 4.3$  Hz, 1H), 4.70 – 4.48 (m, 1H), 2.54 (ddd,  $J = 13.6, 9.1, 4.3$  Hz, 1H), 2.44 (ddd,  $J = 14.4, 8.9, 3.9$  Hz, 1H), 1.90 (s, 1H).  $^{13}\text{C}$  NMR (100 MHz,  $\text{CDCl}_3$ )  $\delta$  134.5, 133.8, 130.7, 130.4, 128.9, 127.8, 70.4, 69.8, 50.4. HRMS (*ESI*)  $m/z$ :  $[\text{M}-\text{H}]^-$  Calcd for  $\text{C}_{11}\text{H}_{10}\text{Cl}_3\text{O}^-$  262.9803; Found 262.9805.

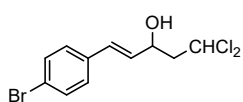

(*E*)-1-(4-bromophenyl)-5,5-dichloropent-1-en-3-ol (**4h**): Yield: 60%, yellow oil liquid;  $R_f = 0.37$  (EtOAc/petroleum ether = 1/20).  $^1\text{H}$  NMR (400 MHz,  $\text{CDCl}_3$ )  $\delta$  7.56 – 7.39 (m, 2H), 7.27 (d,  $J = 9.6$  Hz, 2H), 6.62 (d,  $J = 15.9$  Hz, 1H), 6.22 (ddd,  $J = 15.9, 6.7, 1.4$  Hz, 1H), 6.05 – 5.92 (m, 1H), 4.77 – 4.35 (m, 1H), 4.89 – 4.52 (m, 1H), 2.58 – 2.49 (m, 1H), 2.48 – 2.39 (m, 1H), 1.90 (s, 1H).  $^{13}\text{C}$  NMR (100 MHz,  $\text{CDCl}_3$ )  $\delta$  135.0, 132.5, 131.8, 130.8, 130.5, 128.1, 70.4, 69.8, 50.4. HRMS (*ESI*)  $m/z$ :  $[\text{M}+\text{Cl}]^-$  Calcd for  $\text{C}_{11}\text{H}_{11}\text{BrCl}_3\text{O}^-$  342.9064; Found 342.9061.

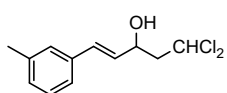

(*E*)-5,5-dichloro-1-(m-tolyl)pent-1-en-3-ol (**4i**): Yield: 70%, yellow oil liquid;  $R_f = 0.37$  (EtOAc/petroleum ether = 1/20).  $^1\text{H}$  NMR (400 MHz,  $\text{CDCl}_3$ )  $\delta$  7.35 – 7.18 (m, 3H), 7.13 (d,  $J = 7.3$  Hz, 1H), 6.64 (d,  $J = 15.9$  Hz, 1H), 6.21 (dd,  $J = 15.9, 7.0$  Hz, 1H), 5.98 (dd,  $J = 8.8, 4.5$  Hz, 1H), 4.58 (td,  $J = 8.0, 4.2$  Hz, 1H), 2.55 (ddd,  $J = 13.6, 9.0, 4.5$  Hz, 1H), 2.49 – 2.41 (m, 1H), 2.39 (s, 3H), 2.09 (s, 1H).  $^{13}\text{C}$  NMR (100 MHz,  $\text{CDCl}_3$ )  $\delta$  138.3, 136.0, 131.9, 129.8, 129.0, 128.6, 127.3, 123.8, 70.6, 70.0, 50.5, 21.4. HRMS (*ESI*)  $m/z$ :  $[\text{M}+\text{Cl}]^-$  Calcd for  $\text{C}_{12}\text{H}_{14}\text{Cl}_3\text{O}^-$  279.0116; Found 279.0139.

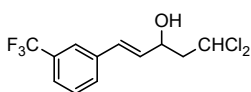

(*E*)-5,5-dichloro-1-(3-(trifluoromethyl)phenyl)pent-1-en-3-ol (**4j**): Yield: 50%, yellow oil liquid;  $R_f = 0.37$  (EtOAc/petroleum ether = 1/20).  $^1\text{H}$  NMR (400 MHz,  $\text{CDCl}_3$ )  $\delta$  7.65 (s, 1H), 7.60 – 7.52 (m, 2H), 7.47 (t,  $J = 7.7$  Hz, 1H), 6.72 (d,  $J = 15.9$  Hz, 1H), 6.31 (dd,  $J = 15.9, 6.5$  Hz, 1H), 5.99 (dd,  $J = 8.9, 4.3$  Hz, 1H), 4.62 (d,  $J = 9.5$  Hz, 1H), 2.55 (ddd,  $J = 13.5, 9.1, 4.3$  Hz, 1H), 2.50 – 2.42 (m, 1H), 2.02 (s, 1H).  $^{13}\text{C}$  NMR (100 MHz,  $\text{CDCl}_3$ )  $\delta$  136.9, 132.1, 131.3, 131.0, 130.1, 129.8, 129.2, 124.6 (q,  $J = 3.7$  Hz), 123.2 (q,  $J = 3.7$  Hz), 70.4, 69.7, 50.4. HRMS (*ESI*)  $m/z$ :  $[\text{M}+\text{Cl}]^-$  Calcd for  $\text{C}_{12}\text{H}_{11}\text{Cl}_3\text{F}_3\text{O}^-$  332.9833; Found 332.9827.

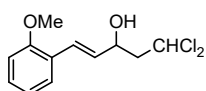

(*E*)-5,5-dichloro-1-(2-methoxyphenyl)pent-1-en-3-ol (**4k**): Yield: 62%, yellow oil liquid;  $R_f = 0.37$  (EtOAc/petroleum ether = 1/15).  $^1\text{H}$  NMR (400 MHz,  $\text{CDCl}_3$ )  $\delta$  7.44 (dd,  $J = 7.6, 1.3$  Hz, 1H), 7.28 (dd,  $J = 15.6, 1.5$  Hz, 1H), 6.98 (dd,  $J = 11.7, 8.2$  Hz, 2H), 6.92 (t,  $J = 8.6$  Hz, 1H), 6.25 (dd,  $J = 16.0, 7.1$  Hz, 1H), 5.99 (dd,  $J = 8.9, 4.4$  Hz, 1H), 4.68 – 4.47 (m, 1H), 3.88 (s, 3H), 2.56 (ddd,  $J = 13.7, 9.1, 4.4$  Hz, 1H), 2.51 – 2.39 (m, 1H), 1.91 (s, 1H).  $^{13}\text{C}$  NMR (100 MHz,  $\text{CDCl}_3$ )  $\delta$  156.9, 130.6, 129.3, 127.1, 126.8, 125.0, 120.7, 110.9, 70.7, 70.5, 55.4, 50.6. HRMS (*ESI*)  $m/z$ :  $[\text{M}+\text{Cl}]^-$  Calcd for  $\text{C}_{12}\text{H}_{14}\text{Cl}_3\text{O}_2^-$  295.0065; Found 295.0068.

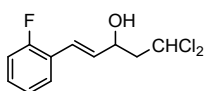

(*E*)-5,5-dichloro-1-(2-fluorophenyl)pent-1-en-3-ol (**4l**): Yield: 53%, yellow oil liquid;  $R_f = 0.37$  (EtOAc/petroleum ether = 1/20).  $^1\text{H}$  NMR (400 MHz,  $\text{CDCl}_3$ )  $\delta$  7.46 (td,  $J = 7.7, 1.6$  Hz, 1H), 7.26 (ddd,  $J = 7.2, 5.5, 1.8$  Hz, 1H), 7.16 – 7.11 (m, 1H), 7.10 – 7.04 (m, 1H), 6.83 (d,  $J = 16.1$  Hz, 1H), 6.32 (dd,  $J = 16.1, 6.7$  Hz, 1H), 5.99 (dd,  $J = 8.9, 4.3$  Hz, 1H), 4.61 (dd,  $J = 15.2, 4.3$  Hz, 1H), 2.55 (ddd,  $J = 13.6, 9.2, 4.3$  Hz, 1H), 2.49 – 2.42 (m, 1H), 1.95 (s, 1H).  $^{13}\text{C}$  NMR (100 MHz,  $\text{CDCl}_3$ )  $\delta$  160.39 (d,  $J = 249.9$  Hz), 132.73 (d,  $J = 5.1$  Hz), 129.43 (d,  $J = 8.5$  Hz), 127.66 (d,  $J = 3.6$  Hz), 124.22 (dd,  $J =$

3.4, 1.0 Hz), 115.87 (d,  $J = 22.0$  Hz), 70.48, 70.10, 50.40. HRMS (*ESI*)  $m/z$ :  $[M+Cl]^-$  Calcd for  $C_{11}H_{11}Cl_3FO^-$  282.9865; Found 282.9873.

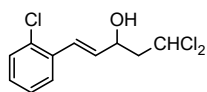

(*E*)-5,5-dichloro-1-(2-chlorophenyl)pent-1-en-3-ol (**4m**): Yield: 59%, yellow oil liquid;  $R_f = 0.37$  (EtOAc/petroleum ether = 1/20).  $^1H$  NMR (400 MHz,  $CDCl_3$ )  $\delta$  7.53 (dd,  $J = 7.2$ , 2.1 Hz, 1H), 7.39 (dd,  $J = 7.4$ , 1.8 Hz, 1H), 7.24 (tt,  $J = 9.3$ , 3.8 Hz, 2H), 7.07 (d,  $J = 15.9$  Hz, 1H), 6.22 (dd,  $J = 15.9$ , 6.7 Hz, 1H), 6.00 (dd,  $J = 8.9$ , 4.3 Hz, 1H), 4.85 – 4.49 (m, 1H), 2.56 (m, 1H), 2.51 – 2.41 (m, 1H), 2.12 (s, 1H).  $^{13}C$  NMR (100 MHz,  $CDCl_3$ )  $\delta$  134.3, 133.3, 133.0, 129.8, 129.1, 127.8, 127.0, 70.5, 69.9, 50.4. HRMS (*ESI*)  $m/z$ :  $[M+Cl]^-$  Calcd for  $C_{11}H_{11}Cl_4O^-$  298.9569; Found 298.9576.

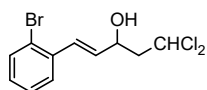

(*E*)-1-(2-bromophenyl)-5,5-dichloropent-1-en-3-ol (**4n**): Yield: 56%, yellow oil liquid;  $R_f = 0.37$  (EtOAc/petroleum ether = 1/20).  $^1H$  NMR (400 MHz,  $CDCl_3$ )  $\delta$  7.59 (dd,  $J = 8.0$ , 1.2 Hz, 1H), 7.52 (dd,  $J = 7.8$ , 1.6 Hz, 1H), 7.32 (d,  $J = 7.3$  Hz, 1H), 7.16 (td,  $J = 7.8$ , 1.6 Hz, 1H), 7.03 (d,  $J = 15.8$  Hz, 1H), 6.17 (dd,  $J = 15.8$ , 6.7 Hz, 1H), 6.00 (dd,  $J = 8.9$ , 4.4 Hz, 1H), 4.79 – 4.47 (m, 1H), 2.56 (ddd,  $J = 13.5$ , 9.1, 4.4 Hz, 1H), 2.47 (ddd,  $J = 14.4$ , 8.9, 4.0 Hz, 1H), 1.95 (s, 1H).  $^{13}C$  NMR (100 MHz,  $CDCl_3$ )  $\delta$  136.0, 133.09, 133.05, 130.5, 129.4, 127.6, 127.2, 123.8, 70.4, 69.8, 50.3. HRMS (*ESI*)  $m/z$ :  $[M+Cl]^-$  Calcd for  $C_{11}H_{11}BrCl_3O^-$  342.9064; Found 342.9073.

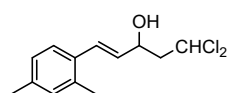

(*E*)-5,5-dichloro-1-(2,4-dimethylphenyl)pent-1-en-3-ol (**4o**): Yield: 52%, yellow oil liquid;  $R_f = 0.37$  (EtOAc/petroleum ether = 1/25).  $^1H$  NMR (400 MHz,  $CDCl_3$ )  $\delta$  7.36 (d,  $J = 8.4$  Hz, 1H), 7.02 (d,  $J = 7.1$  Hz, 2H), 6.87 (d,  $J = 15.7$  Hz, 1H), 6.07 (dd,  $J = 15.7$ , 7.1 Hz, 1H), 5.98 (dd,  $J = 8.8$ , 4.5 Hz, 1H), 4.84 – 4.48 (m, 1H), 2.56 (ddd,  $J = 13.8$ , 9.0, 4.5 Hz, 1H), 2.50 – 2.41 (m, 1H), 2.35 (s, 3H), 2.34 (s, 3H), 1.92 (s, 1H).  $^{13}C$  NMR (100 MHz,  $CDCl_3$ )  $\delta$  137.9, 135.6, 132.2, 131.2, 130.3, 129.6, 127.0, 125.6, 70.6, 70.3, 50.6, 21.1, 19.7. HRMS (*ESI*)  $m/z$ :  $[M+Cl]^-$  Calcd for  $C_{13}H_{16}Cl_3O^-$  293.0821; Found 293.1780.

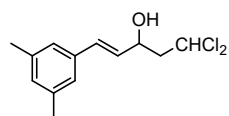

(*E*)-5,5-dichloro-1-(3,5-dimethylphenyl)pent-1-en-3-ol (**4p**): Yield: 62%, yellow oil liquid;  $R_f = 0.37$  (EtOAc/petroleum ether = 1/25).  $^1H$  NMR (400 MHz,  $CDCl_3$ )  $\delta$  7.04 (s, 2H), 6.95 (s, 1H), 6.61 (d,  $J = 15.9$  Hz, 1H), 6.19 (dd,  $J = 15.9$ , 7.0 Hz, 1H), 5.97 (dd,  $J = 8.7$ , 4.5 Hz, 1H), 4.57 (td,  $J = 8.1$ , 4.3 Hz, 1H), 2.55 (ddd,  $J = 13.7$ , 9.0, 4.5 Hz, 1H), 2.49 – 2.40 (m, 1H), 2.34 (s, 6H), 1.95 (s, 1H).  $^{13}C$  NMR (100 MHz,  $CDCl_3$ )  $\delta$  138.2, 135.9, 132.0, 129.9, 129.5, 124.5, 70.6, 70.1, 50.5, 21.3. HRMS (*ESI*)  $m/z$ :  $[M+Cl]^-$  Calcd for  $C_{13}H_{16}Cl_3O^-$  293.0272; Found 293.0280.

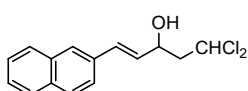

(*E*)-5,5-dichloro-1-(naphthalen-2-yl)pent-1-en-3-ol (**4q**): Yield: 48%, yellow oil liquid;  $R_f = 0.37$  (EtOAc/petroleum ether = 1/25).  $^1H$  NMR (400 MHz,  $CDCl_3$ )  $\delta$  7.92 – 7.80 (m, 3H), 7.77 (s, 1H), 7.60 (dd,  $J = 8.6$ , 1.6 Hz, 1H), 7.50 (ddt,  $J = 11.0$ , 7.4, 3.4 Hz, 2H), 6.84 (d,  $J = 15.9$  Hz, 1H), 6.35 (dd,  $J = 15.9$ , 6.9 Hz, 1H), 6.01 (dd,  $J = 8.8$ , 4.4 Hz, 1H), 4.65 (dt,  $J = 9.8$ , 4.1 Hz, 1H), 2.60 (ddd,  $J = 13.7$ , 9.1, 4.4 Hz, 1H), 2.53 – 2.45 (m, 1H), 1.95 (s, 1H).  $^{13}C$  NMR (100 MHz,  $CDCl_3$ )  $\delta$  133.52, 133.46, 133.2, 131.9, 130.3, 128.4, 128.1, 127.7, 126.9, 126.5, 126.2, 123.4, 70.6, 70.1, 50.6. HRMS (*ESI*)  $m/z$ :  $[M+H]^+$  Calcd for  $C_{15}H_{15}Cl_2O^+$  281.0494; Found 281.0486.

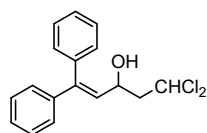

5,5-dichloro-1,1-diphenylpent-1-en-3-ol (**4r**): Yield: 37%, yellow oil liquid;  $R_f = 0.37$  (EtOAc/petroleum ether = 1/25).  $^1H$  NMR (400 MHz,  $CDCl_3$ )  $\delta$  7.46 – 7.37 (m, 3H), 7.32 (dd,  $J = 9.7$ , 4.5 Hz, 3H), 7.29 – 7.25 (m, 2H), 7.23 – 7.17 (m, 2H), 6.07 (dd,  $J = 9.1$ , 1.1 Hz, 1H), 5.92 (m, 1H), 4.53 (td,  $J = 9.0$ , 2.4 Hz, 1H), 2.71 – 2.53 (m, 1H), 2.50 – 2.36 (m, 1H), 1.70 (s, 1H).  $^{13}C$  NMR (100 MHz,  $CDCl_3$ )  $\delta$  145.0, 141.1, 138.6, 129.5, 128.7, 128.5, 128.3, 128.0, 127.9, 127.5, 70.4, 66.7, 50.7. HRMS (*ESI*)  $m/z$ :  $[M+Cl]^-$  Calcd for  $C_{17}H_{16}Cl_3O^-$  341.0272; Found 341.0265.

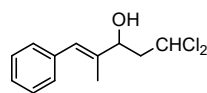

(*E*)-5,5-dichloro-2-methyl-1-phenylpent-1-en-3-ol (**4s**: 4.5/1.0): Yield: 45%, yellow oil liquid;  $R_f = 0.37$  (EtOAc/petroleum ether = 1/20).  $^1H$  NMR (400 MHz,  $CDCl_3$ )  $\delta$  7.38 – 7.32 (m, 2H), 7.27 (d,  $J = 7.2$  Hz, 2H), 7.23 (d,  $J = 7.3$  Hz, 1H), 6.58 (s, 1H), 5.96 (dd,  $J =$

9.1, 4.1 Hz, 1H), 4.45 (d,  $J = 9.1$  Hz, 1H), 2.57 – 2.48 (m, 1H), 2.47 – 2.39 (m, 1H), 1.89 (d,  $J = 1.3$  Hz, 3H), 1.82 (s, 1H).  $^{13}\text{C}$  NMR (100 MHz,  $\text{CDCl}_3$ )  $\delta$  138.5, 136.9, 129.0, 128.7, 128.3, 128.2, 126.9, 126.6, 74.6, 71.1, 49.0, 13.6. HRMS (*ESI*)  $m/z$ :  $[\text{M}-\text{H}]^-$  Calcd for  $\text{C}_{12}\text{H}_{13}\text{Cl}_2\text{O}^-$  243.0349; Found 243.0363.

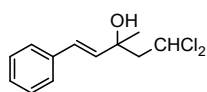

(*E*)-5,5-dichloro-3-methyl-1-phenylpent-1-en-3-ol (**4t**: 5.0/1.0): Yield: 36%, yellow oil liquid;  $R_f = 0.37$  (EtOAc/petroleum ether = 1/20).  $^1\text{H}$  NMR (400 MHz,  $\text{CDCl}_3$ )  $\delta$  7.43 (dd,  $J = 6.6, 5.2$  Hz, 2H), 7.36 (dd,  $J = 10.1, 4.8$  Hz, 2H), 7.31 – 7.27 (m, 1H), 6.69 (d,  $J = 16.0$  Hz, 1H), 6.28 (d,  $J = 16.0$  Hz, 1H), 6.09 – 5.86 (m, 1H), 2.78 – 2.58 (m, 2H), 2.21 (s, 1H), 1.49 (s, 3H).  $^{13}\text{C}$  NMR (100 MHz,  $\text{CDCl}_3$ )  $\delta$  136.36, 134.12, 128.68, 128.39, 127.84, 126.56, 72.56, 69.84, 55.35, 29.40. HRMS (*ESI*)  $m/z$ :  $[\text{M}+\text{Cl}]^-$  Calcd for  $\text{C}_{12}\text{H}_{14}\text{Cl}_3\text{O}^-$  279.0116; Found 279.0157.

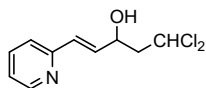

(*E*)-5,5-dichloro-1-(pyridin-2-yl)pent-1-en-3-ol (**4w**): Yield: 42%, yellow oil liquid;  $R_f = 0.35$  (EtOAc/petroleum ether = 1/5).  $^1\text{H}$  NMR (400 MHz,  $\text{CDCl}_3$ )  $\delta$  8.67 – 8.44 (m, 1H), 7.68 (td,  $J = 7.7, 1.8$  Hz, 1H), 7.31 (d,  $J = 7.9$  Hz, 1H), 7.19 (ddd,  $J = 7.5, 4.9, 1.0$  Hz, 1H), 6.88 – 6.60 (m, 2H), 6.03 (dd,  $J = 8.9, 4.3$  Hz, 1H), 4.77 – 4.56 (m, 1H), 2.54 (ddd,  $J = 13.5, 9.2, 4.3$  Hz, 1H), 2.47 (ddd,  $J = 14.5, 9.0, 4.0$  Hz, 1H).  $^{13}\text{C}$  NMR (100 MHz,  $\text{CDCl}_3$ )  $\delta$  154.6, 149.4, 136.9, 135.3, 130.4, 122.6, 122.0, 70.6, 69.1, 50.4. HRMS (*ESI*)  $m/z$ :  $[\text{M}+\text{H}]^+$  Calcd for  $\text{C}_{10}\text{H}_{12}\text{Cl}_2\text{NO}^+$  232.0290; Found 232.0283.

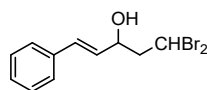

(*E*)-5,5-dibromo-1-phenylpent-1-en-3-ol (**4x**): Yield: 65%, yellow oil liquid;  $R_f = 0.37$  (EtOAc/petroleum ether = 1/20).  $^1\text{H}$  NMR (400 MHz,  $\text{CDCl}_3$ )  $\delta$  7.43 – 7.39 (m, 2H), 7.39 – 7.33 (m, 2H), 7.32 – 7.28 (m, 1H), 6.69 (d,  $J = 15.9$  Hz, 1H), 6.23 (dd,  $J = 15.9, 6.9$  Hz, 1H), 5.88 (dd,  $J = 9.2, 4.6$  Hz, 1H), 4.59 – 4.49 (m, 1H), 2.81 – 2.70 (m, 1H), 2.69 – 2.59 (m, 1H), 1.84 (s, 1H).  $^{13}\text{C}$  NMR (100 MHz,  $\text{CDCl}_3$ )  $\delta$  136.0, 131.9, 129.7, 128.7, 128.2, 126.6, 71.4, 52.1, 42.1. HRMS (*ESI*)  $m/z$ :  $[\text{M}+\text{Cl}]^-$  Calcd for  $\text{C}_{11}\text{H}_{12}\text{Br}_2\text{ClO}^-$  352.8949; Found 352.8956.

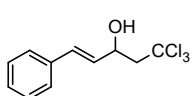

(*E*)-5,5,5-trichloro-1-phenylpent-1-en-3-ol (**4y**): Yield: 52%, yellow oil liquid;  $R_f = 0.37$  (EtOAc/petroleum ether = 1/20).  $^1\text{H}$  NMR (400 MHz,  $\text{CDCl}_3$ )  $\delta$  7.42 (d,  $J = 7.3$  Hz, 2H), 7.36 (t,  $J = 7.5$  Hz, 2H), 7.30 (d,  $J = 7.2$  Hz, 1H), 6.75 (d,  $J = 15.9$  Hz, 1H), 6.28 (dd,  $J = 15.9, 6.5$  Hz, 1H), 4.91 (q,  $J = 6.2$  Hz, 1H), 3.15 (dd,  $J = 15.1, 6.8$  Hz, 1H), 3.06 (dd,  $J = 15.2, 3.8$  Hz, 1H), 2.25 (s, 1H).  $^{13}\text{C}$  NMR (100 MHz,  $\text{CDCl}_3$ )  $\delta$  136.1, 131.5, 129.8, 128.7, 128.1, 126.6, 124.3, 70.6, 61.2. HRMS (*ESI*)  $m/z$ :  $[\text{M}+\text{Cl}]^-$  Calcd for  $\text{C}_{11}\text{H}_{11}\text{Cl}_4\text{O}^-$  298.9569; Found 298.9729.

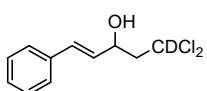

(*E*)-5,5-dichloro-1-phenylpent-1-en-5-d-3-ol (**4aa**): Yield: 68%, yellow oil liquid;  $R_f = 0.37$  (EtOAc/petroleum ether = 1/20).  $^1\text{H}$  NMR (400 MHz,  $\text{CDCl}_3$ )  $\delta$  7.43 – 7.38 (m, 2H), 7.36 (t,  $J = 7.4$  Hz, 2H), 7.32 – 7.29 (m, 1H), 6.68 (d,  $J = 15.9$  Hz, 1H), 6.23 (dd,  $J = 15.9, 6.9$  Hz, 1H), 4.60 (t,  $J = 9.7$  Hz, 1H), 2.55 (dd,  $J = 14.4, 9.1$  Hz, 1H), 2.45 (dd,  $J = 14.3, 3.9$  Hz, 1H), 1.86 (s, 1H).  $^{13}\text{C}$  NMR (100 MHz,  $\text{CDCl}_3$ )  $\delta$  136.0, 131.8, 130.0, 128.7, 128.2, 126.6, 70.0, 50.4. HRMS (*ESI*)  $m/z$ :  $[\text{M}+\text{Cl}]^-$  Calcd for  $\text{C}_{11}\text{H}_{11}\text{DCl}_3\text{O}^-$  266.0022; Found 266.0030.

## General Procedure for Products 5.

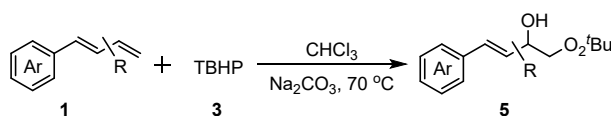

To a solution of **1** (0.5 mmol) in  $\text{CHCl}_3$  (0.5 mL) was added  $\text{Na}_2\text{CO}_3$  (1.0 mmol) and TBHP (2.0 mmol) at room temperature. Then the solution mixture was stirred at  $70^\circ\text{C}$  for 12 h, after completion of the reaction, the solvent was removed under reduced pressure and the crude product was subjected to silica gel column chromatography to afford **5**.

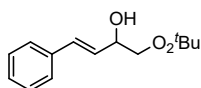

(*E*)-1-(tert-butylperoxy)-4-phenylbut-3-en-2-ol (**5a**): Yield: 67%, yellow oil liquid;  $R_f = 0.37$  (EtOAc/petroleum ether = 1/20).  $^1\text{H}$  NMR (400 MHz,  $\text{CDCl}_3$ )  $\delta$  7.41 (d,  $J = 7.4$  Hz,

2H), 7.34 (t,  $J = 7.5$  Hz, 2H), 7.30 – 7.24 (m, 1H), 6.75 (d,  $J = 15.9$  Hz, 1H), 6.19 (dd,  $J = 16.0$ , 6.1 Hz, 1H), 4.88 – 4.59 (m, 1H), 4.12 (dd,  $J = 12.5$ , 2.8 Hz, 1H), 3.93 (dd,  $J = 12.5$ , 8.2 Hz, 1H), 2.80 (s, 1H), 1.31 (s, 9H).  $^{13}\text{C}$  NMR (100 MHz,  $\text{CDCl}_3$ )  $\delta$  136.6, 131.8, 128.6, 127.8, 127.3, 126.5, 81.0, 79.1, 71.0, 26.3. HRMS (*ESI*)  $m/z$ :  $[\text{M}+\text{Na}]^+$  Calcd for  $\text{C}_{14}\text{H}_{20}\text{NaO}_3^+$  259.1305; Found 259.1312.

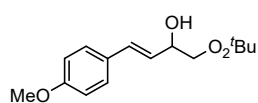

(*E*)-1-(tert-butylperoxy)-4-(4-methoxyphenyl)but-3-en-2-ol (**5b**): Yield: 74%, yellow oil liquid;  $R_f = 0.37$  (EtOAc/petroleum ether = 1/15).  $^1\text{H}$  NMR (400 MHz,  $\text{CDCl}_3$ )  $\delta$  7.34 (d,  $J = 8.7$  Hz, 2H), 6.87 (d,  $J = 8.7$  Hz, 2H), 6.68 (d,  $J = 15.9$  Hz, 1H), 6.04 (dd,  $J = 15.9$ , 6.4 Hz, 1H), 4.67 (t,  $J = 6.6$  Hz, 1H), 4.10 (dd,  $J = 12.5$ , 2.8 Hz, 1H), 3.96 – 3.88 (m, 1H), 3.83 (s, 3H), 1.30 (s, 9H).  $^{13}\text{C}$  NMR (100 MHz,  $\text{CDCl}_3$ )  $\delta$  159.4, 131.4, 129.4, 127.7, 125.0, 114.0, 80.9, 79.2, 71.2, 55.3, 26.3. HRMS (*ESI*)  $m/z$ :  $[\text{M}+\text{Na}]^+$  Calcd for  $\text{C}_{15}\text{H}_{22}\text{NaO}_4^+$  289.1410; Found 289.1418.

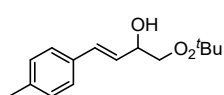

(*E*)-1-(tert-butylperoxy)-4-(p-tolyl)but-3-en-2-ol (**5c**): Yield: 72%, yellow oil liquid;  $R_f = 0.37$  (EtOAc/petroleum ether = 1/20).  $^1\text{H}$  NMR (400 MHz,  $\text{CDCl}_3$ )  $\delta$  7.30 (d,  $J = 8.1$  Hz, 2H), 7.14 (d,  $J = 7.9$  Hz, 2H), 6.71 (d,  $J = 15.9$  Hz, 1H), 6.13 (dd,  $J = 16.0$ , 6.3 Hz, 1H), 4.73 – 4.65 (m, 1H), 4.10 (dd,  $J = 12.5$ , 2.8 Hz, 1H), 3.92 (dd,  $J = 12.5$ , 8.3 Hz, 1H), 2.42 (dd,  $J = 21.0$ , 7.7 Hz, 1H), 2.36 (s, 3H), 1.31 (s, 9H).  $^{13}\text{C}$  NMR (100 MHz,  $\text{CDCl}_3$ )  $\delta$  137.6, 133.8, 131.8, 129.3, 126.4, 126.2, 79.2, 71.1, 26.3, 21.2. HRMS (*ESI*)  $m/z$ :  $[\text{M}+\text{Na}]^+$  Calcd for  $\text{C}_{15}\text{H}_{22}\text{NaO}_3^+$  273.1461; Found 273.1468.

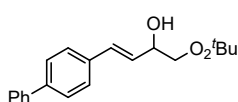

(*E*)-4-([1,1'-biphenyl]-4-yl)-1-(tert-butylperoxy)but-3-en-2-ol (**5d**): Yield: 66%, yellow oil liquid;  $R_f = 0.37$  (EtOAc/petroleum ether = 1/25).  $^1\text{H}$  NMR (400 MHz,  $\text{CDCl}_3$ )  $\delta$  7.64 – 7.61 (m, 2H), 7.59 (d,  $J = 8.3$  Hz, 2H), 7.51 – 7.47 (m, 2H), 7.45 (d,  $J = 7.8$  Hz, 2H), 7.39 – 7.32 (m, 1H), 6.79 (d,  $J = 16.0$  Hz, 1H), 6.24 (dd,  $J = 16.0$ , 6.1 Hz, 1H), 4.88 – 4.66 (m, 1H), 4.14 (dd,  $J = 12.5$ , 2.8 Hz, 1H), 3.95 (dd,  $J = 12.5$ , 8.2 Hz, 1H), 2.81 (s, 1H), 1.32 (s, 9H).  $^{13}\text{C}$  NMR (100 MHz,  $\text{CDCl}_3$ )  $\delta$  148.7, 140.7, 140.5, 135.6, 131.3, 128.8, 127.4, 127.3, 127.3, 126.9, 81.0, 79.1, 71.1, 26.4. HRMS (*ESI*)  $m/z$ :  $[\text{M}+\text{Na}]^+$  Calcd for  $\text{C}_{20}\text{H}_{24}\text{NaO}_3^+$  335.1618; Found 335.1626.

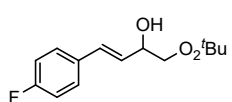

(*E*)-1-(tert-butylperoxy)-4-(4-fluorophenyl)but-3-en-2-ol (**5e**): Yield: 57%, yellow oil liquid;  $R_f = 0.37$  (EtOAc/petroleum ether = 1/20).  $^1\text{H}$  NMR (400 MHz,  $\text{CDCl}_3$ )  $\delta$  7.37 (dd,  $J = 8.7$ , 5.4 Hz, 2H), 7.02 (t,  $J = 8.7$  Hz, 2H), 6.71 (d,  $J = 15.8$  Hz, 1H), 6.10 (dd,  $J = 16.0$ , 6.1 Hz, 1H), 4.69 (t,  $J = 6.5$  Hz, 1H), 4.11 (dd,  $J = 12.5$ , 2.8 Hz, 1H), 3.93 (d,  $J = 8.2$  Hz, 1H), 2.80 (s, 1H), 1.31 (s, 9H).  $^{13}\text{C}$  NMR (100 MHz,  $\text{CDCl}_3$ )  $\delta$  162.40 (d,  $J = 247.2$  Hz), 132.77 (d,  $J = 3.4$  Hz), 130.60, 128.02 (d,  $J = 8.0$  Hz), 127.04 (d,  $J = 2.2$  Hz), 115.48 (d,  $J = 21.6$  Hz), 81.00, 79.06, 70.97, 26.33. HRMS (*ESI*)  $m/z$ :  $[\text{M}+\text{Na}]^+$  Calcd for  $\text{C}_{14}\text{H}_{19}\text{FNaO}_3^+$  277.1210; Found 277.1217.

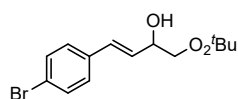

(*E*)-4-(4-bromophenyl)-1-(tert-butylperoxy)but-3-en-2-ol (**5f**): Yield: 60%, yellow oil liquid;  $R_f = 0.37$  (EtOAc/petroleum ether = 1/20).  $^1\text{H}$  NMR (400 MHz,  $\text{CDCl}_3$ )  $\delta$  7.46 (d,  $J = 8.4$  Hz, 2H), 7.36 – 7.18 (m, 2H), 6.69 (d,  $J = 16.0$  Hz, 1H), 6.18 (dd,  $J = 16.0$ , 6.0 Hz, 1H), 4.69 (t,  $J = 6.5$  Hz, 1H), 4.11 (dd,  $J = 12.6$ , 2.8 Hz, 1H), 3.91 (dd,  $J = 12.6$ , 8.2 Hz, 1H), 2.82 (s, 1H), 1.30 (s, 9H).  $^{13}\text{C}$  NMR (100 MHz,  $\text{CDCl}_3$ )  $\delta$  135.6, 131.7, 130.5, 128.1, 128.0, 121.5, 81.0, 79.0, 70.9, 26.3. HRMS (*ESI*)  $m/z$ :  $[\text{M}+\text{Na}]^+$  Calcd for  $\text{C}_{14}\text{H}_{19}\text{BrNaO}_3^+$  337.0410; Found 337.0405.

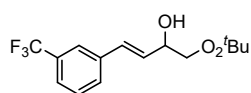

(*E*)-1-(tert-butylperoxy)-4-(3-(trifluoromethyl)phenyl)but-3-en-2-ol (**5g**): Yield: 44%, yellow oil liquid;  $R_f = 0.37$  (EtOAc/petroleum ether = 1/20).  $^1\text{H}$  NMR (400 MHz,  $\text{CDCl}_3$ )  $\delta$  7.65 (s, 1H), 7.56 (d,  $J = 7.5$  Hz, 1H), 7.51 (d,  $J = 7.7$  Hz, 1H), 7.44 (t,  $J = 7.7$  Hz, 1H), 6.79 (dd,  $J = 16.0$ , 1.2 Hz, 1H), 6.28 (dd,  $J = 16.0$ , 5.8 Hz, 1H), 4.73 (s, 1H), 4.13 (dd,  $J = 12.6$ , 2.9 Hz, 1H), 3.93 (dd,  $J = 12.6$ , 8.1 Hz, 1H), 2.92 (s, 1H), 1.31 (s, 9H).  $^{13}\text{C}$  NMR (100 MHz,  $\text{CDCl}_3$ )  $\delta$  137.43, 131.14, 130.82, 130.14, 129.69, 129.46, 129.02, 124.22 (dd,  $J = 7.5$ , 3.7 Hz), 123.09 (q,  $J = 3.9$  Hz), 81.08, 78.94, 70.78, 26.31. HRMS (*ESI*)  $m/z$ :  $[\text{M}+\text{H}]^+$  Calcd for  $\text{C}_{15}\text{H}_{20}\text{F}_3\text{O}_3^+$  305.1359; Found 305.1512.



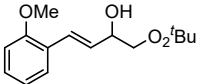
 (*E*)-1-(tert-butylperoxy)-4-(2-methoxyphenyl)but-3-en-2-ol (**5h**): Yield: 52%, yellow oil liquid;  $R_f = 0.37$  (EtOAc/petroleum ether = 1/15).  $^1\text{H NMR}$  (400 MHz,  $\text{CDCl}_3$ )  $\delta$  7.45 (dd,  $J = 7.6, 1.5$  Hz, 1H), 7.27 – 7.21 (m, 1H), 7.04 (dd,  $J = 16.6, 6.8$  Hz, 1H), 6.94 (t,  $J = 7.1$  Hz, 1H), 6.89 (d,  $J = 8.2$  Hz, 1H), 6.21 (dd,  $J = 16.1, 6.4$  Hz, 1H), 4.71 (dd,  $J = 6.9, 6.0$  Hz, 1H), 4.12 (dd,  $J = 12.4, 2.9$  Hz, 1H), 3.95 (dd,  $J = 7.8, 4.6$  Hz, 1H), 3.92 – 3.89 (m, 1H), 3.86 (s, 3H), 2.77 (s, 1H), 1.31 (s, 9H).  $^{13}\text{C NMR}$  (100 MHz,  $\text{CDCl}_3$ )  $\delta$  156.8, 128.8, 128.0, 127.0, 126.8, 125.6, 120.6, 110.9, 80.9, 79.2, 71.4, 55.4, 26.4. HRMS (*ESI*)  $m/z$ :  $[\text{M}+\text{Na}]^+$  Calcd for  $\text{C}_{15}\text{H}_{22}\text{NaO}_4^+$  289.1410; Found 289.1407.

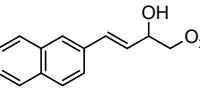
 (*E*)-1-(tert-butylperoxy)-4-(naphthalen-2-yl)but-3-en-2-ol (**5i**): Yield: 49%, yellow oil liquid;  $R_f = 0.37$  (EtOAc/petroleum ether = 1/25).  $^1\text{H NMR}$  (400 MHz,  $\text{CDCl}_3$ )  $\delta$  7.85 – 7.75 (m, 4H), 7.62 (dd,  $J = 8.6, 1.8$  Hz, 1H), 7.53 – 7.43 (m, 2H), 6.91 (dd,  $J = 16.0, 1.4$  Hz, 1H), 6.32 (dd,  $J = 15.9, 6.1$  Hz, 1H), 4.77 (m, 1H), 4.16 (dd,  $J = 12.5, 2.9$  Hz, 1H), 3.97 (dd,  $J = 12.6, 8.2$  Hz, 1H), 2.85 (s, 1H), 1.32 (s, 9H).  $^{13}\text{C NMR}$  (100 MHz,  $\text{CDCl}_3$ )  $\delta$  134.1, 133.6, 133.1, 131.9, 128.2, 128.0, 127.69, 127.66, 126.6, 126.3, 125.9, 123.6, 81.0, 79.1, 71.1, 26.4. HRMS (*ESI*)  $m/z$ :  $[\text{M}+\text{Na}]^+$  Calcd for  $\text{C}_{18}\text{H}_{22}\text{NaO}_3^+$  309.1461; Found 309.1457.

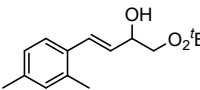
 (*E*)-1-(tert-butylperoxy)-4-(2,4-dimethylphenyl)but-3-en-2-ol (**5j**): Yield: 41%, yellow oil liquid;  $R_f = 0.37$  (EtOAc/petroleum ether = 1/25).  $^1\text{H NMR}$  (400 MHz,  $\text{CDCl}_3$ )  $\delta$  7.36 (d,  $J = 7.8$  Hz, 1H), 7.00 (d,  $J = 7.2$  Hz, 2H), 6.92 (d,  $J = 15.8$  Hz, 1H), 6.03 (dd,  $J = 15.8, 6.2$  Hz, 1H), 4.70 (t,  $J = 6.3$  Hz, 1H), 4.15 – 4.05 (m, 1H), 3.98 – 3.90 (m, 1H), 2.80 (s, 1H), 2.35 (s, 3H), 2.32 (s, 3H), 1.31 (s, 9H).  $^{13}\text{C NMR}$  (100 MHz,  $\text{CDCl}_3$ )  $\delta$  137.4, 135.4, 132.9, 131.1, 129.6, 127.7, 126.8, 125.6, 80.9, 79.2, 71.3, 26.4, 21.1, 19.74. HRMS (*ESI*)  $m/z$ :  $[\text{M}+\text{Na}]^+$  Calcd for  $\text{C}_{16}\text{H}_{24}\text{NaO}_3^+$  287.1618; Found 287.1610.

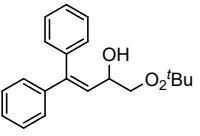
 1-(tert-butylperoxy)-4,4-diphenylbut-3-en-2-ol (**5k**): Yield: 35%, yellow oil liquid;  $R_f = 0.37$  (EtOAc/petroleum ether = 1/25).  $^1\text{H NMR}$  (400 MHz,  $\text{CDCl}_3$ )  $\delta$  7.41 (dt,  $J = 6.7, 1.9$  Hz, 2H), 7.39 – 7.34 (m, 2H), 7.29 (s, 4H), 7.27 – 7.24 (m, 2H), 6.07 (dd,  $J = 9.1, 1.7$  Hz, 1H), 4.63 – 4.52 (m, 1H), 4.09 (dt,  $J = 12.4, 2.1$  Hz, 1H), 4.02 – 3.93 (m, 1H), 1.25 (s, 9H).  $^{13}\text{C NMR}$  (100 MHz,  $\text{CDCl}_3$ )  $\delta$  145.4, 141.6, 139.1, 129.7, 128.3, 128.21, 128.17, 127.7, 127.6, 126.4, 80.9, 79.0, 68.4, 26.3. HRMS (*ESI*)  $m/z$ :  $[\text{M}+\text{Na}]^+$  Calcd for  $\text{C}_{20}\text{H}_{24}\text{NaO}_3^+$  335.1618; Found 335.1611.

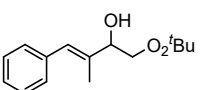
 1-(tert-butylperoxy)-3-methyl-4-phenylbut-3-en-2-ol (**5l**: 3.3/1.0): Yield: 38%, yellow oil liquid;  $R_f = 0.37$  (EtOAc/petroleum ether = 1/20). major:  $^1\text{H NMR}$  (400 MHz,  $\text{CDCl}_3$ )  $\delta$  7.38 – 7.33 (m, 2H), 7.32 – 7.29 (m, 2H), 7.27 – 7.24 (m, 1H), 6.67 (s, 1H), 4.56 (dd,  $J = 8.4, 2.1$  Hz, 1H), 4.15 (dd,  $J = 12.4, 2.6$  Hz, 1H), 3.98 (dd,  $J = 12.4, 8.5$  Hz, 1H), 2.82 (s, 1H), 1.91 (s, 3H), 1.31 (s, 9H).  $^{13}\text{C NMR}$  (100 MHz,  $\text{CDCl}_3$ )  $\delta$  137.5, 136.1, 129.0, 128.1, 126.7, 126.5, 80.9, 78.5, 75.4, 26.4, 26.3, 14.5. Minor:  $^1\text{H NMR}$  (400 MHz,  $\text{CDCl}_3$ )  $\delta$  7.38 – 7.33 (m, 2H), 7.32 – 7.29 (m, 1H), 7.23 (d,  $J = 7.1$  Hz, 2H), 6.50 (s, 1H), 5.14 – 5.08 (m, 1H), 4.10 (d,  $J = 5.6$  Hz, 2H), 1.94 (d,  $J = 1.2$  Hz, 3H), 1.27 (s, 9H).  $^{13}\text{C NMR}$  (100 MHz,  $\text{CDCl}_3$ )  $\delta$  143.2, 136.5, 129.2, 128.8, 128.1, 126.6, 78.2, 68.1, 65.2, 31.5, 18.5. HRMS (*ESI*)  $m/z$ :  $[\text{M}+\text{Na}]^+$  Calcd for  $\text{C}_{15}\text{H}_{22}\text{NaO}_3^+$  273.1461; Found 273.1462.

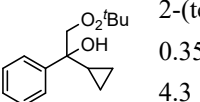
 2-(tert-butylperoxy)-1-cyclopropyl-1-phenylethan-1-ol (**5o**): Yield: 37%, yellow oil liquid;  $R_f = 0.35$  (EtOAc/petroleum ether = 1/20).  $^1\text{H NMR}$  (400 MHz,  $\text{CDCl}_3$ )  $\delta$  8.93 (s, 1H), 7.37 (d,  $J = 4.3$  Hz, 4H), 7.31 (dd,  $J = 8.8, 4.7$  Hz, 1H), 4.80 – 4.57 (m, 2H), 1.51 – 1.38 (m, 1H), 1.34 (s, 9H), 0.54 – 0.38 (m, 2H), 0.32 – 0.25 (m, 1H), 0.08 (dq,  $J = 9.9, 4.9$  Hz, 1H).  $^{13}\text{C NMR}$  (100 MHz,  $\text{CDCl}_3$ )  $\delta$  137.71, 127.92, 127.62, 126.72, 87.98, 81.79, 77.15, 26.36, 15.77, 1.08, 0.95. HRMS (*ESI*)  $m/z$ :  $[\text{M}+\text{Na}]^+$  Calcd for  $\text{C}_{15}\text{H}_{22}\text{NaO}_3^+$  273.1461; Found 273.1467.

## Procedure for the Synthesis of Products 6a and 7a.

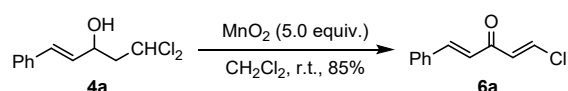

To a solution of **4a** (0.2 mmol) in  $\text{CH}_2\text{Cl}_2$  (2.0 mL) was added  $\text{MnO}_2$  (1.0 mmol) at room temperature. Then the solution mixture was stirred at the same temperature, after completion of the reaction, the solvent was removed under reduced pressure and the crude product was subjected to silica gel column chromatography to afford **6a**.

1-chloro-5-phenylpenta-1,4-dien-3-one (**6a**)<sup>[3]</sup>: Yield: 85%;  $R_f = 0.4$  (EtOAc/petroleum ether = 1/25)  $^1\text{H}$  NMR (400 MHz,  $\text{CDCl}_3$ )  $\delta$  7.66 (d,  $J = 16.0$  Hz, 1H), 7.60 – 7.55 (m, 2H), 7.42 (dd,  $J = 7.3, 5.4$  Hz, 4H), 6.89 (d,  $J = 13.4$  Hz, 1H), 6.85 (d,  $J = 16.0$  Hz, 1H).  $^{13}\text{C}$  NMR (100 MHz,  $\text{CDCl}_3$ )  $\delta$  186.4, 144.6, 137.0, 134.3, 131.1, 130.9, 129.1, 128.5, 124.9.

## References:

- [1] X.-J. Wei, D.-T. Yang, L. Wang, T. Song, L.-Z. Wu, and Q. Liu, *Org. Lett.* 2013, **15**, 6054–6057.
- [2] R. A. Fernandes, P. Kumar, A. Bhowmik, and D. A. Gorge, *Org. Lett.* 2022, **24**, 3435–3439.
- [3] A. S. K. Hashmi, and L. Grundl, *Tetrahedron* 2005, **61**, 6231–6236.

# Copies of $^1\text{H}$ , $^{13}\text{C}$ NMR spectra

4a

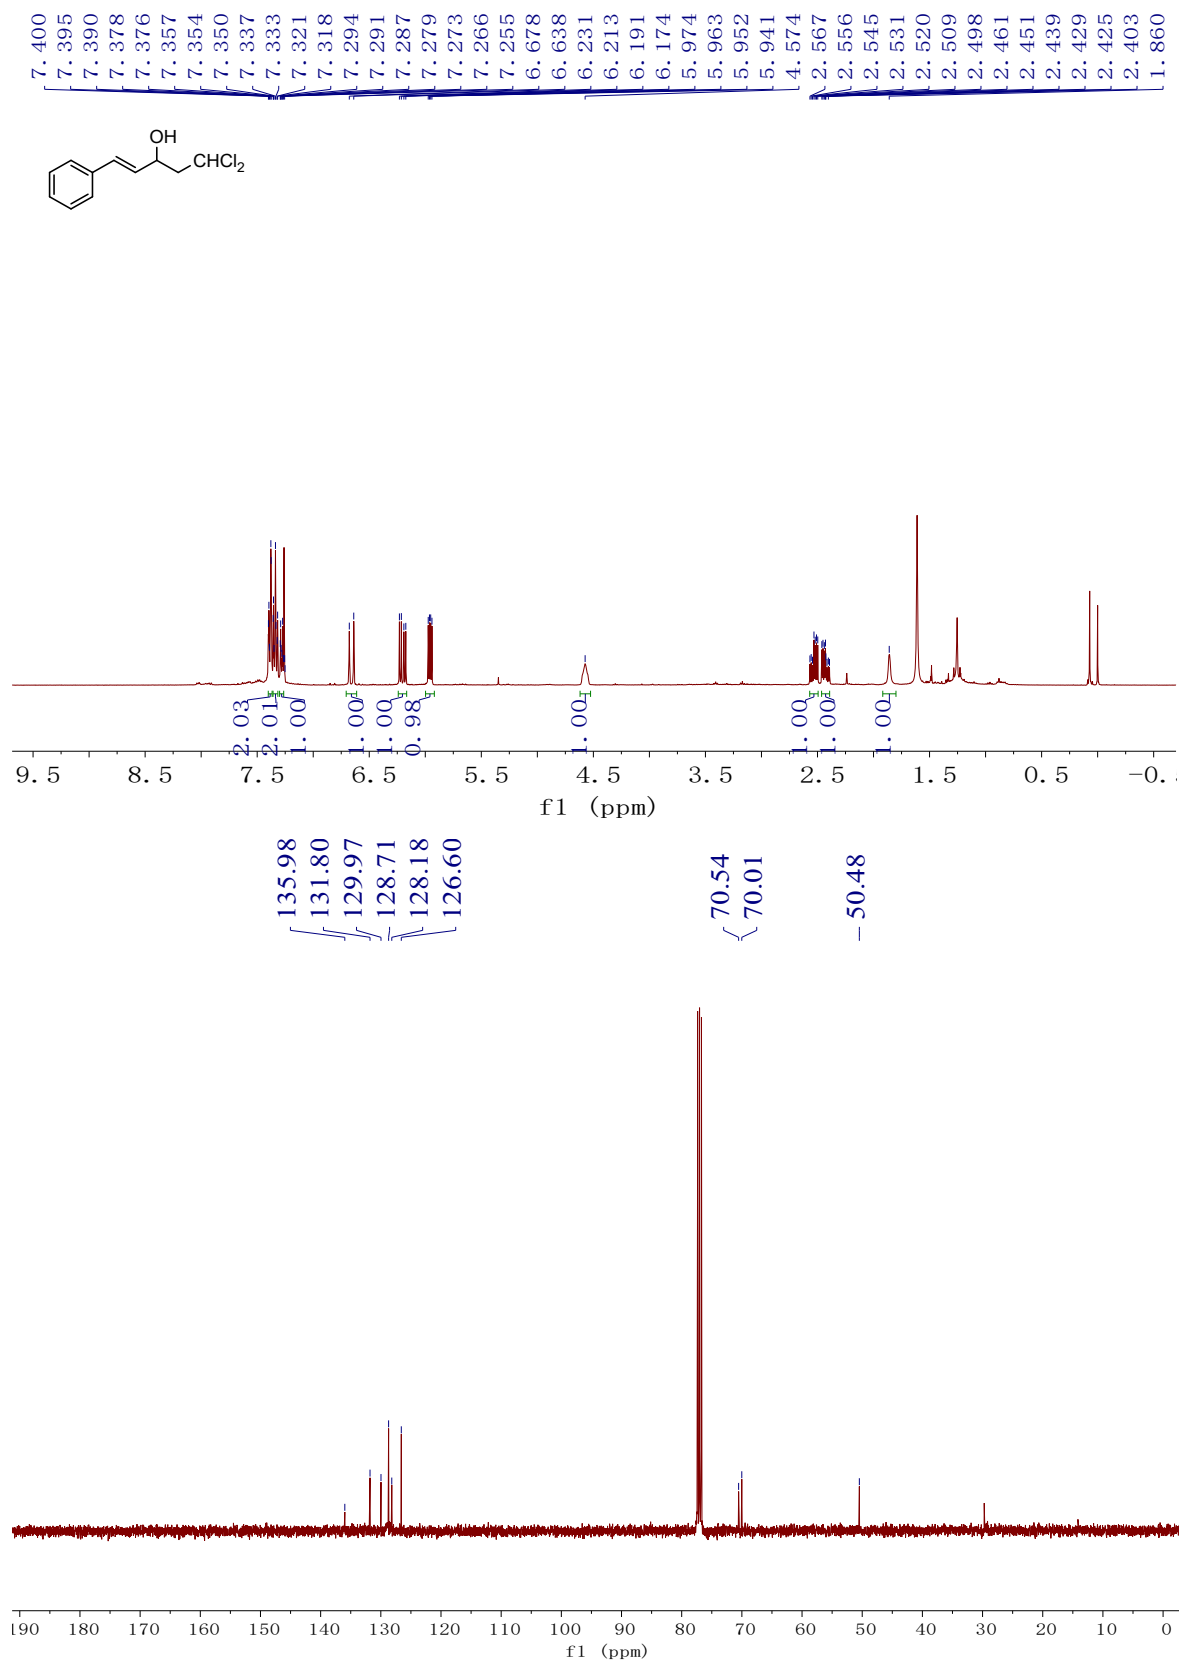

4b

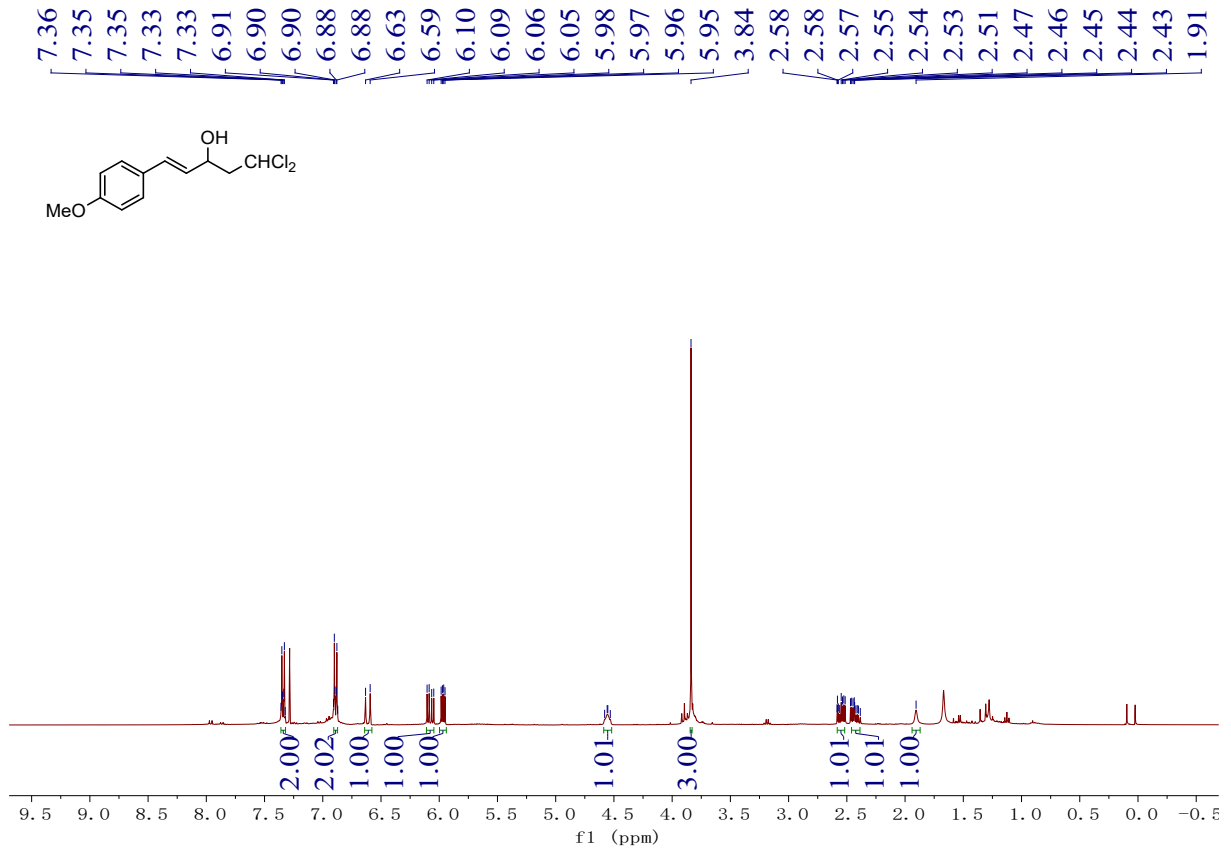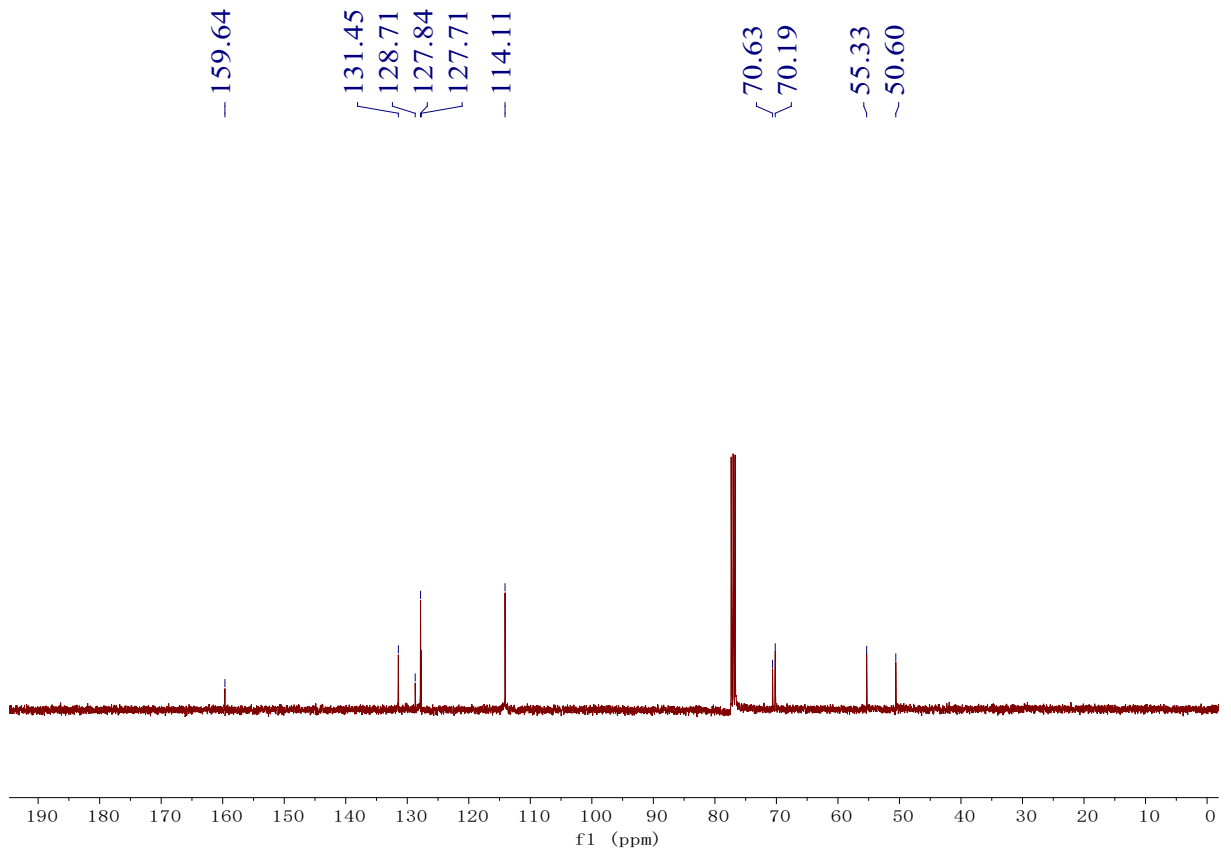

4c

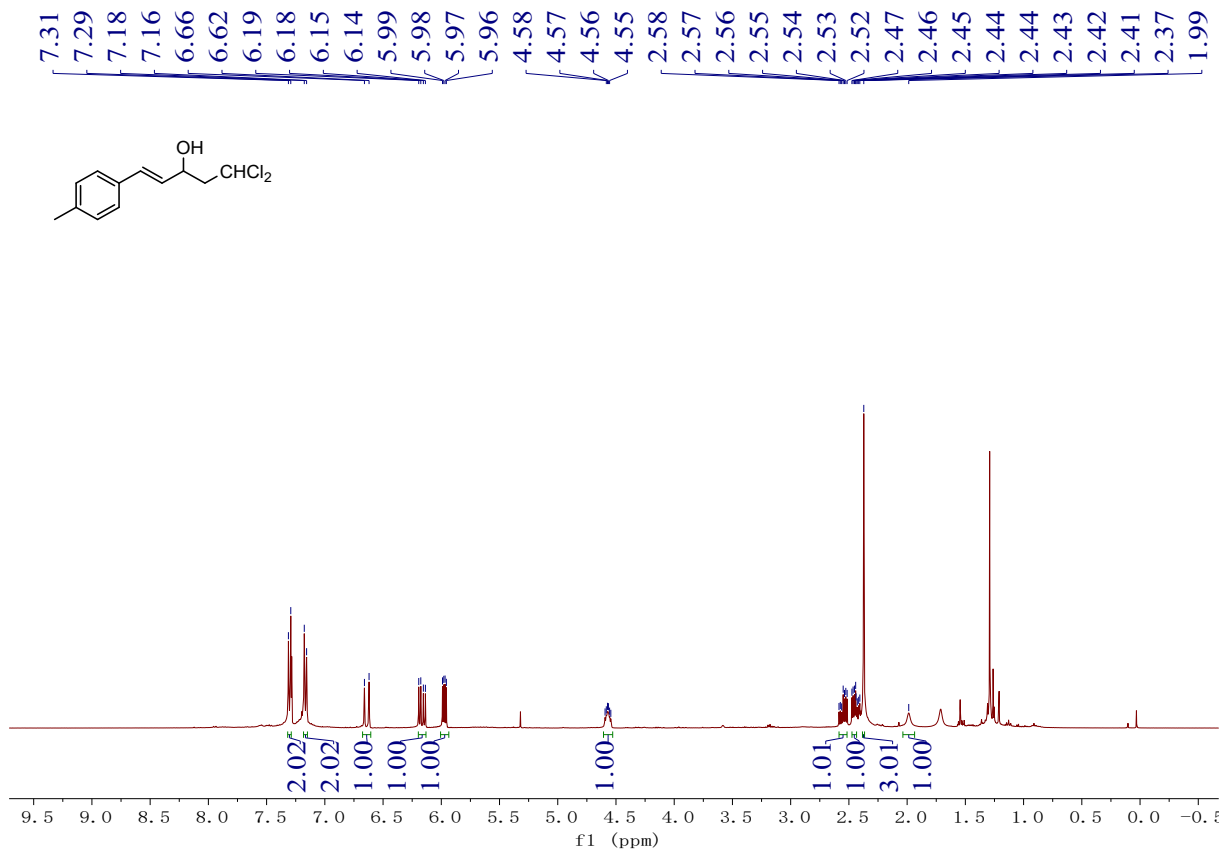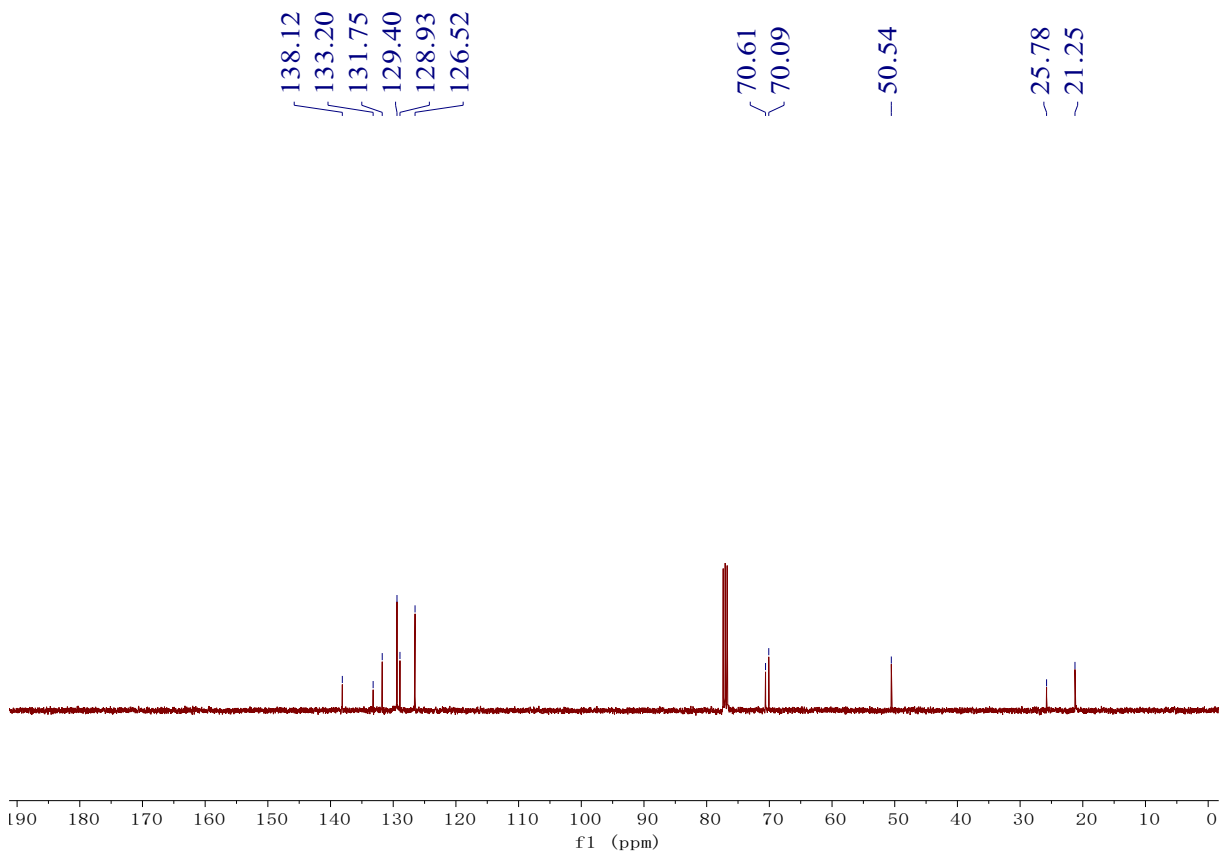

4d

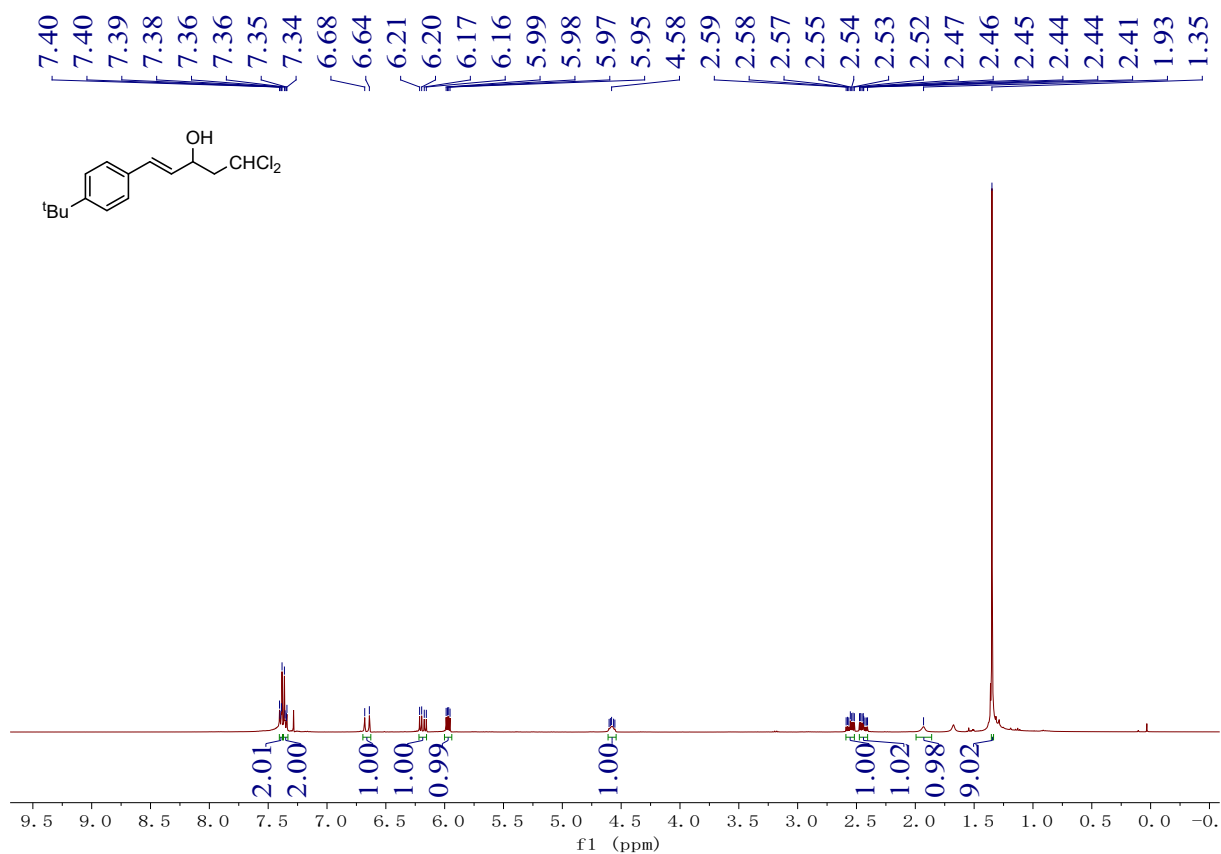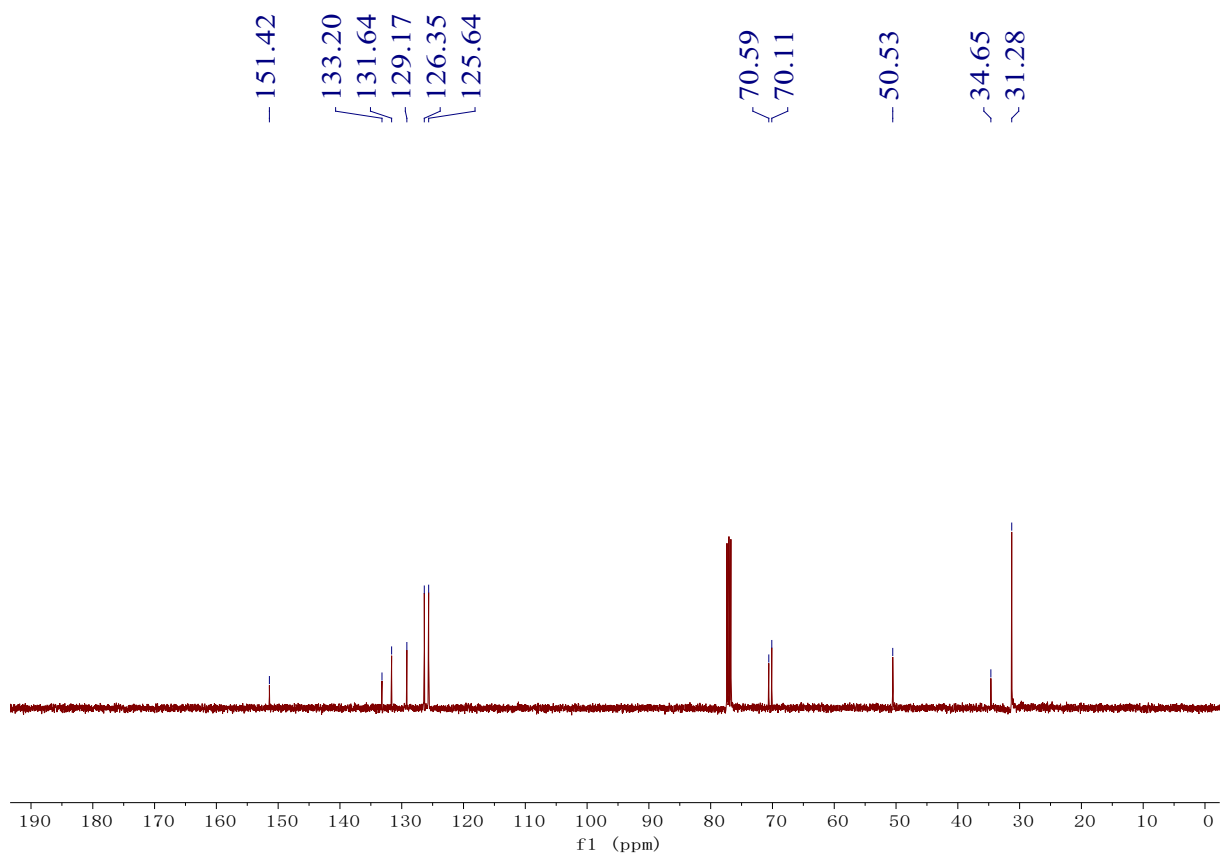

4e

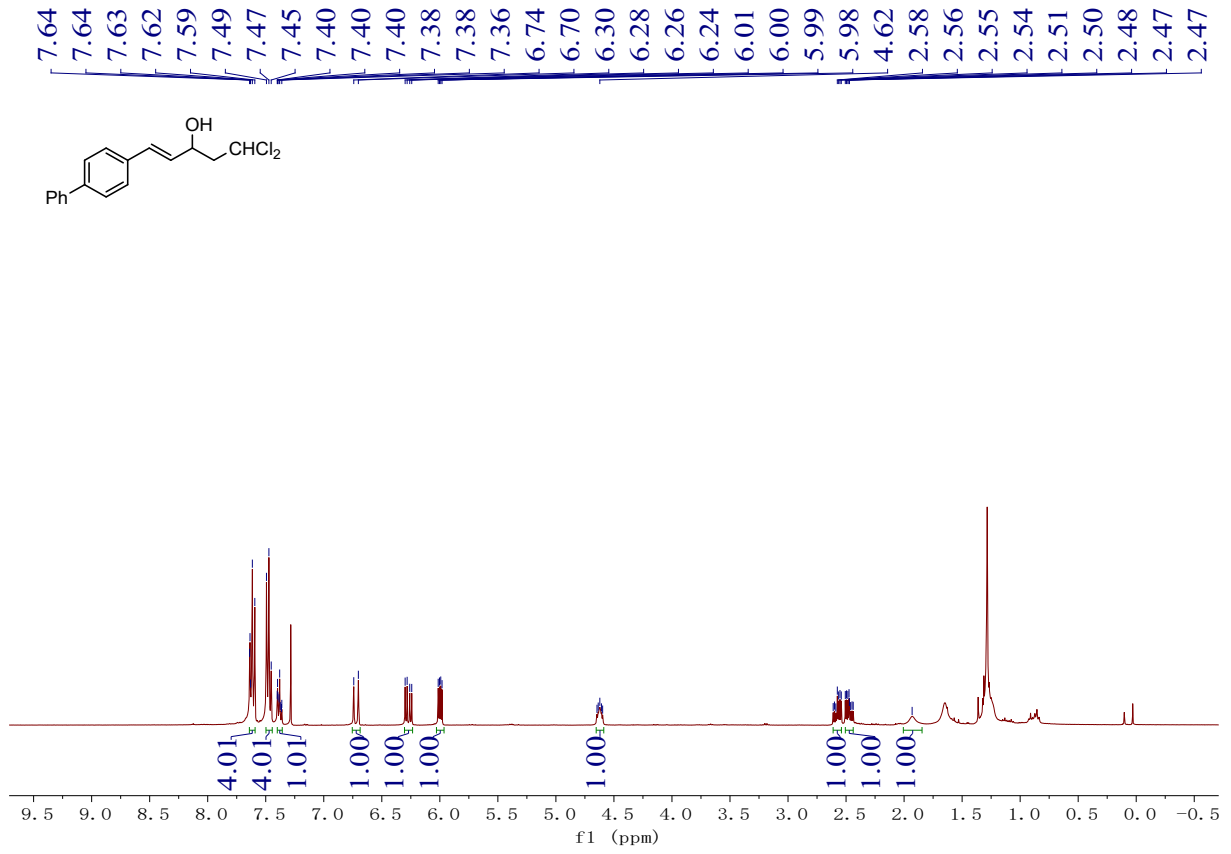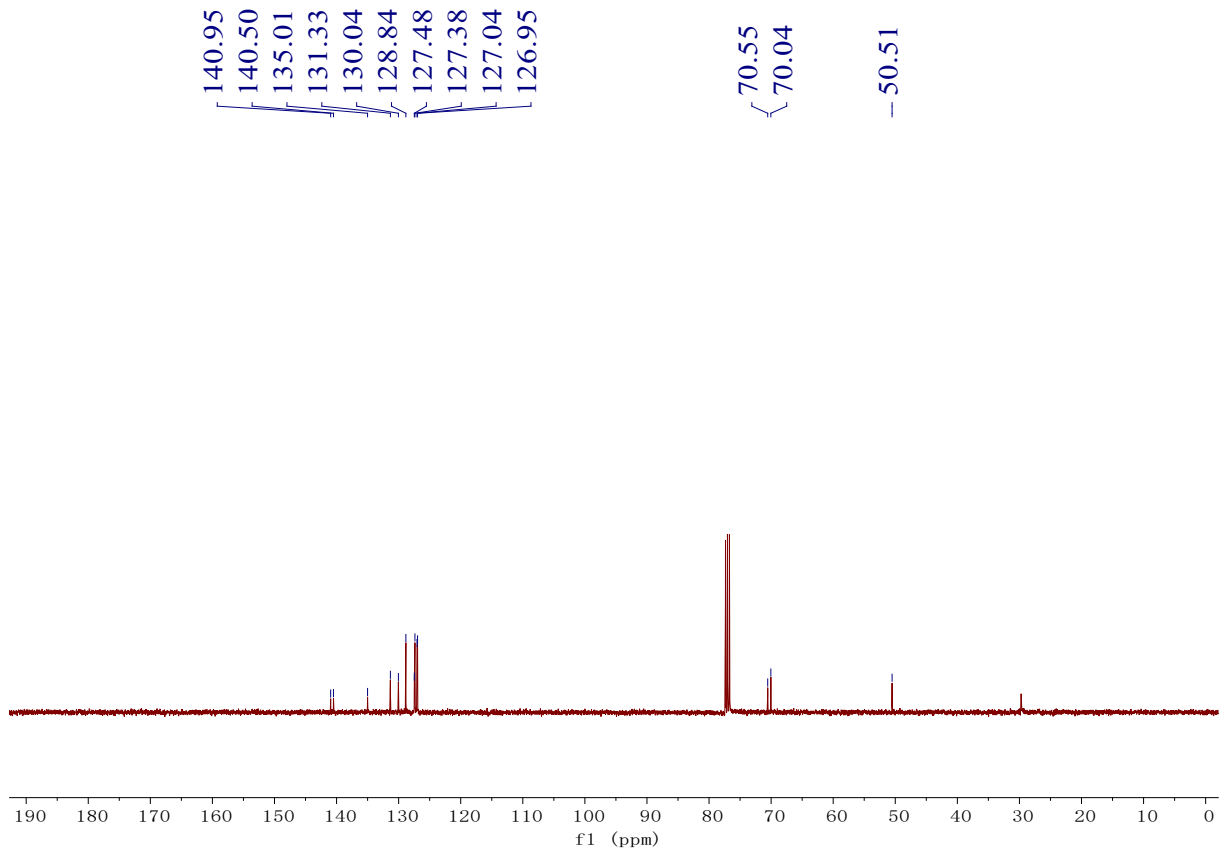

4f

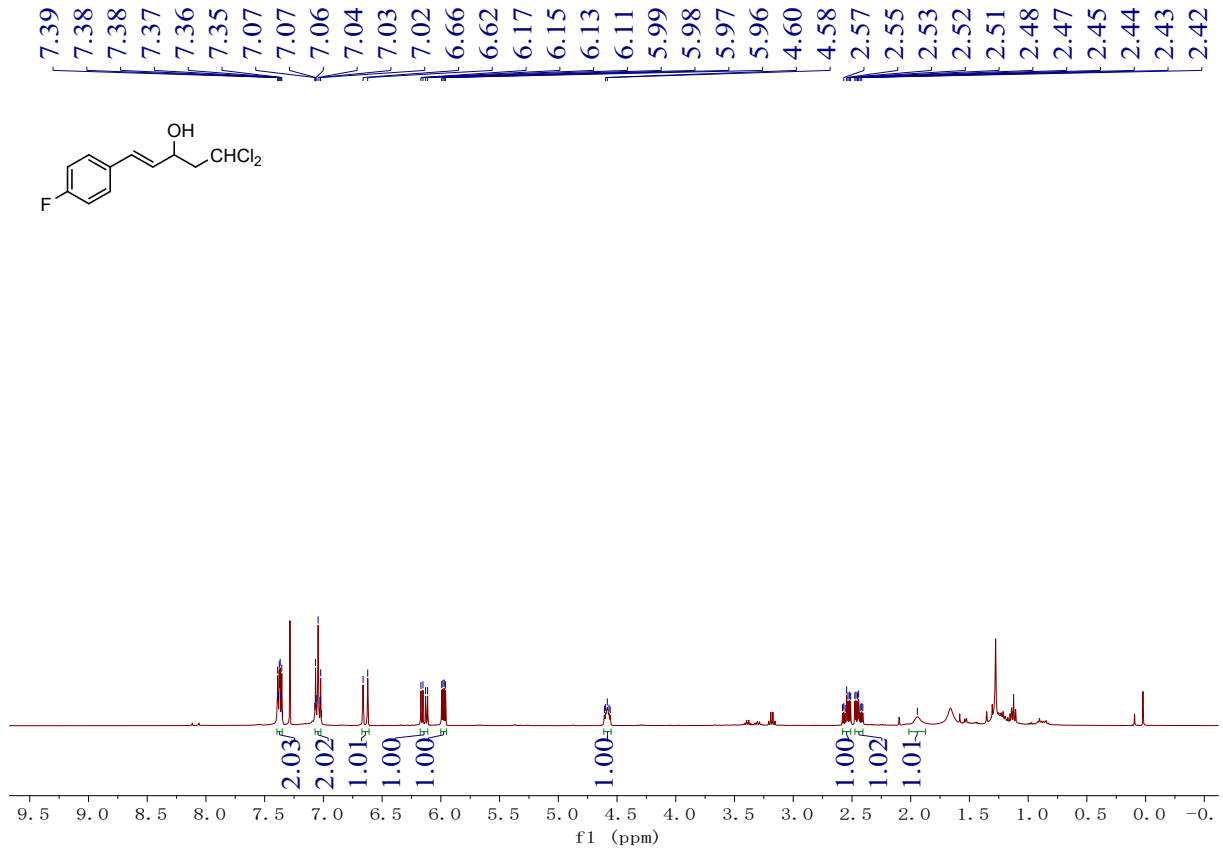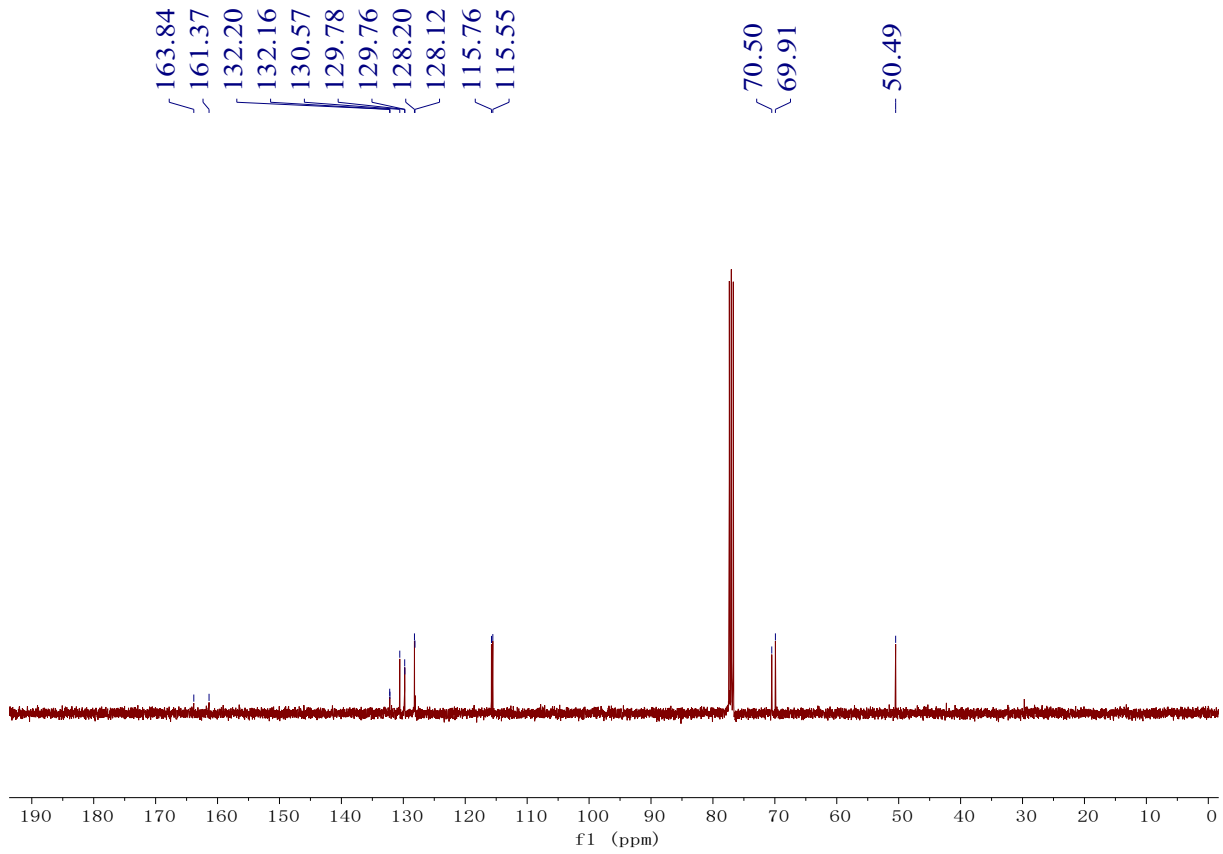



4g

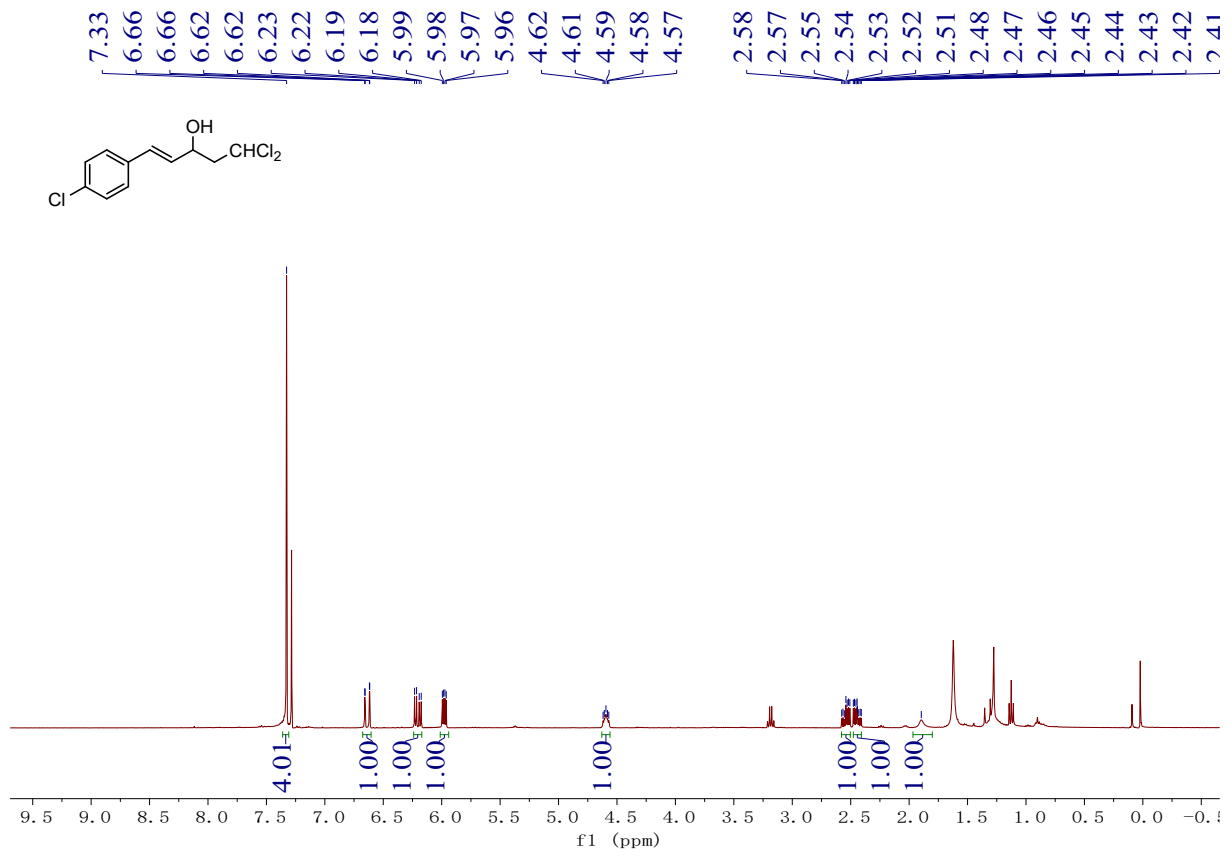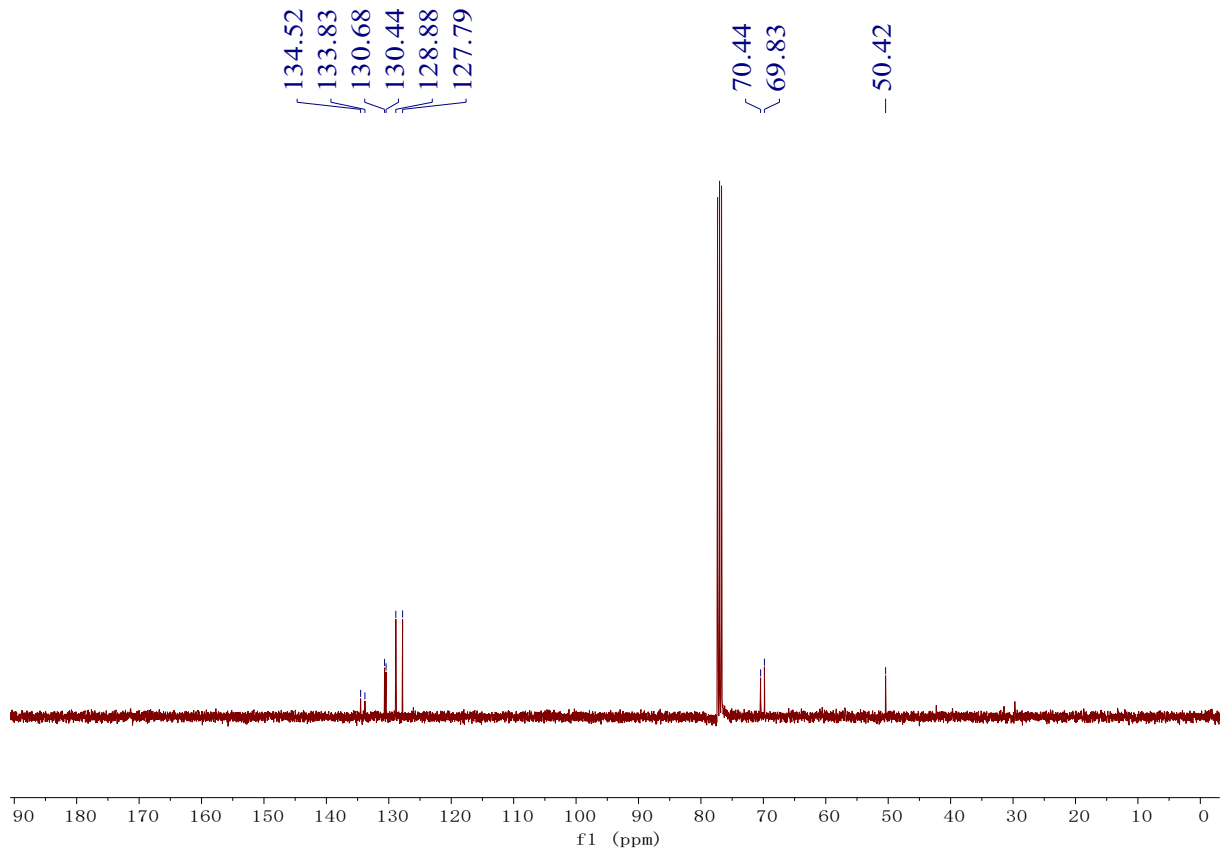

4h

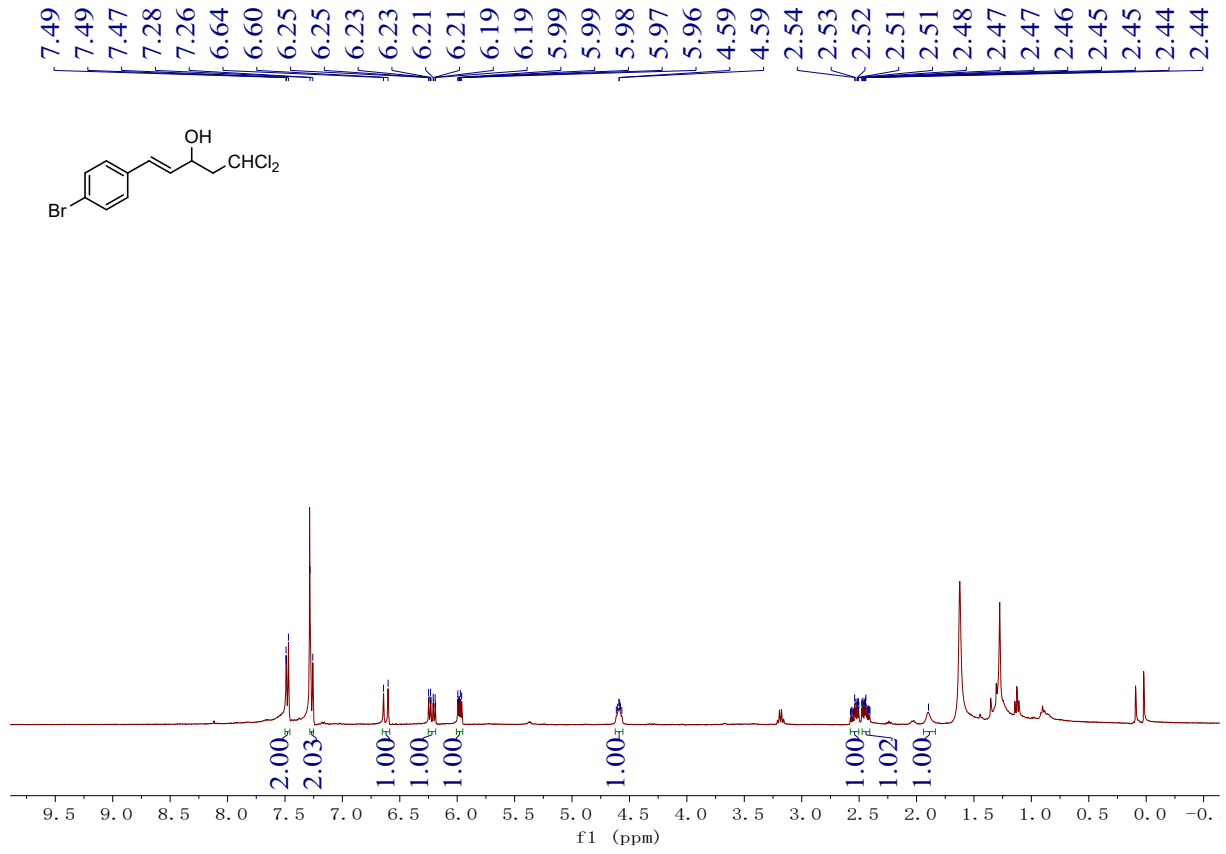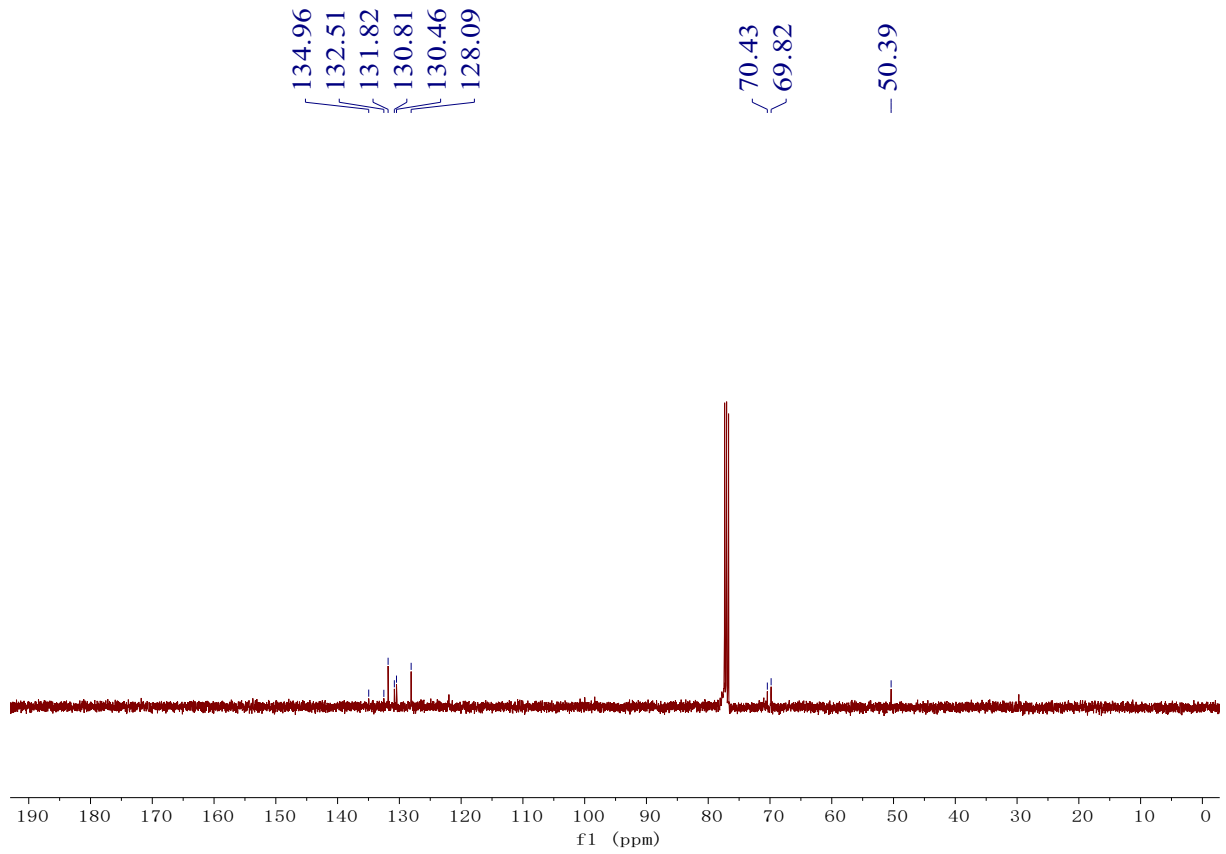

4i

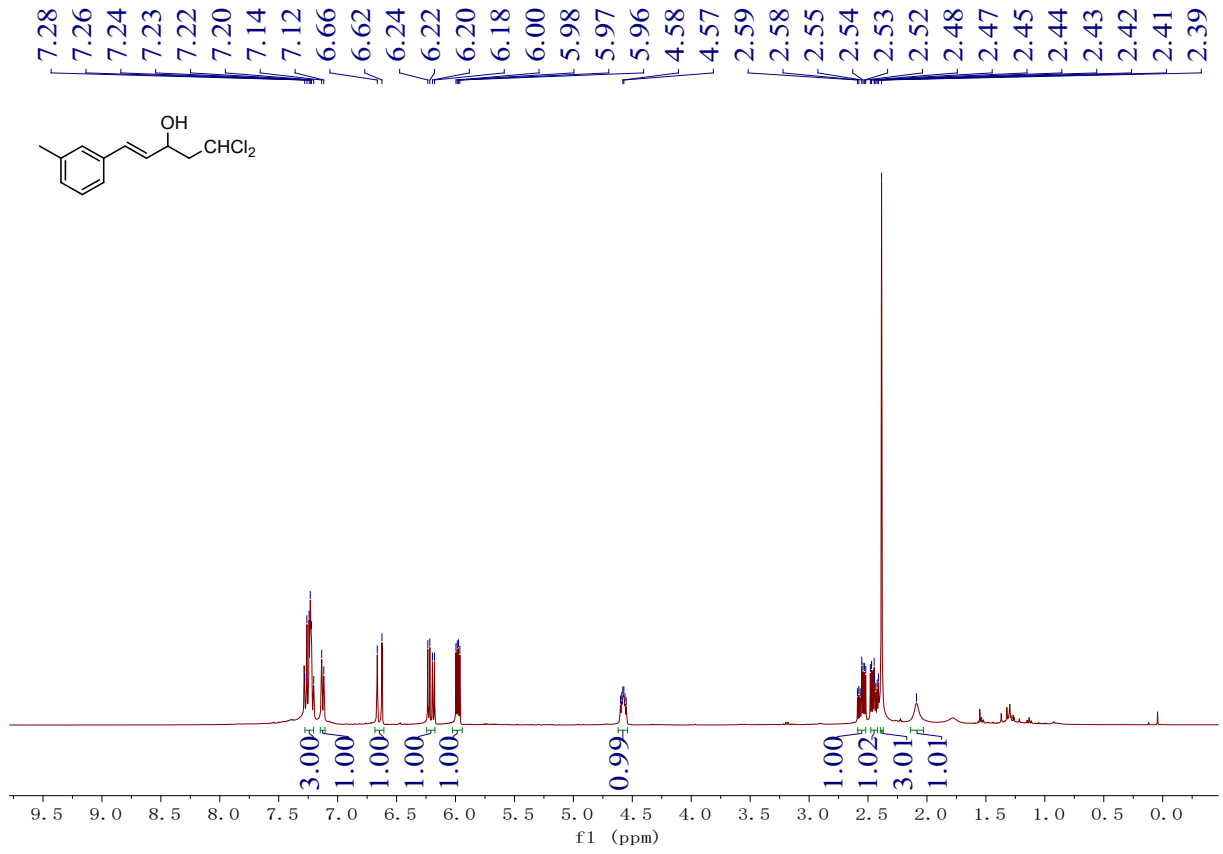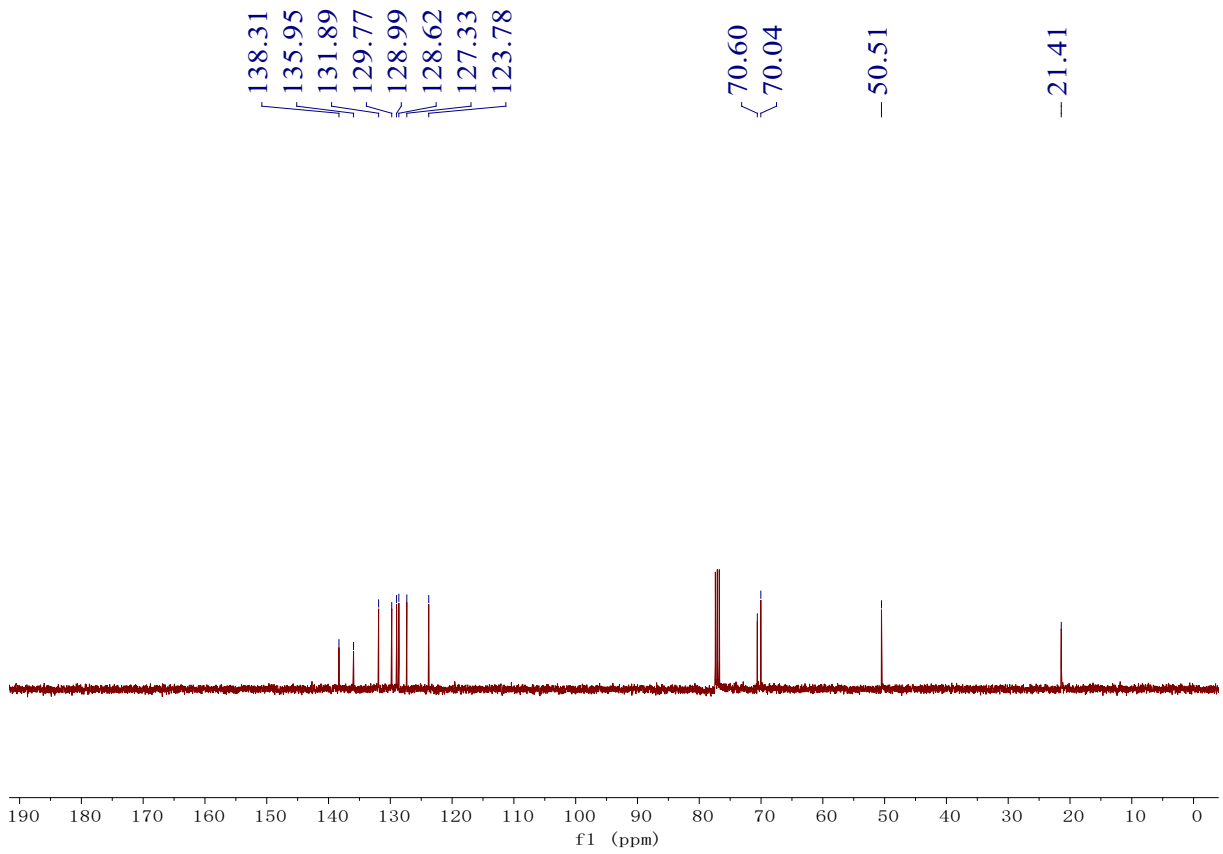

4j

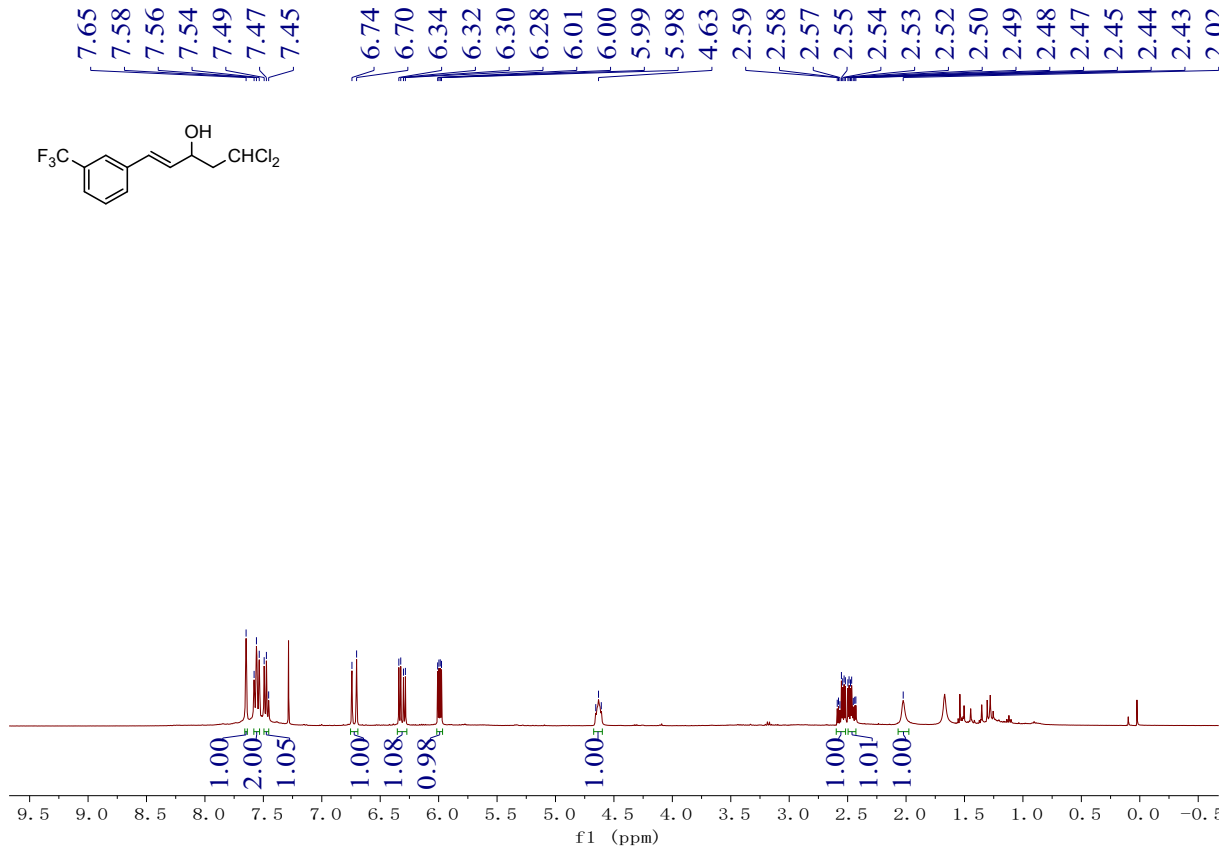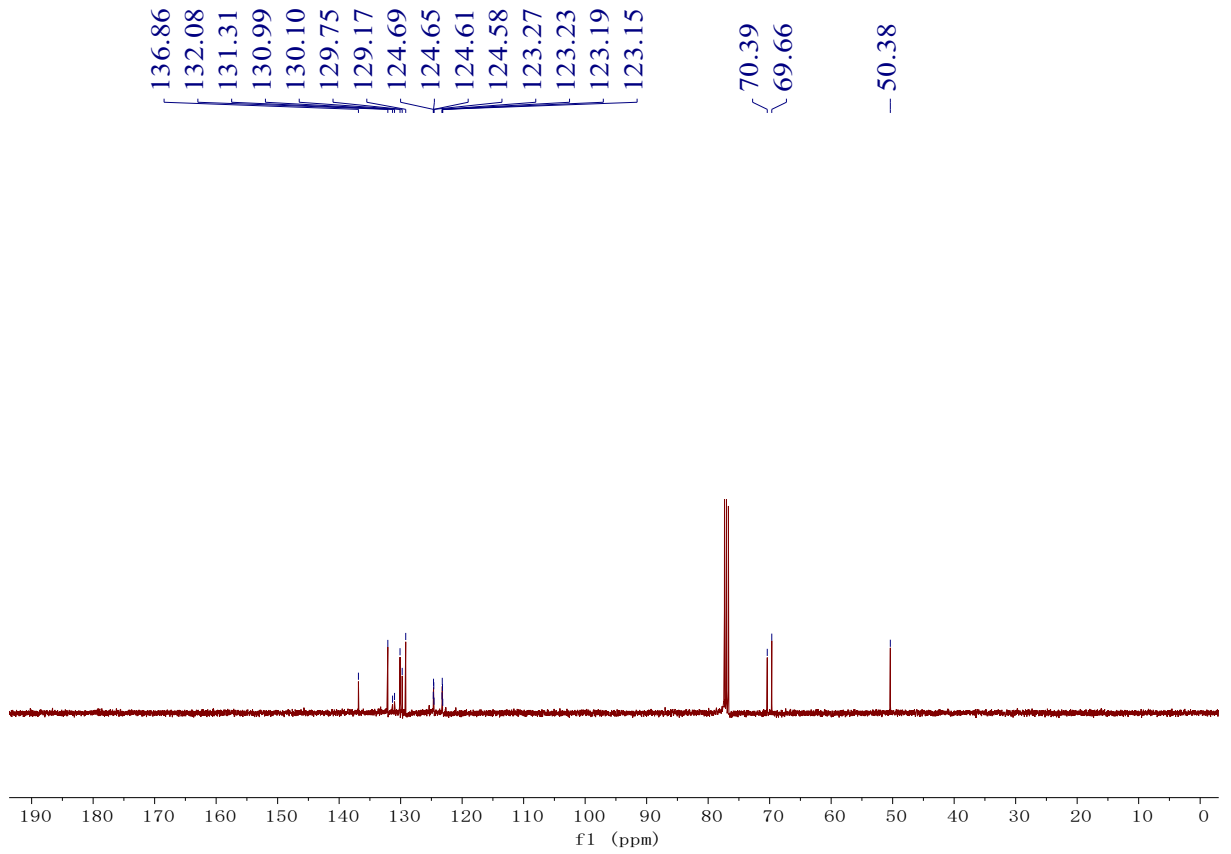

4k

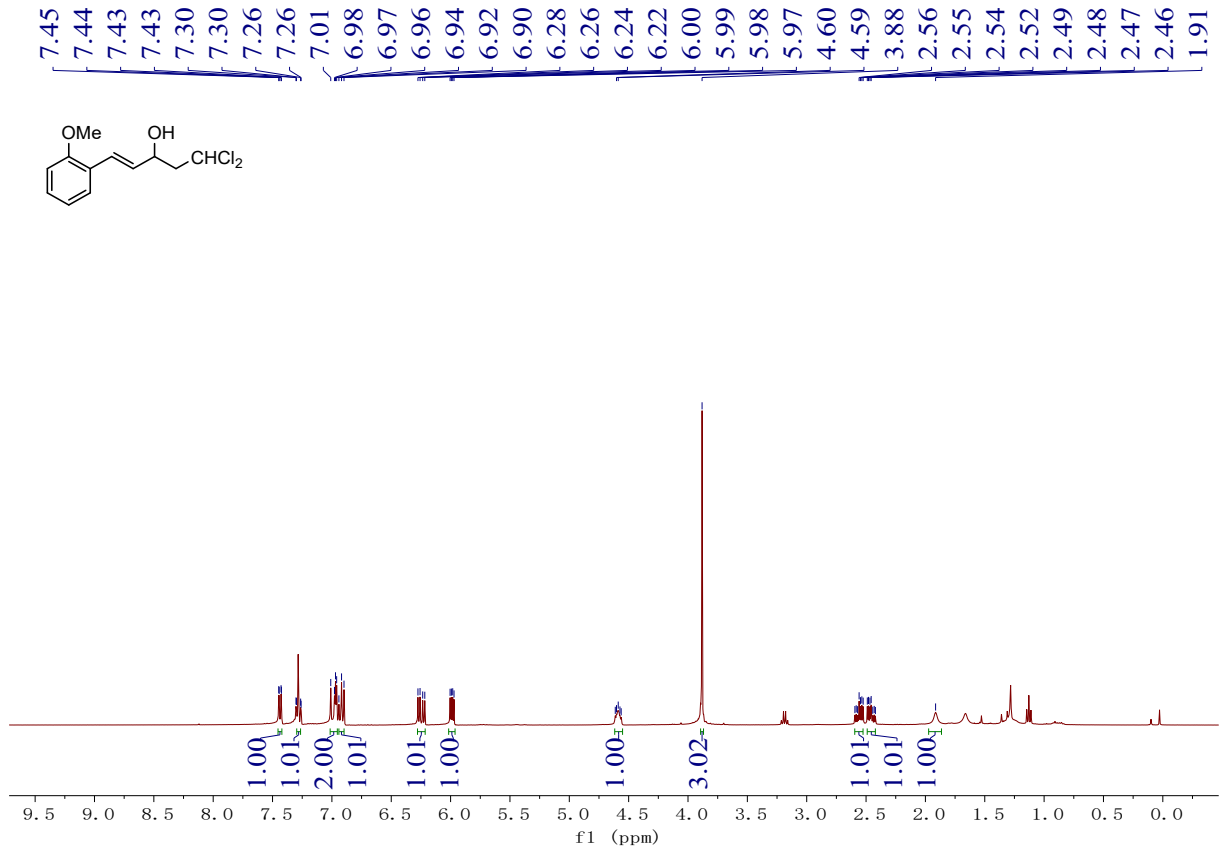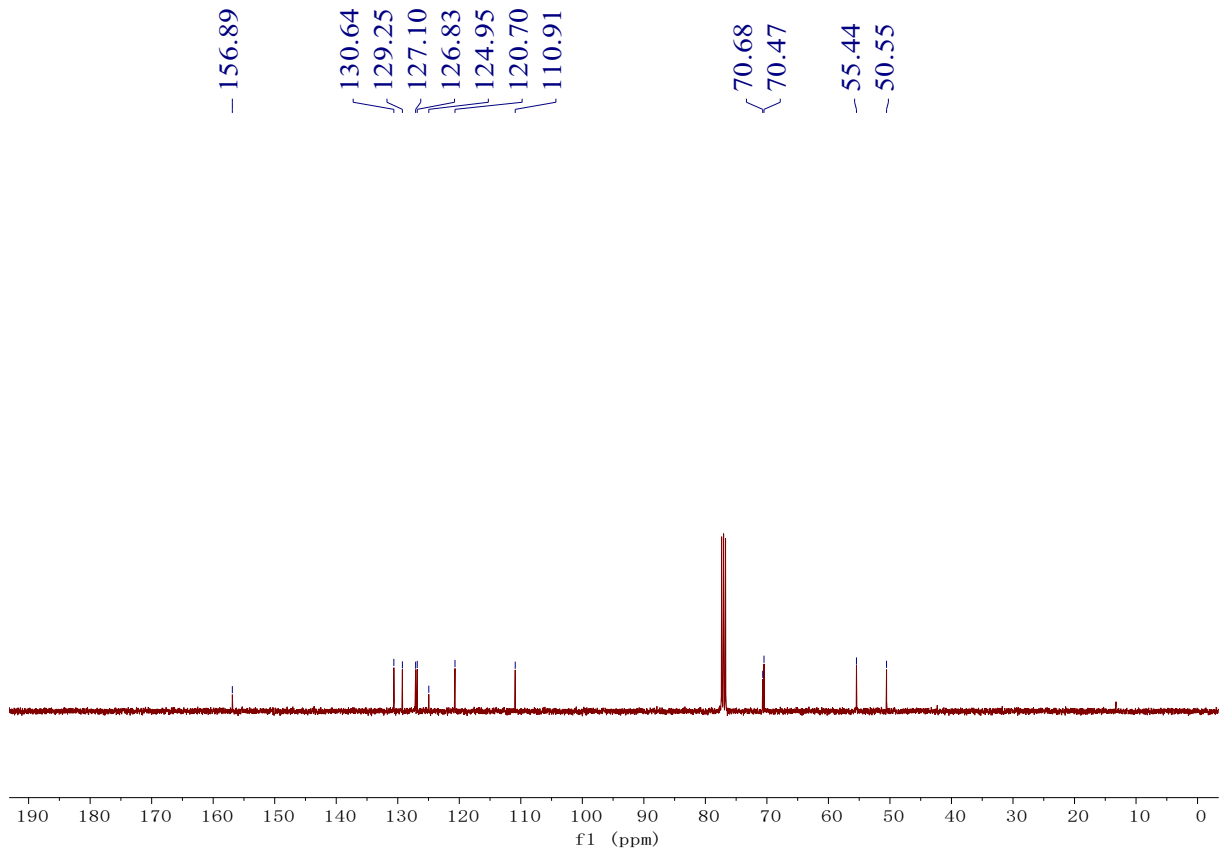

41

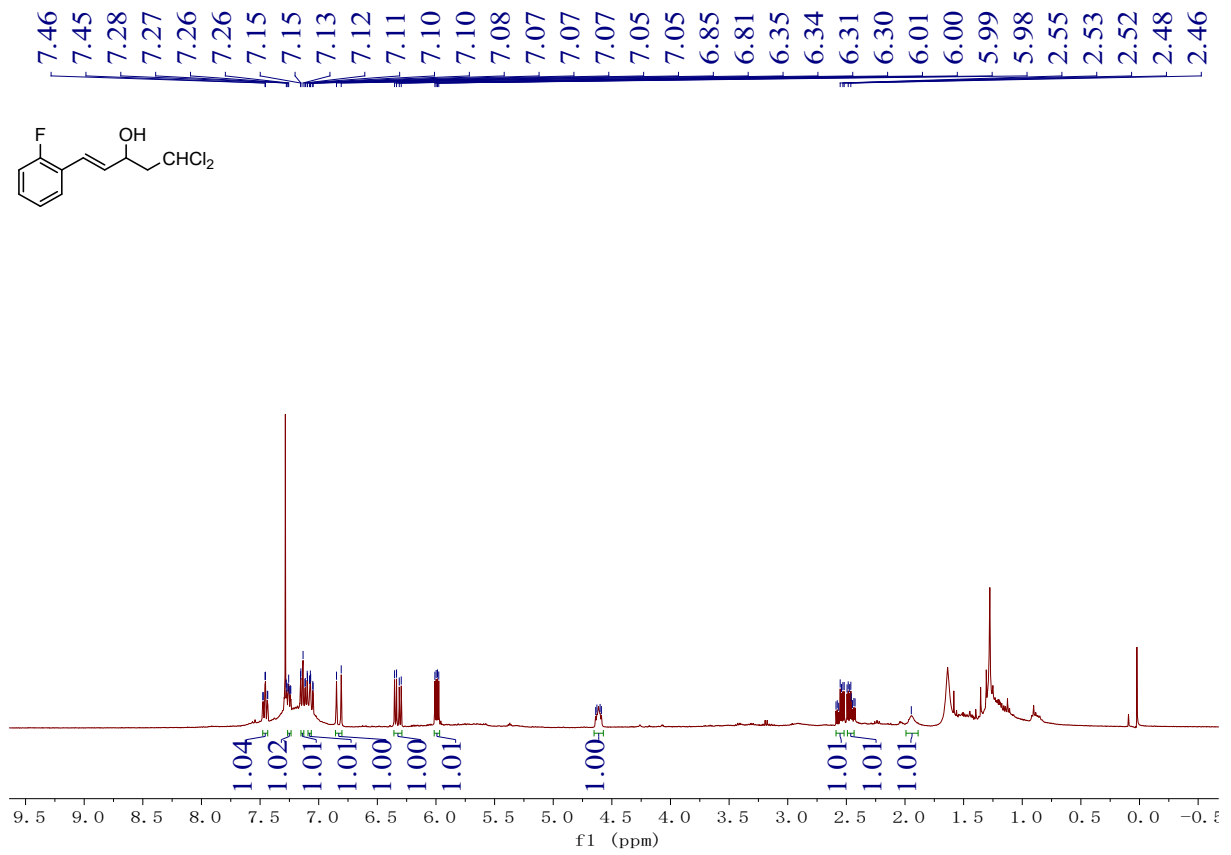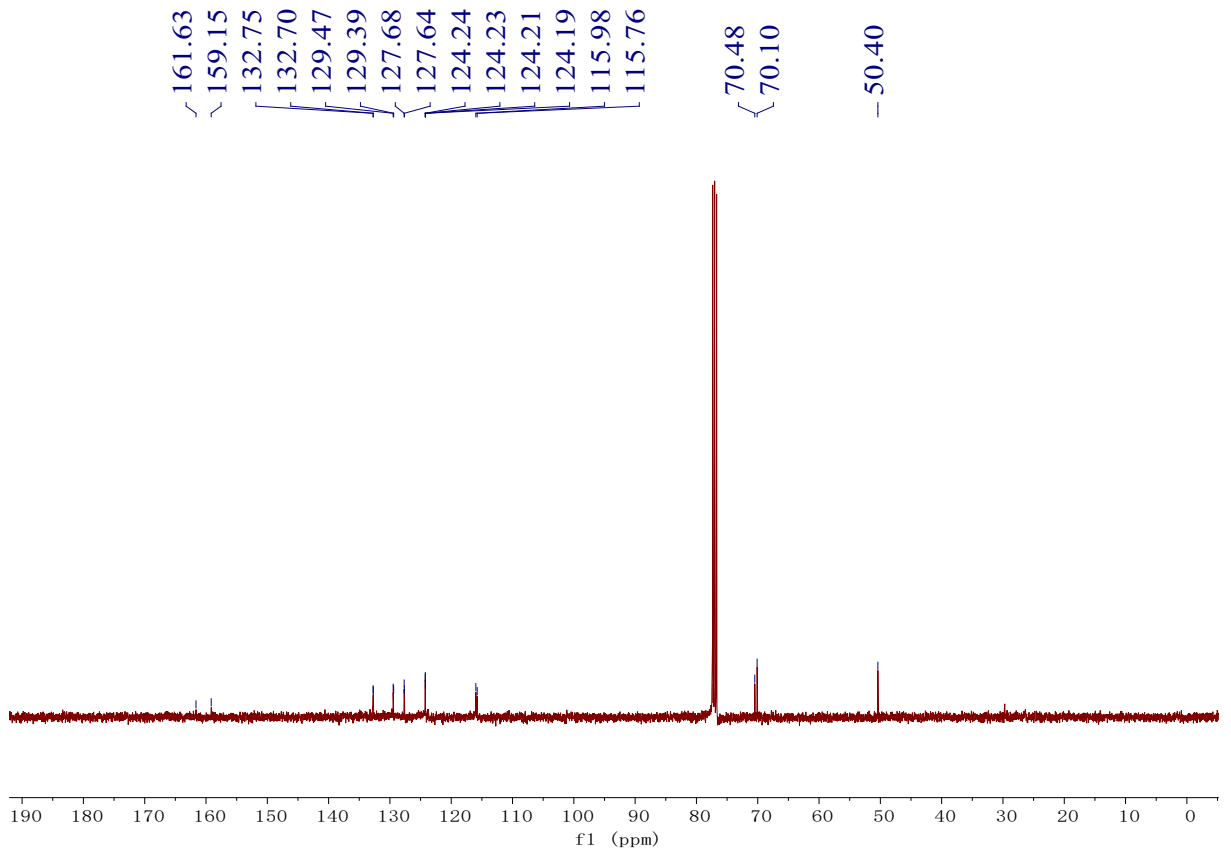

4m

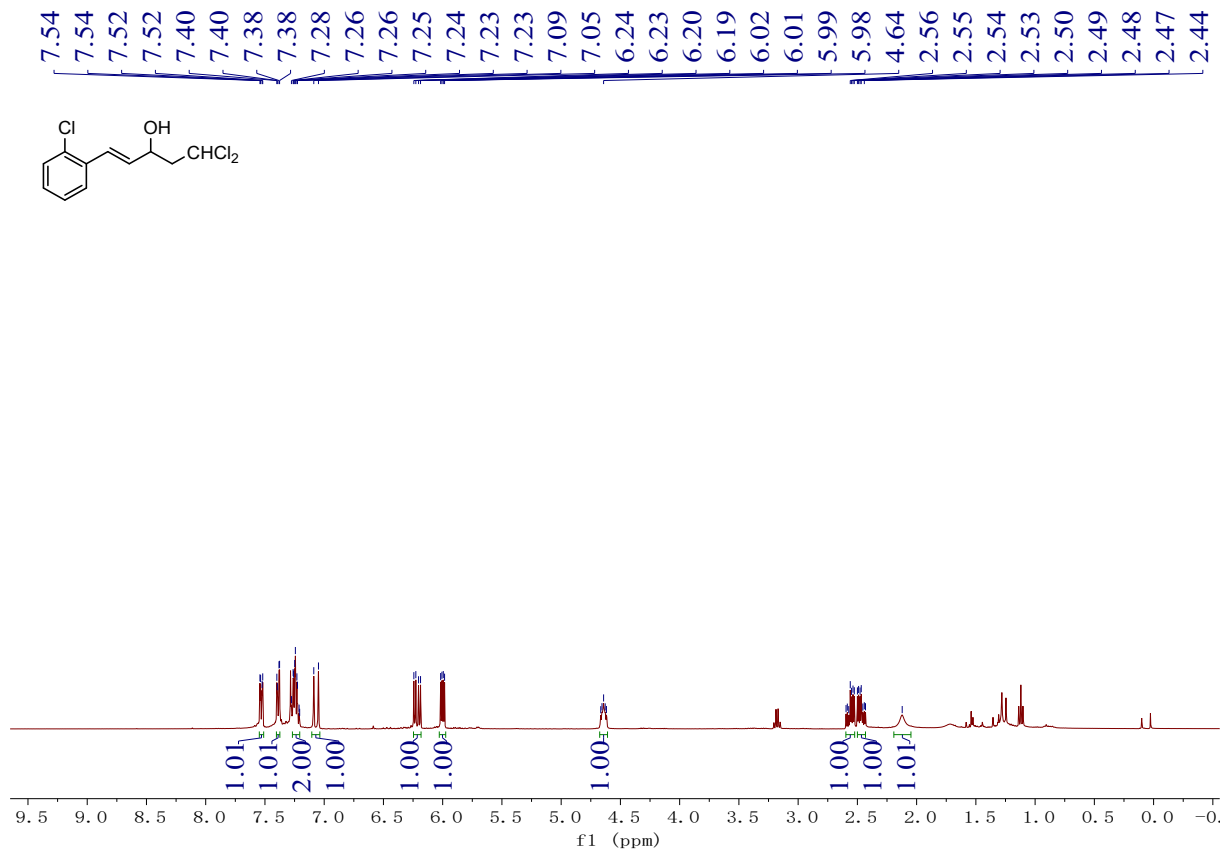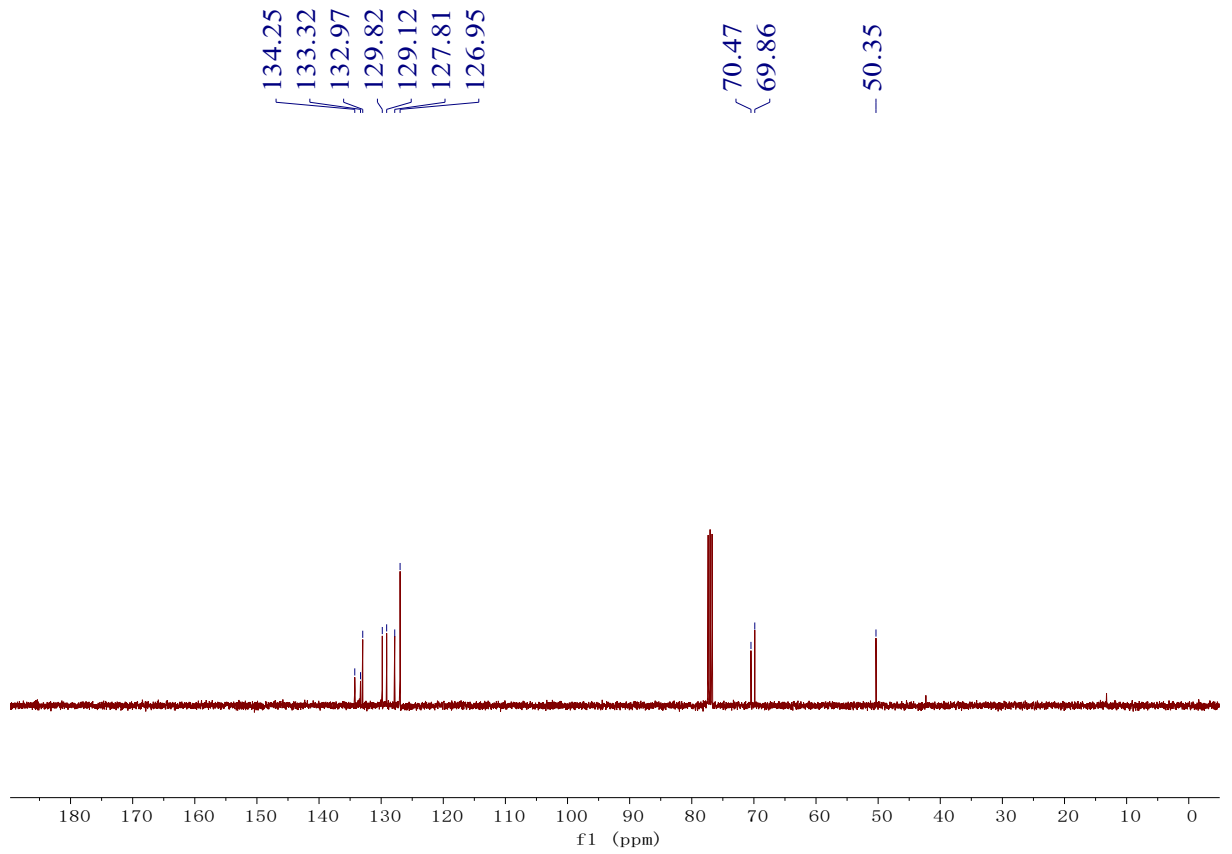

4n

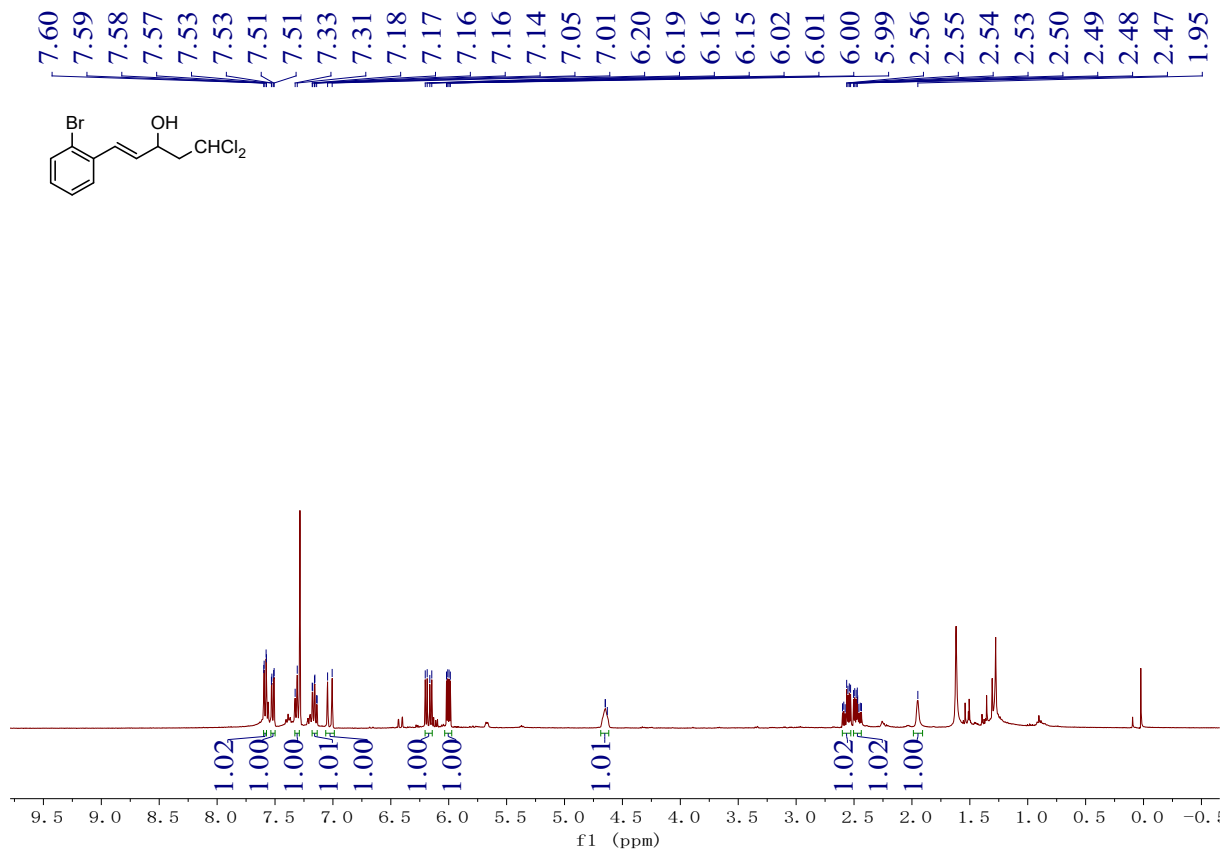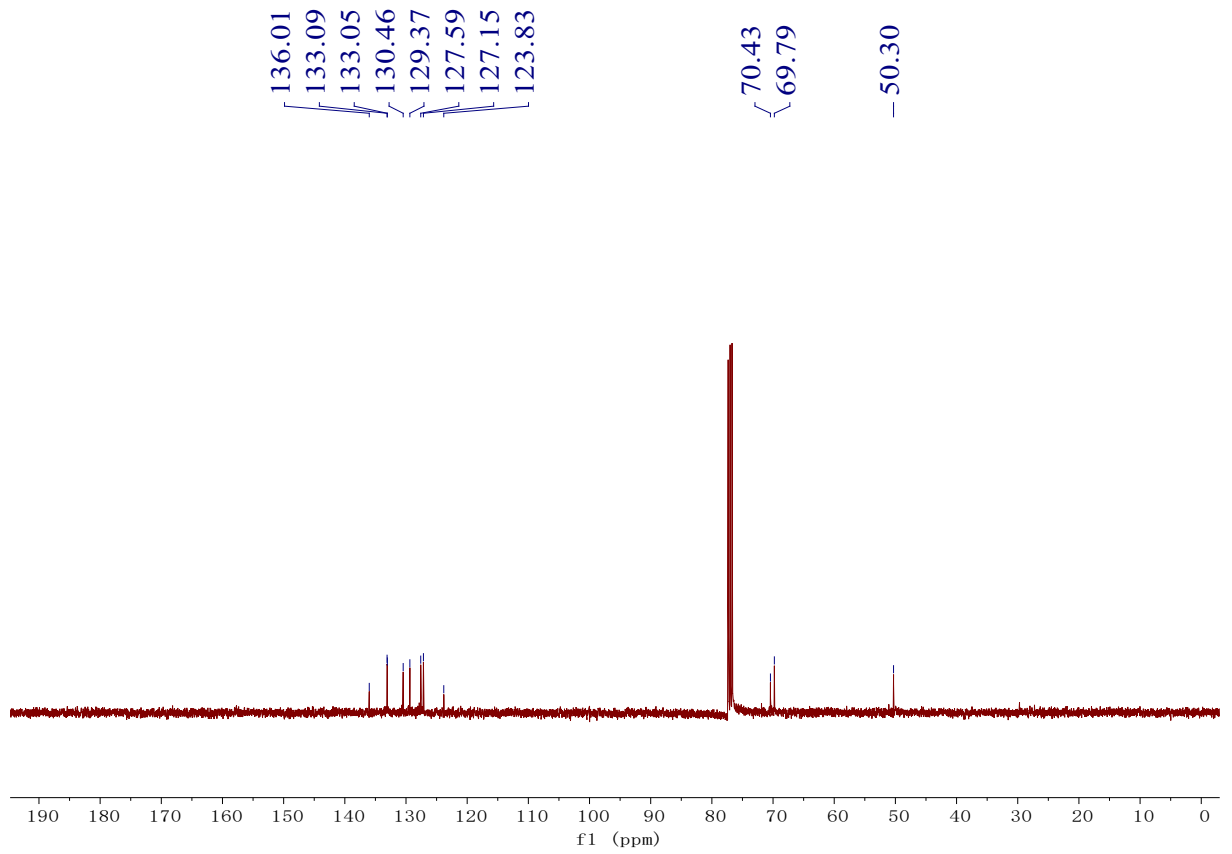



40

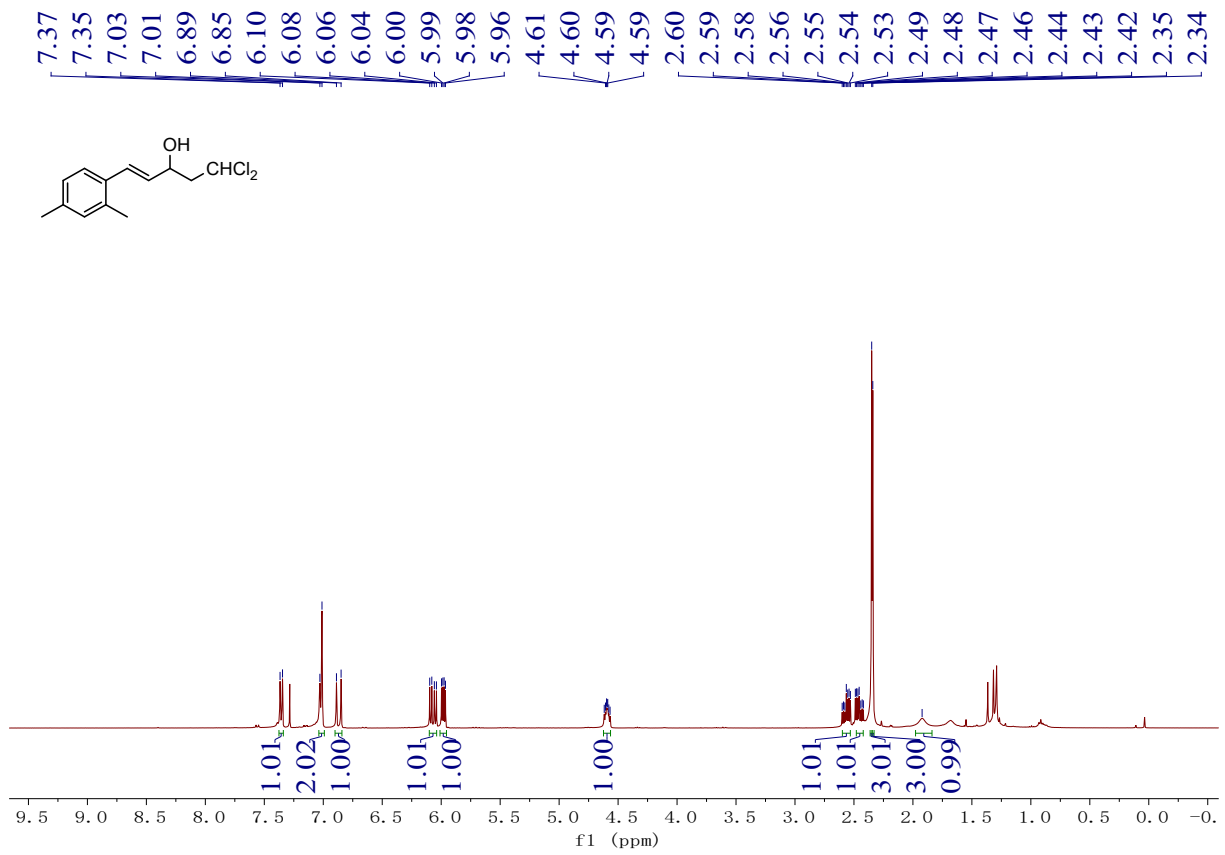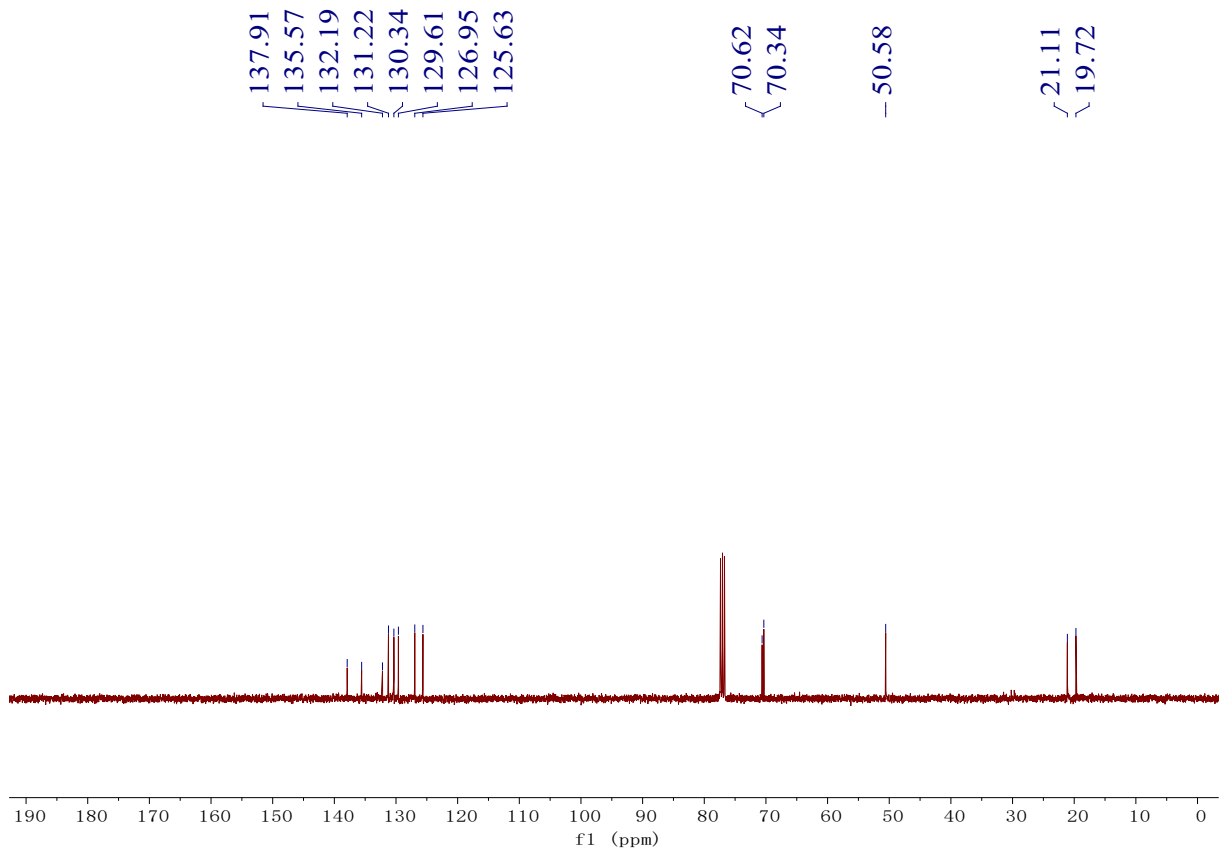

4p

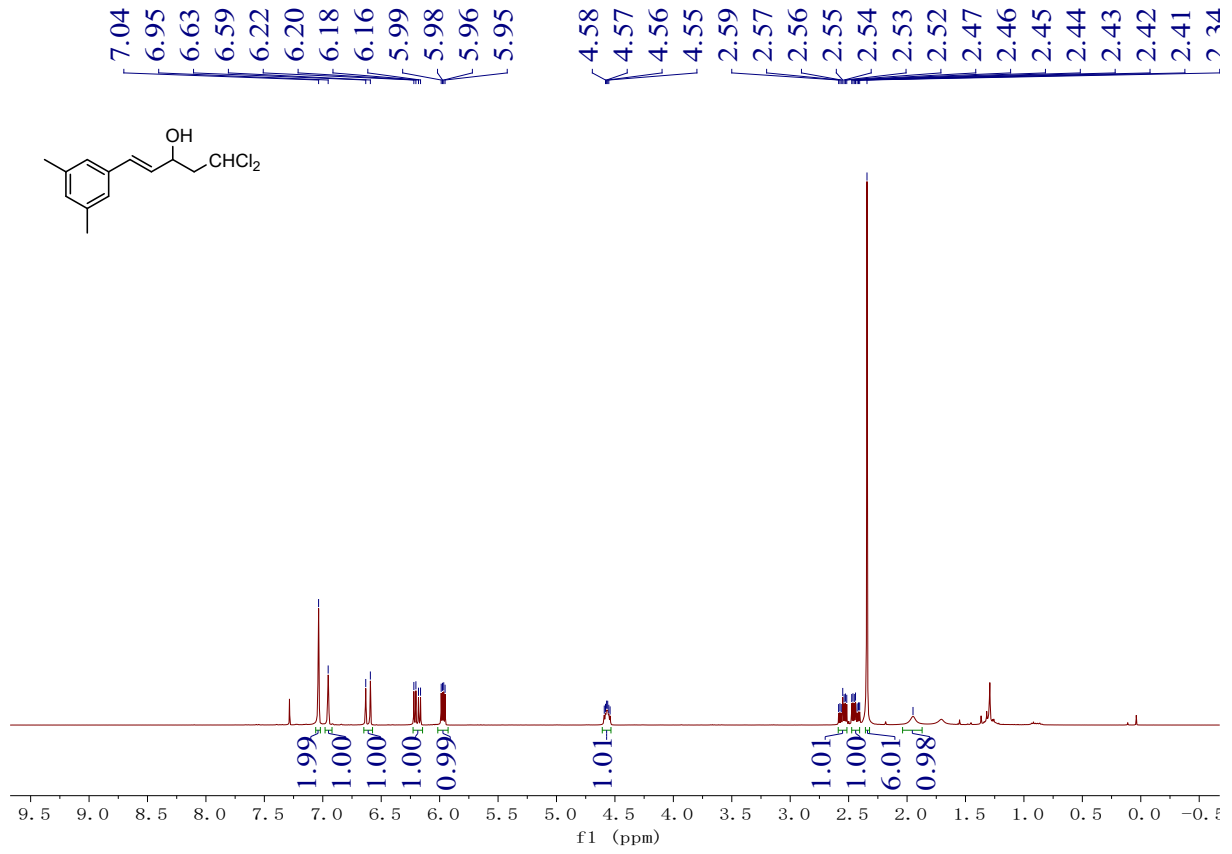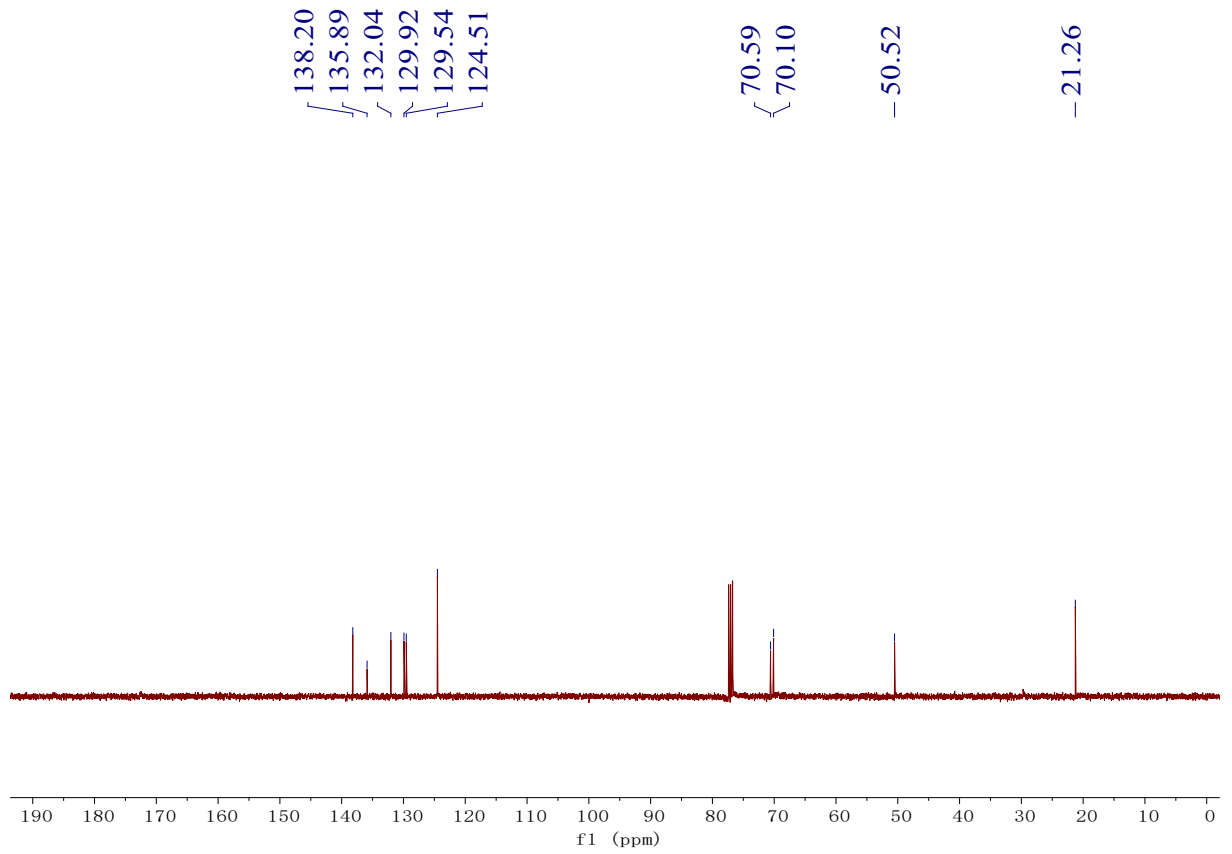

4q

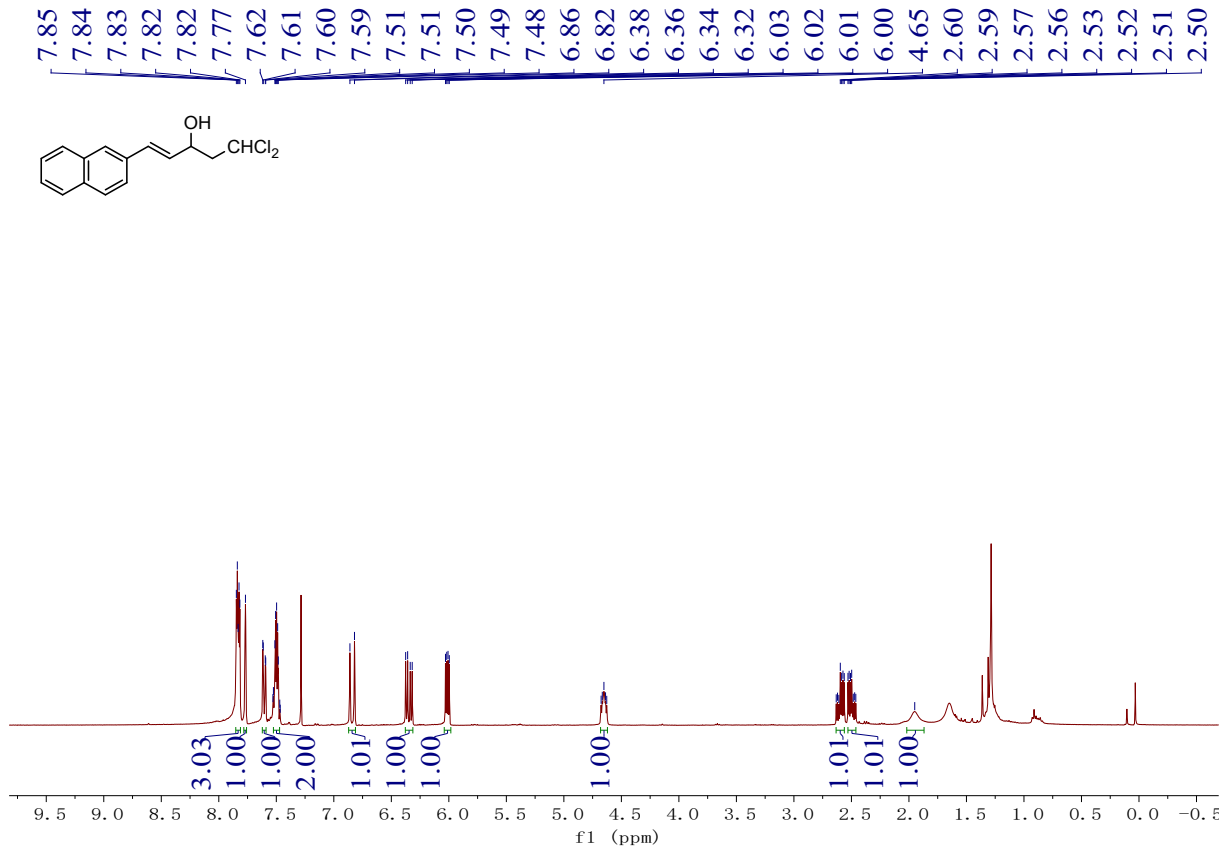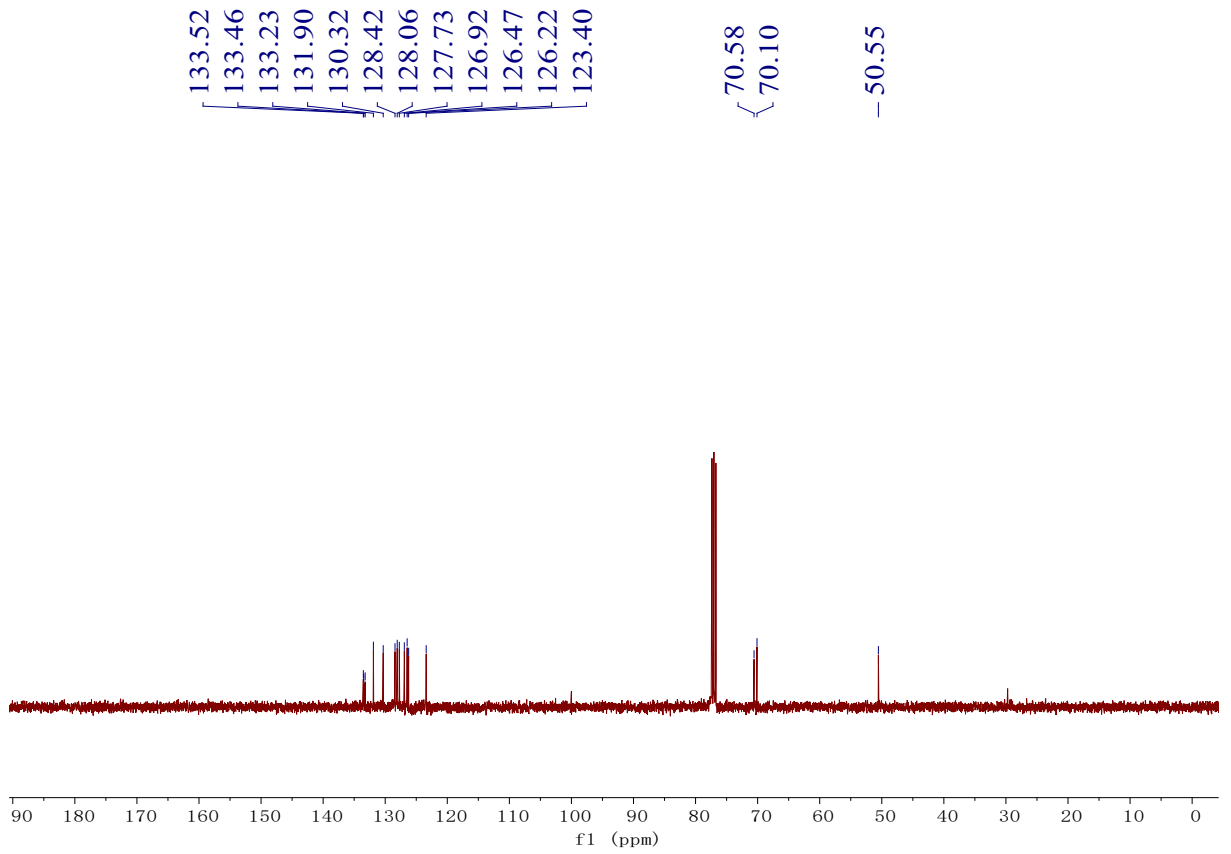

4r

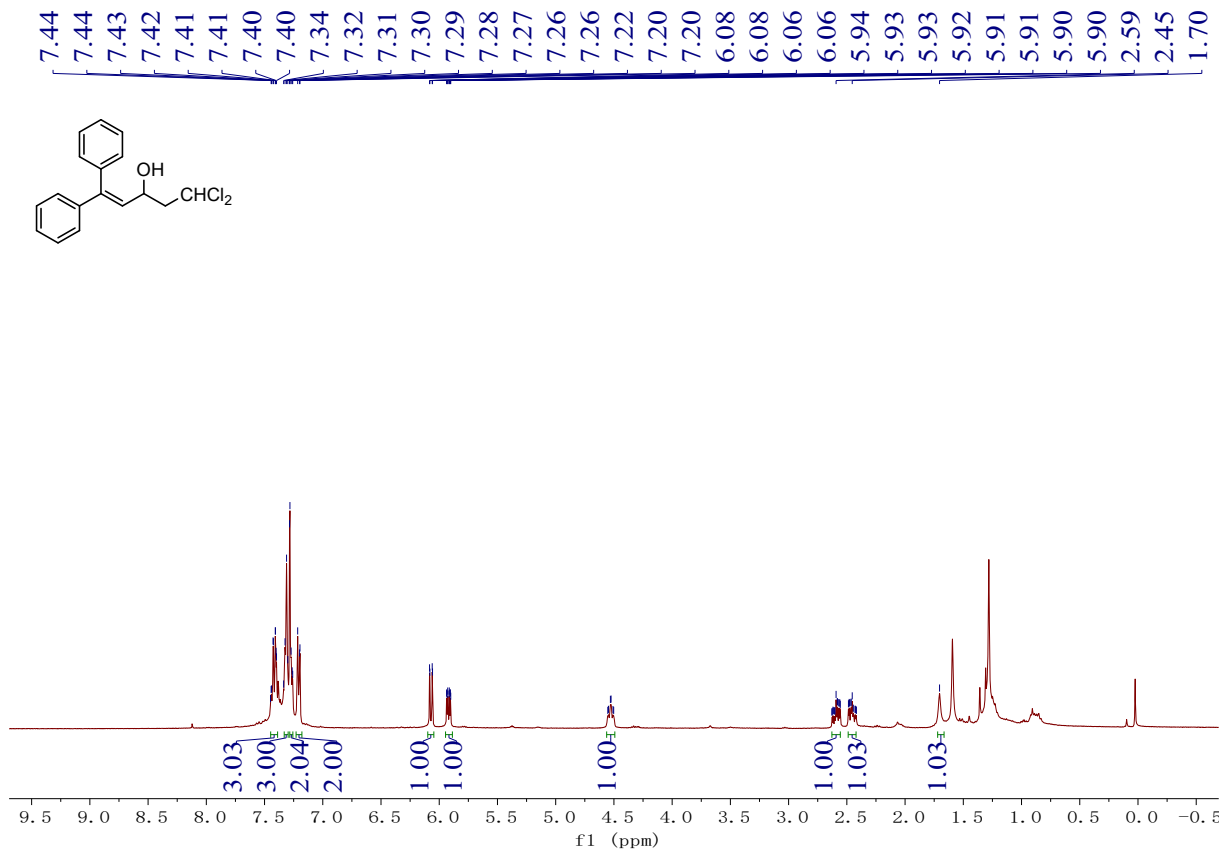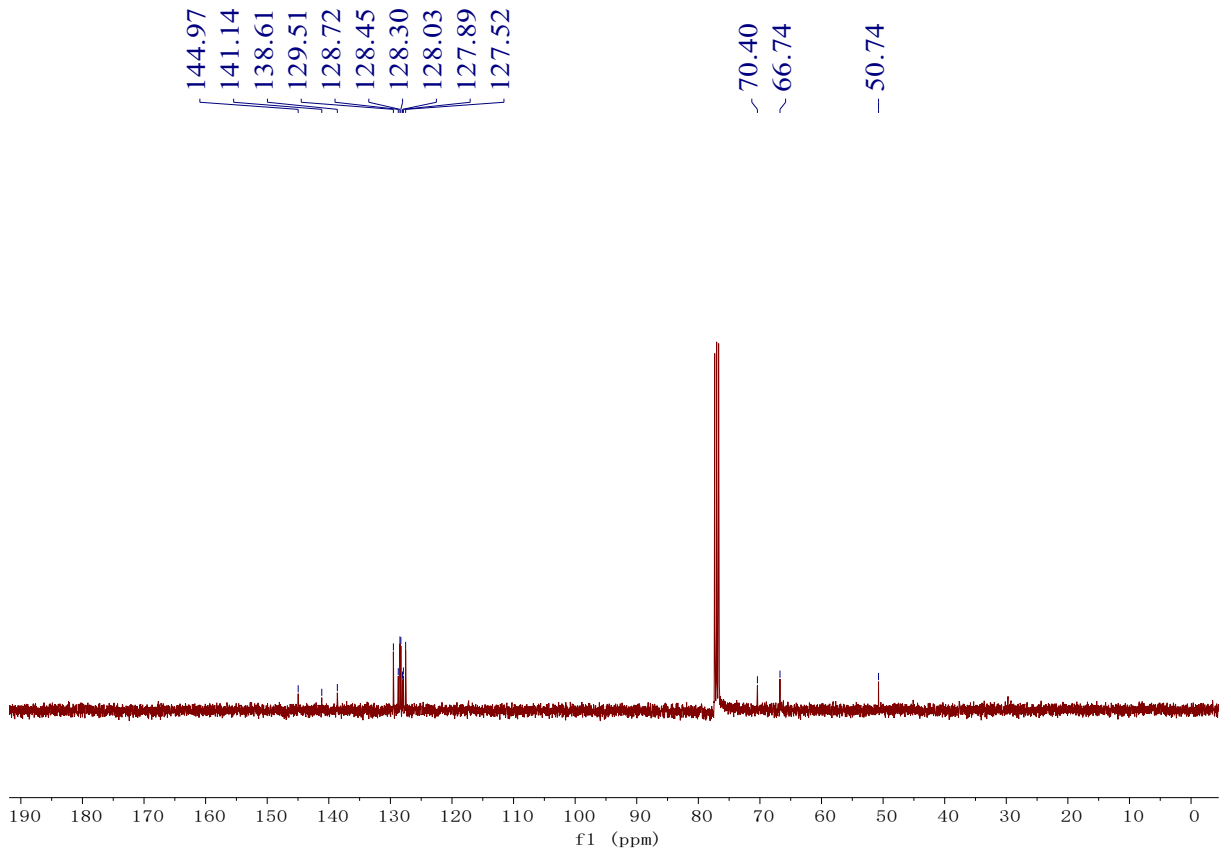

4s

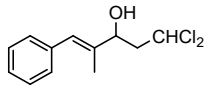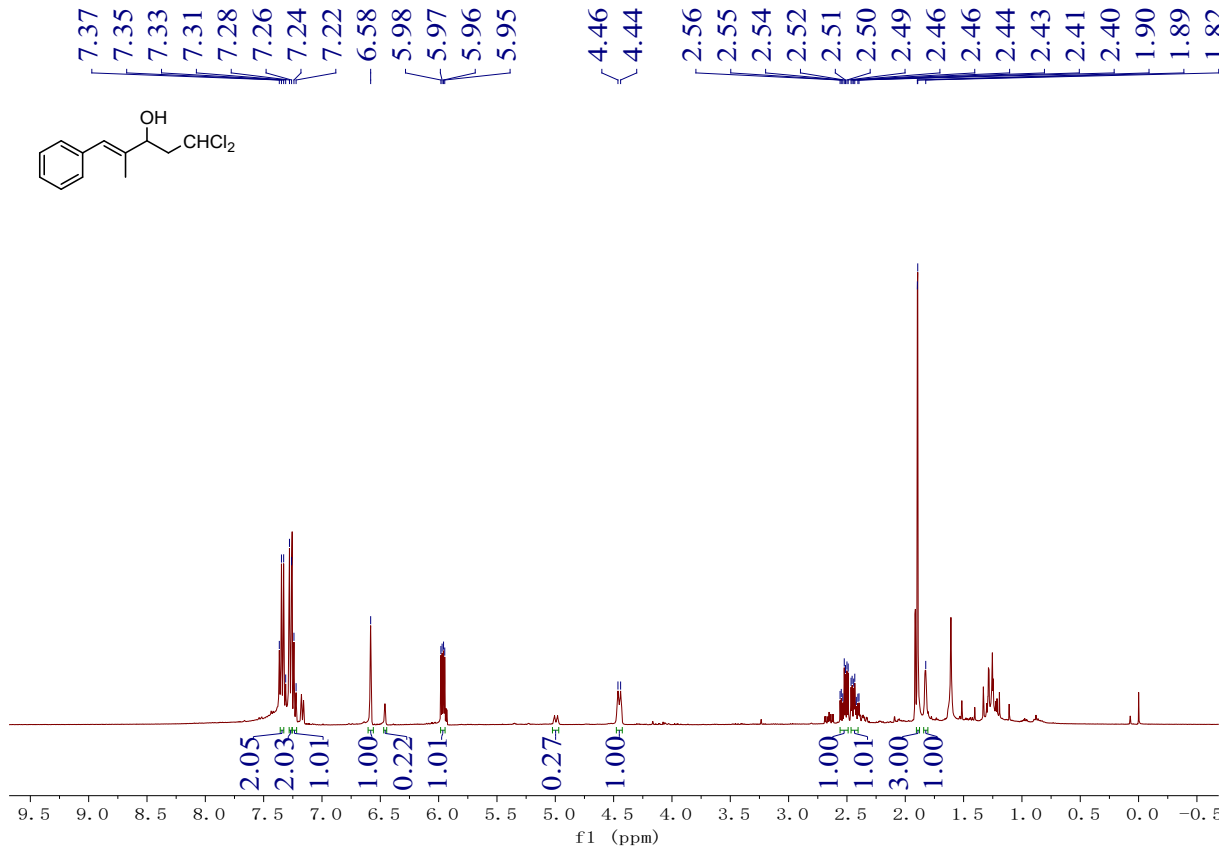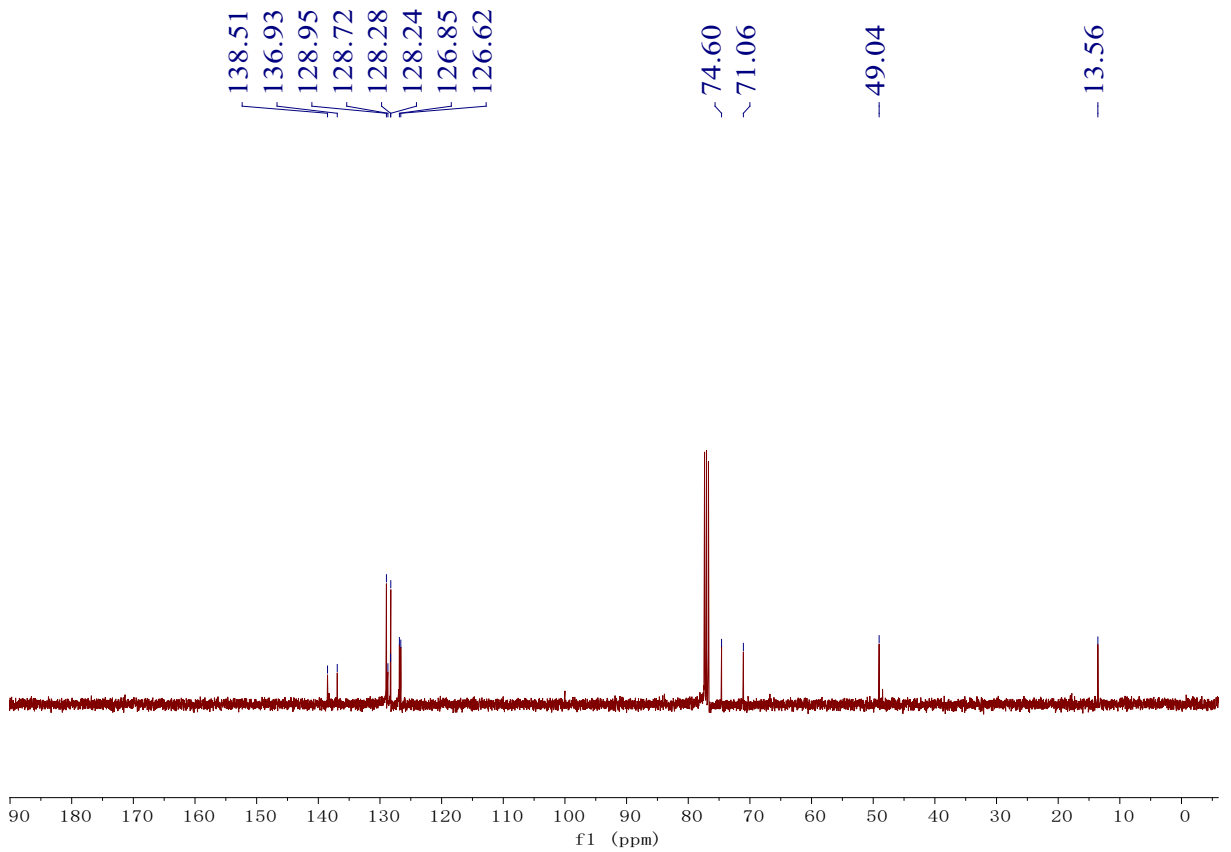

4t

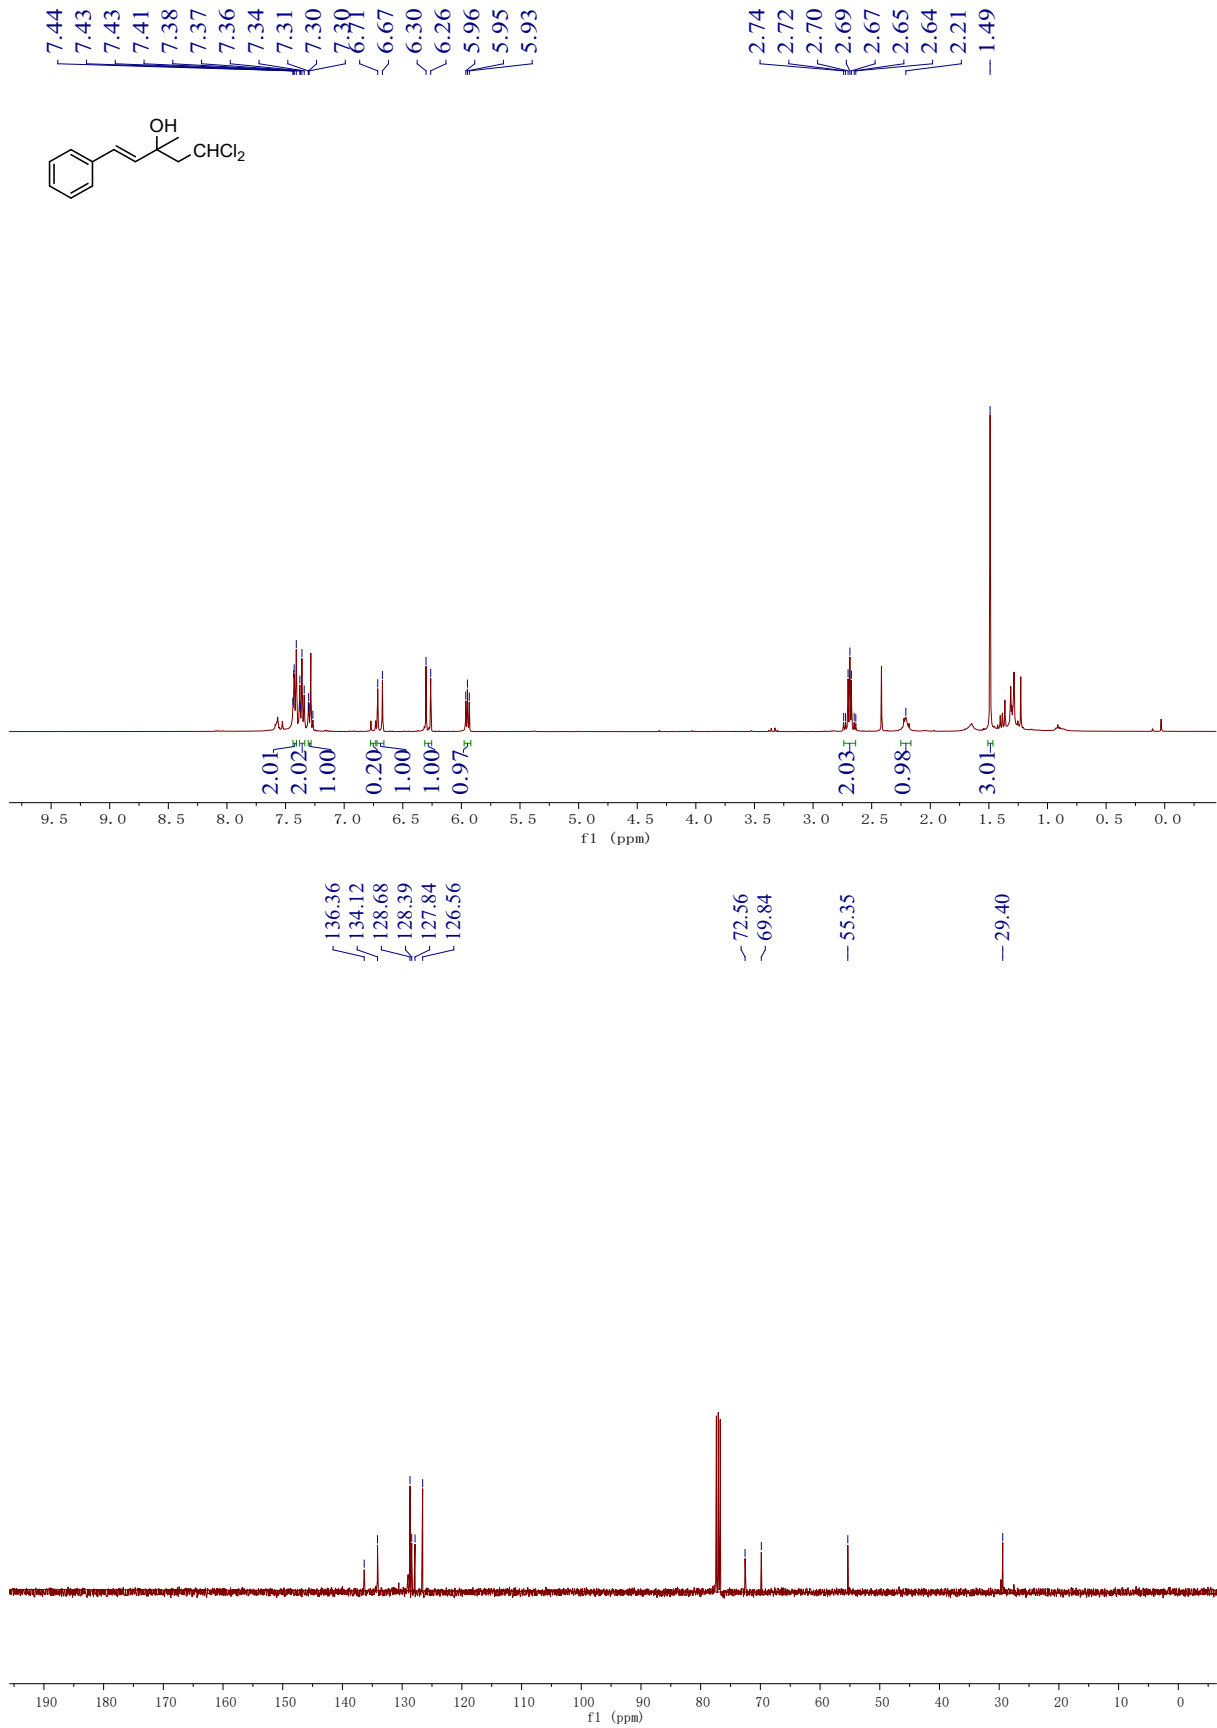

4w

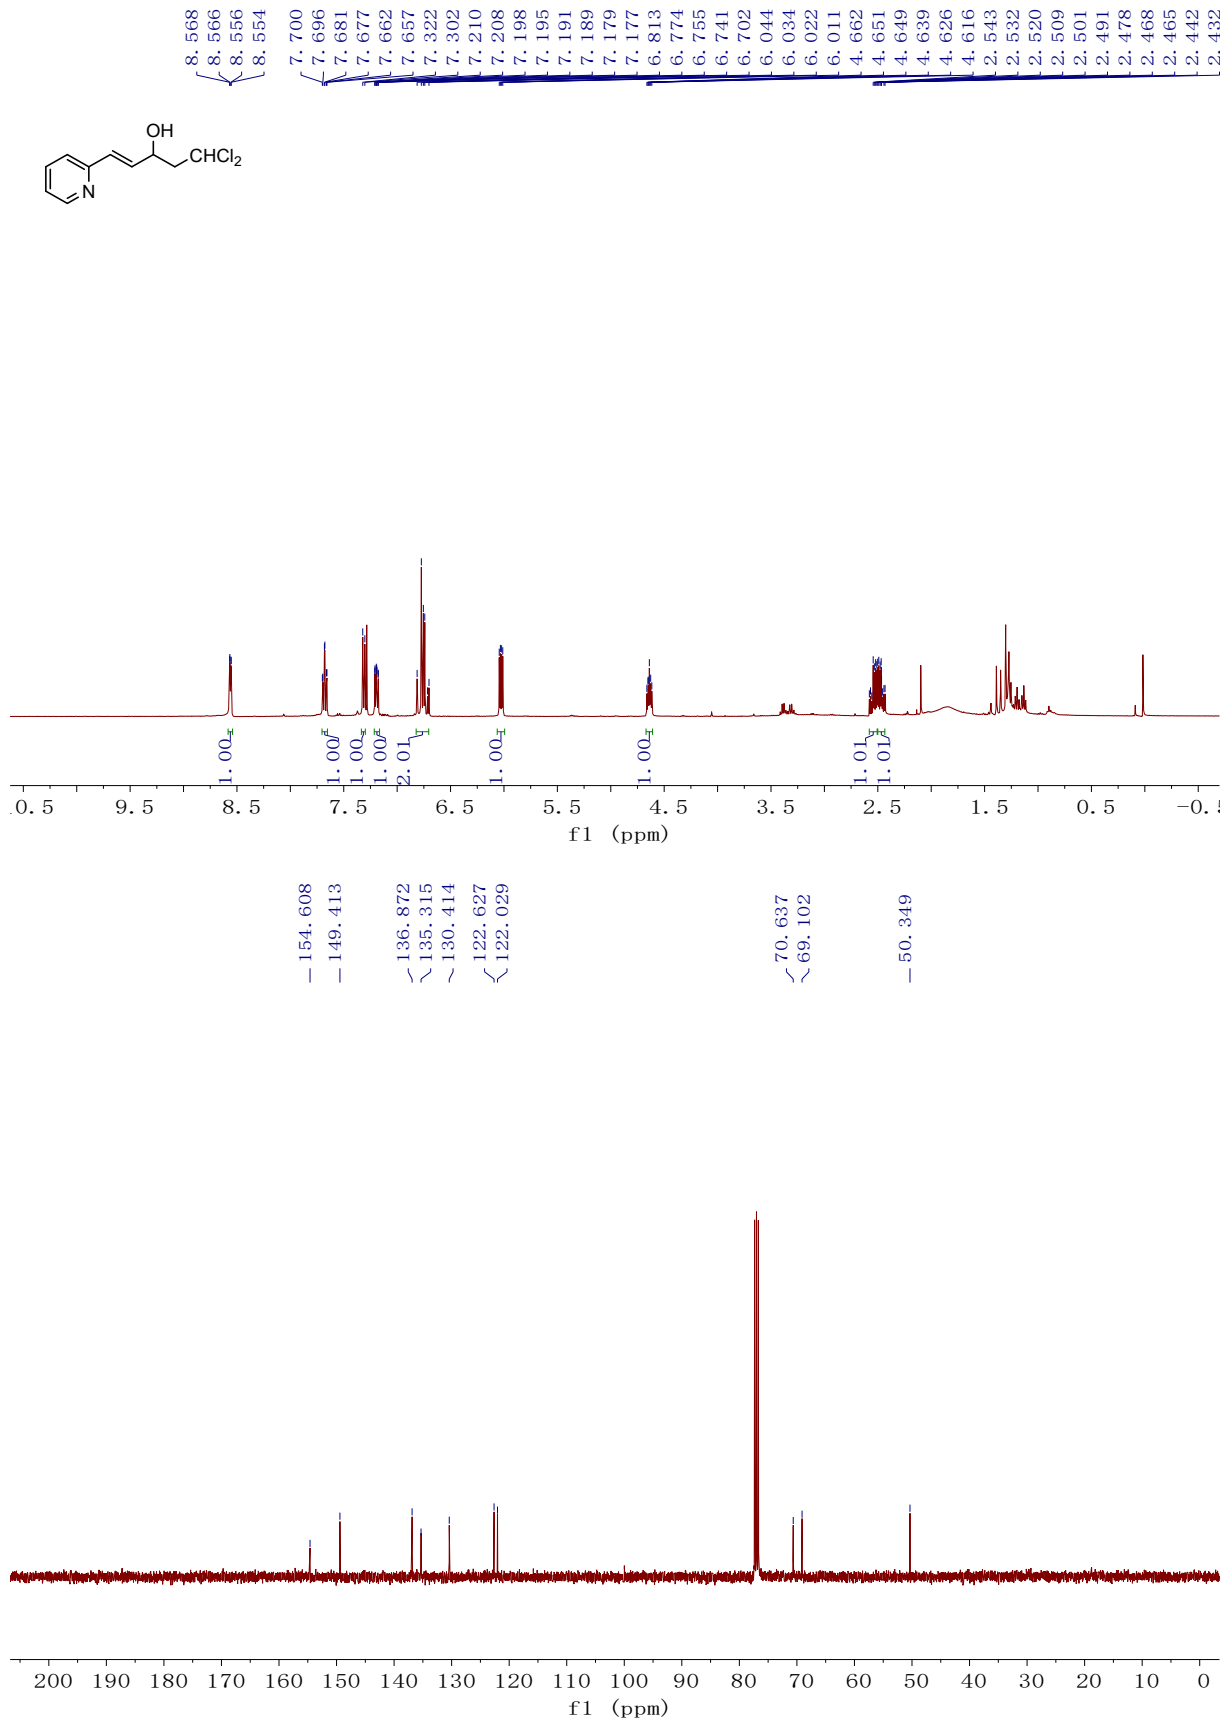

4x

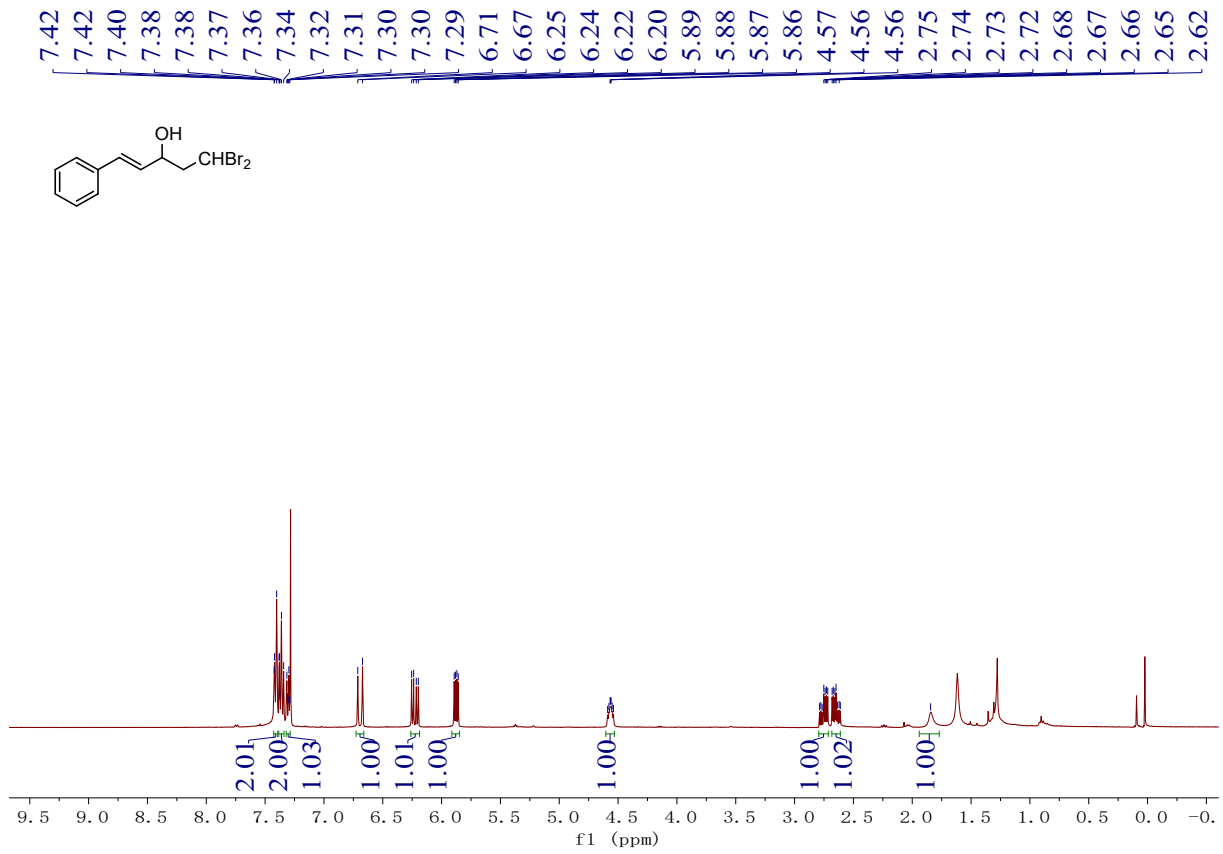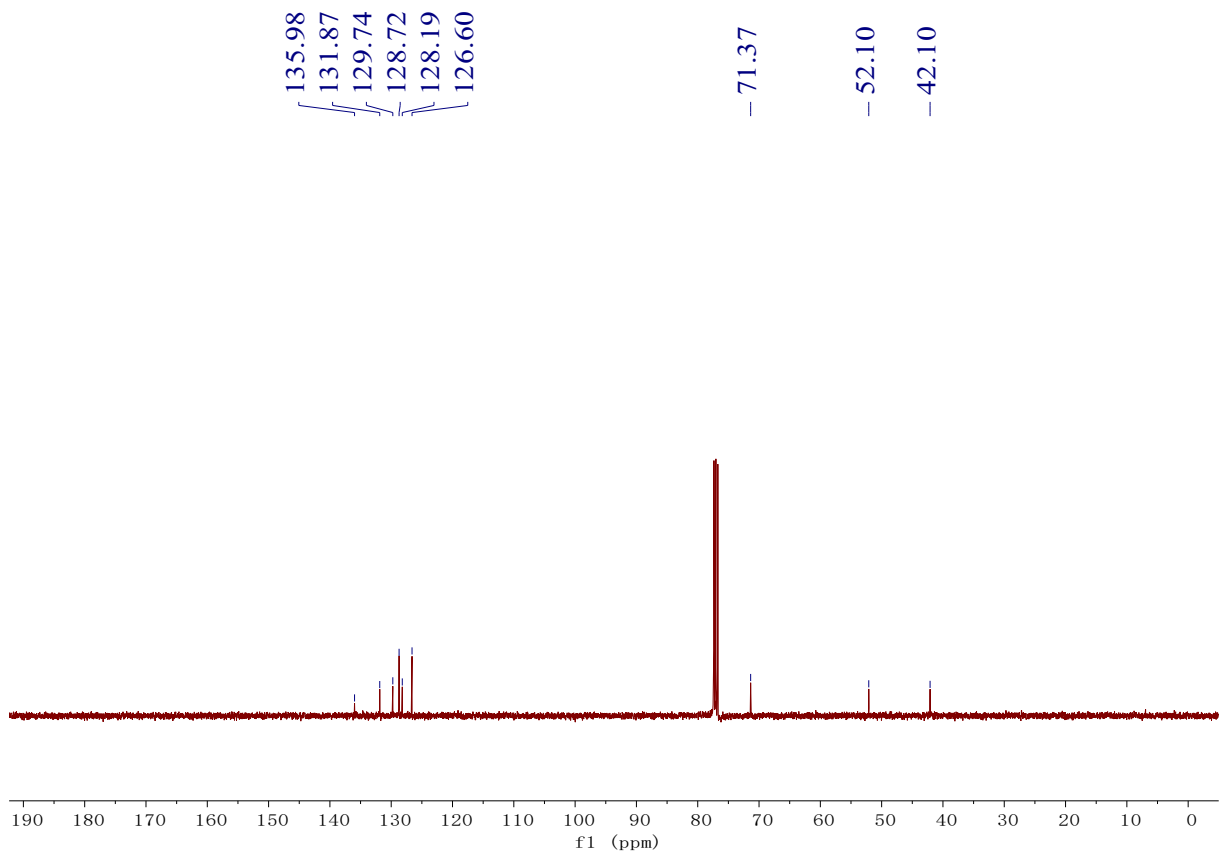



4y

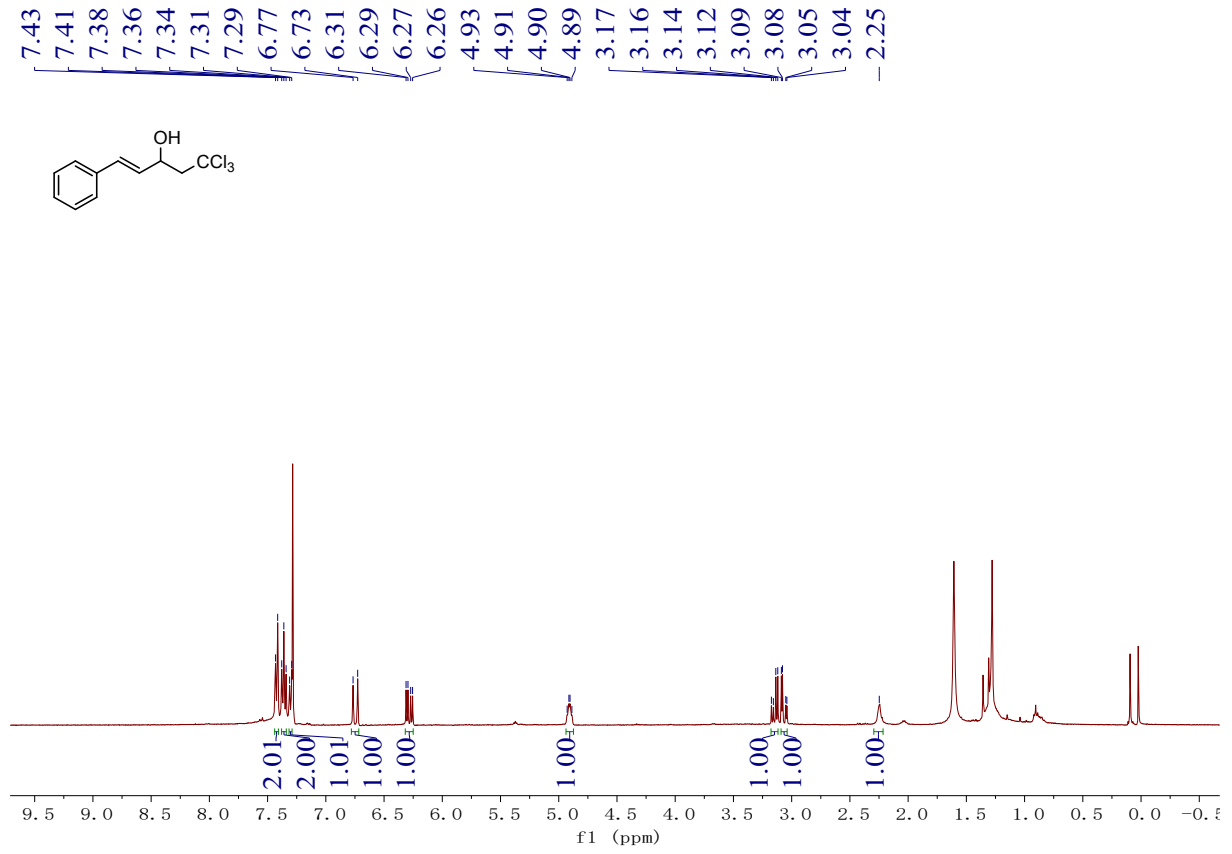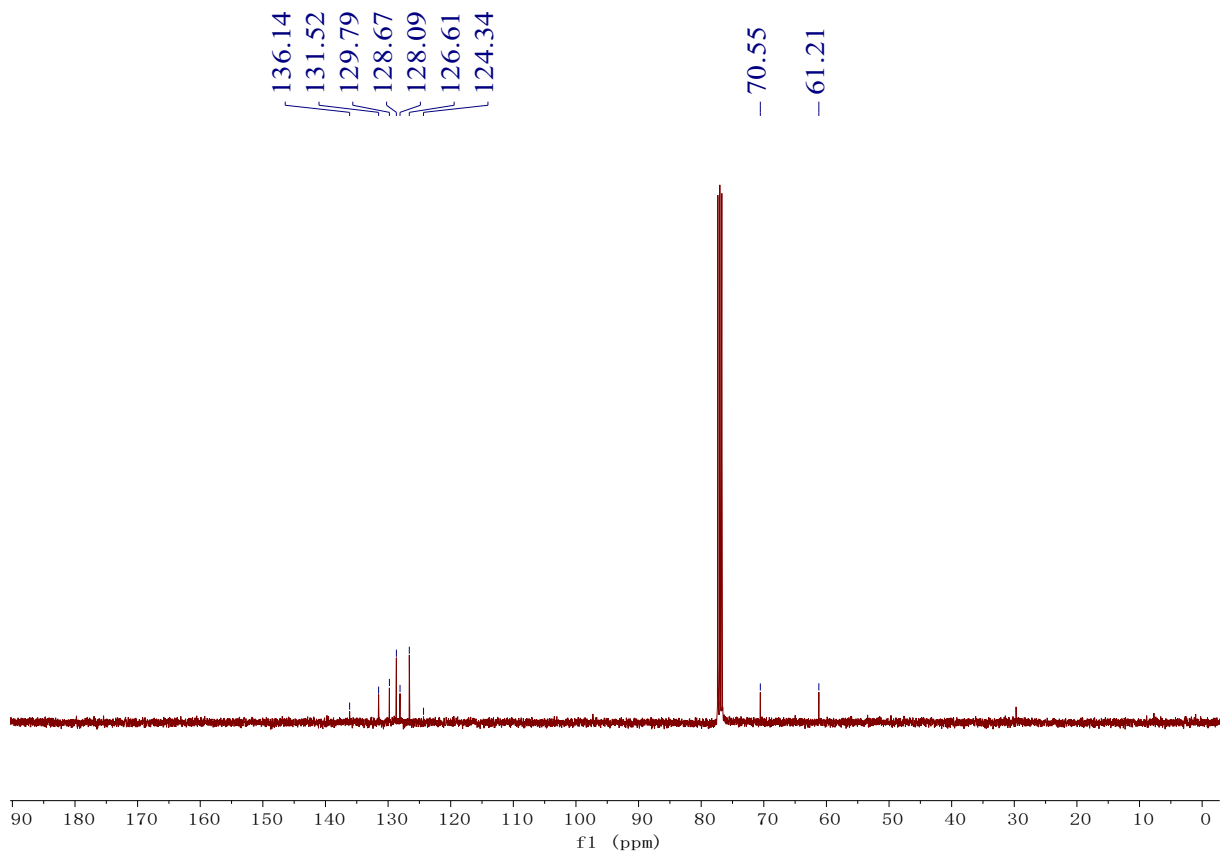

4aa

7.42  
7.42  
7.40  
7.38  
7.36  
7.34  
7.31  
7.30  
7.30  
6.70  
6.66  
6.26  
6.24  
6.22  
6.20  
4.62  
4.60  
4.57  
2.58  
2.56  
2.54  
2.52  
2.47  
2.46  
2.43  
2.42  
1.86

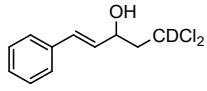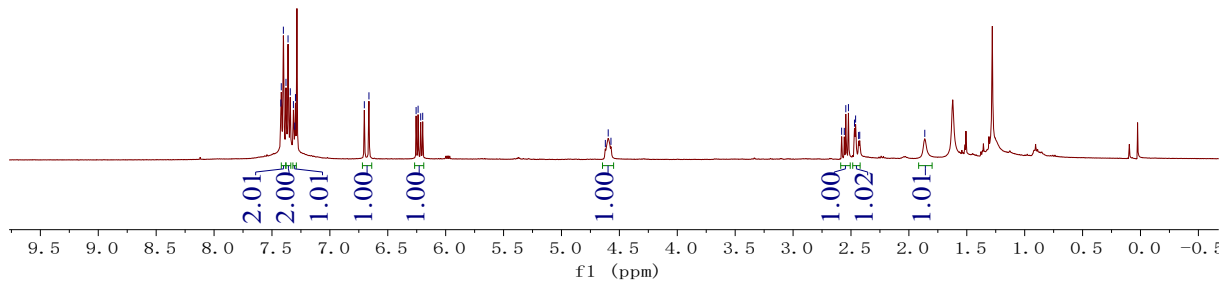

135.99  
131.80  
129.98  
128.70  
128.18  
126.60  
-70.00  
-50.36

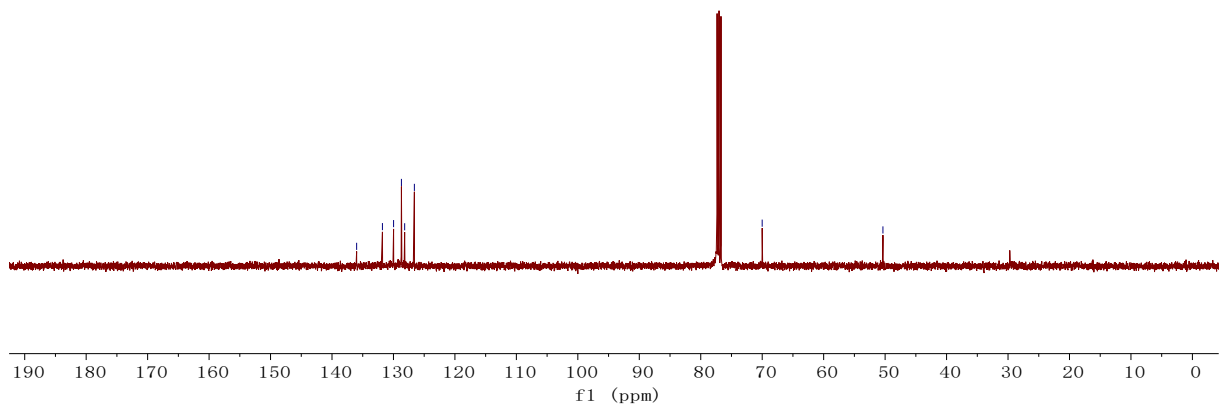

5a

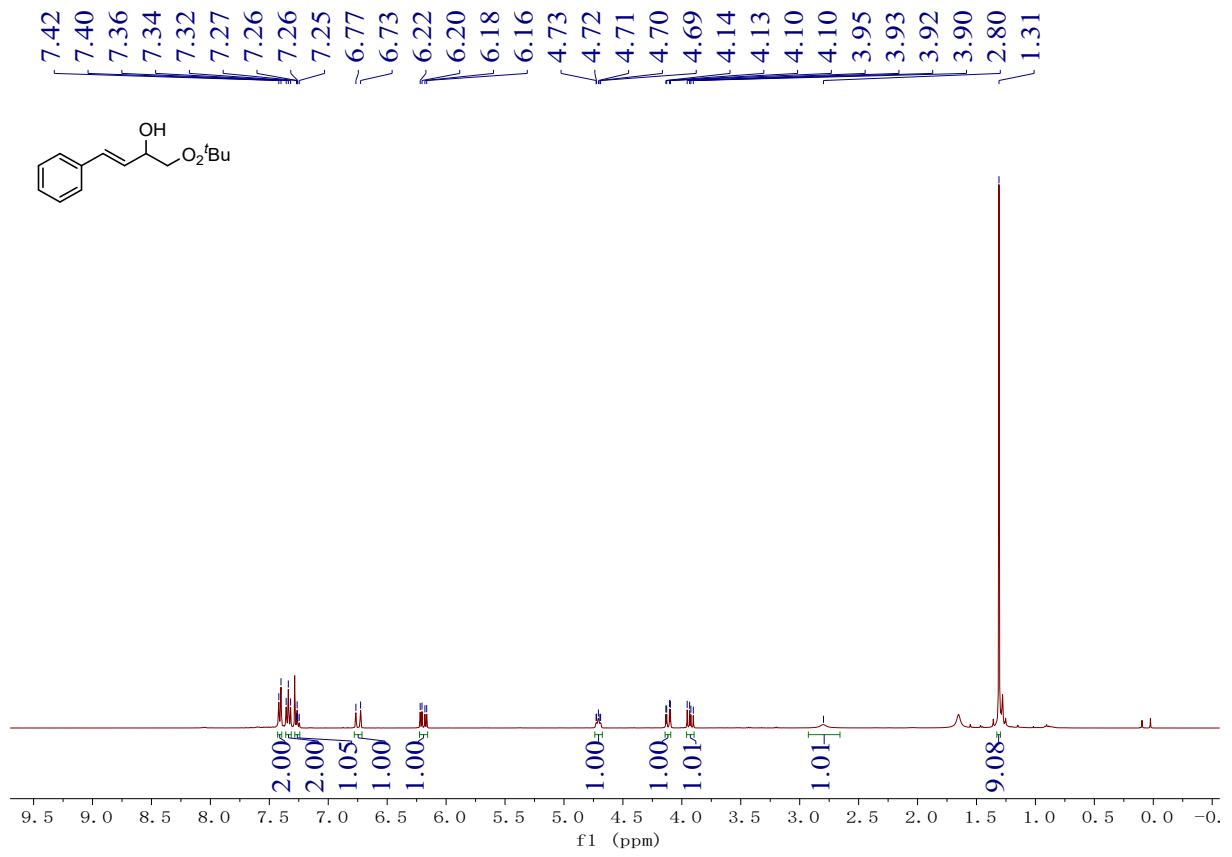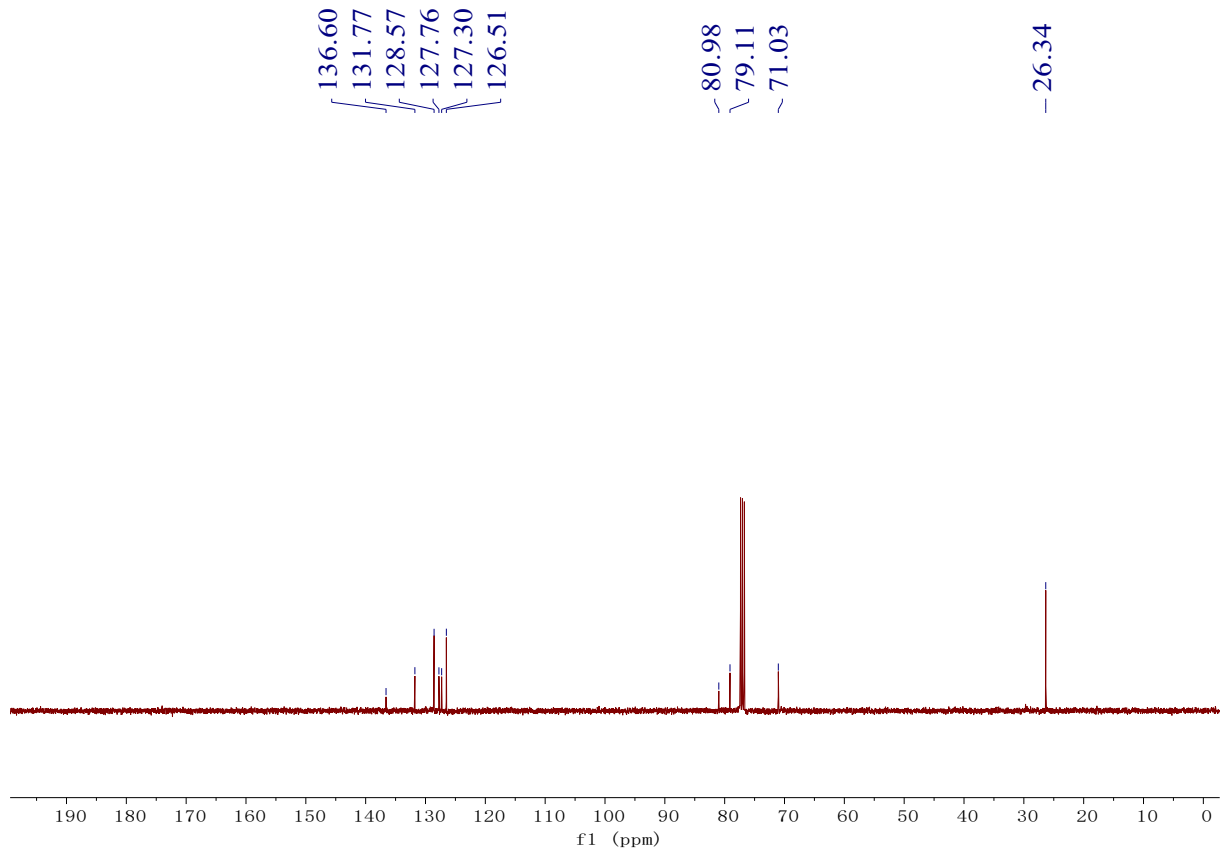

5b

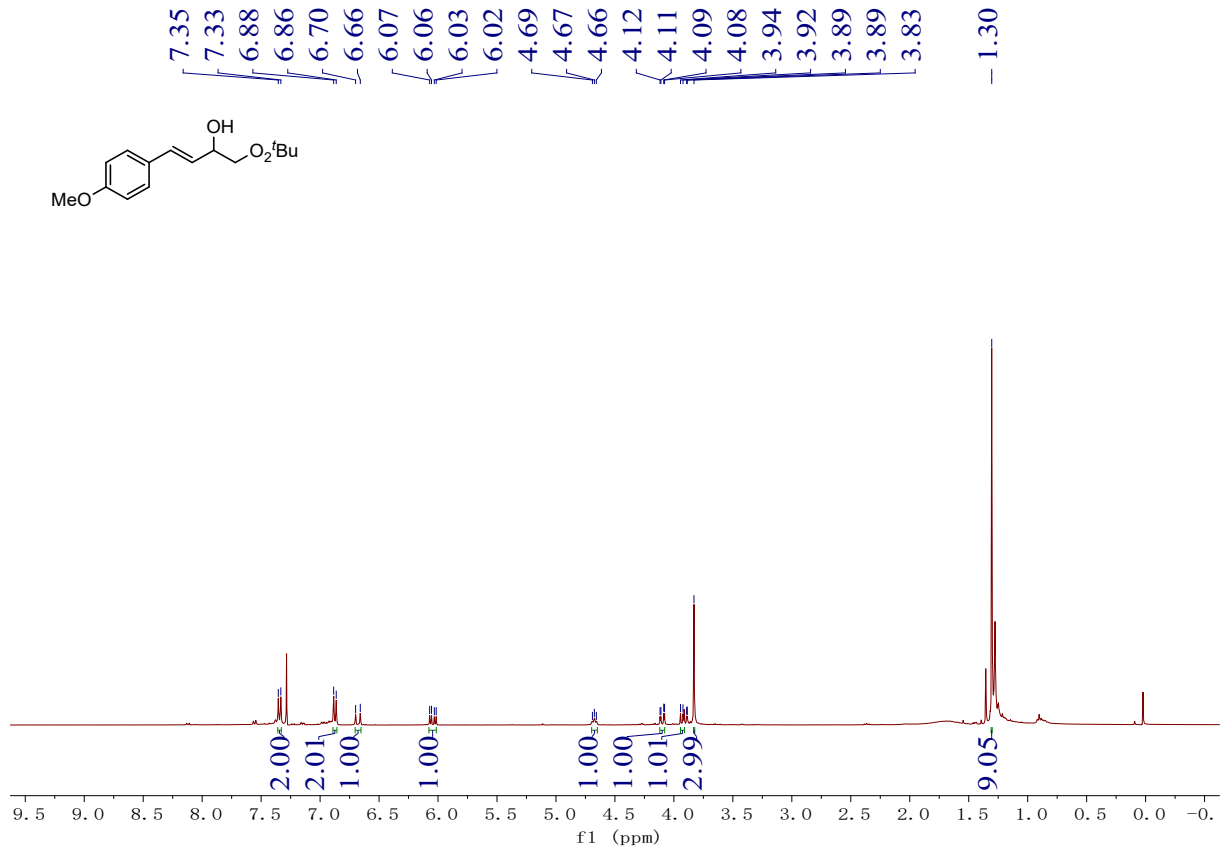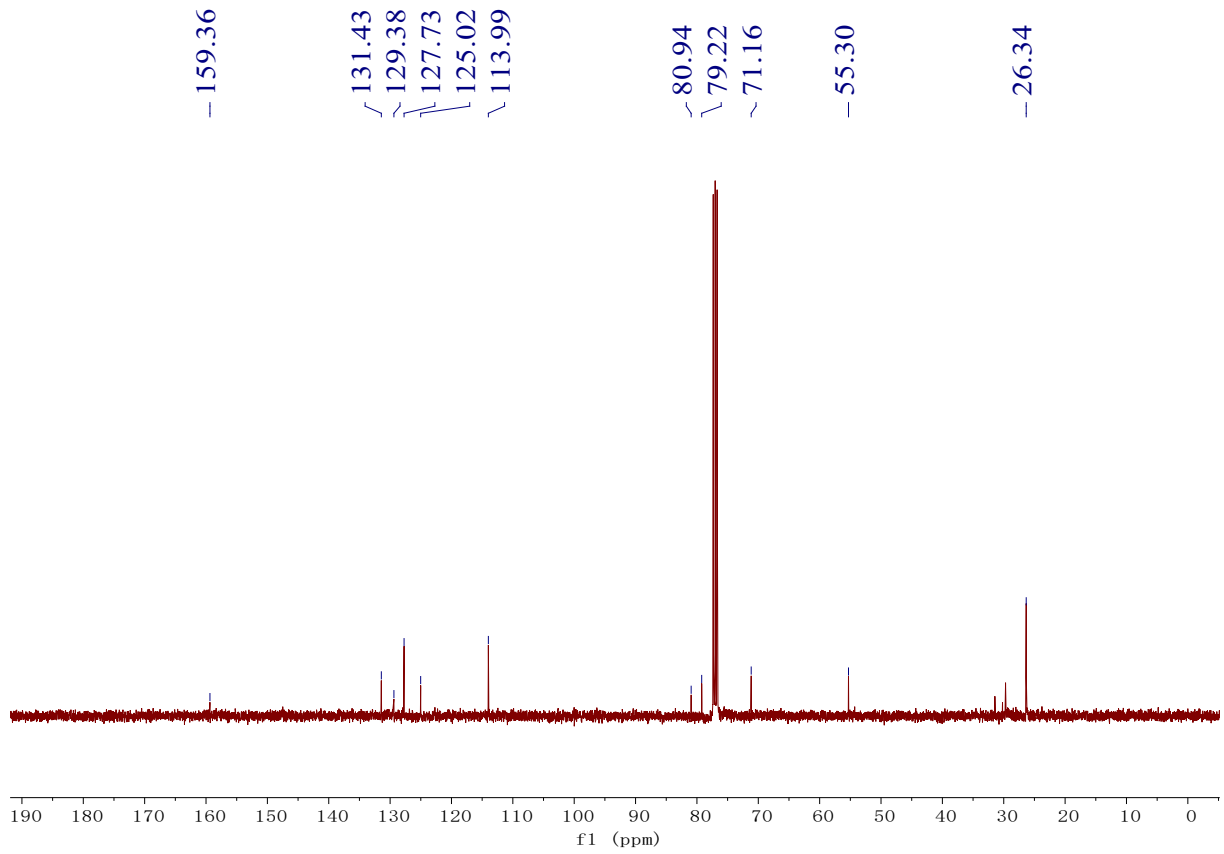

5c

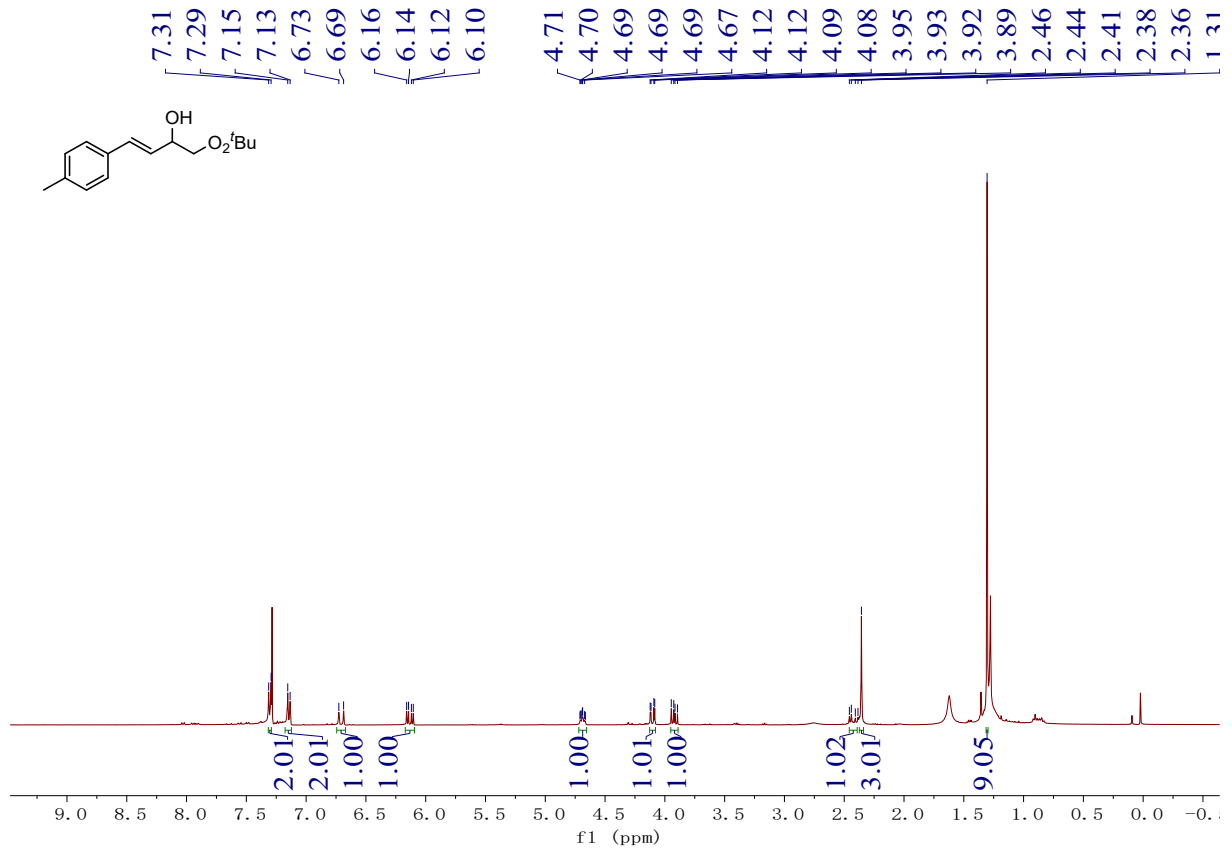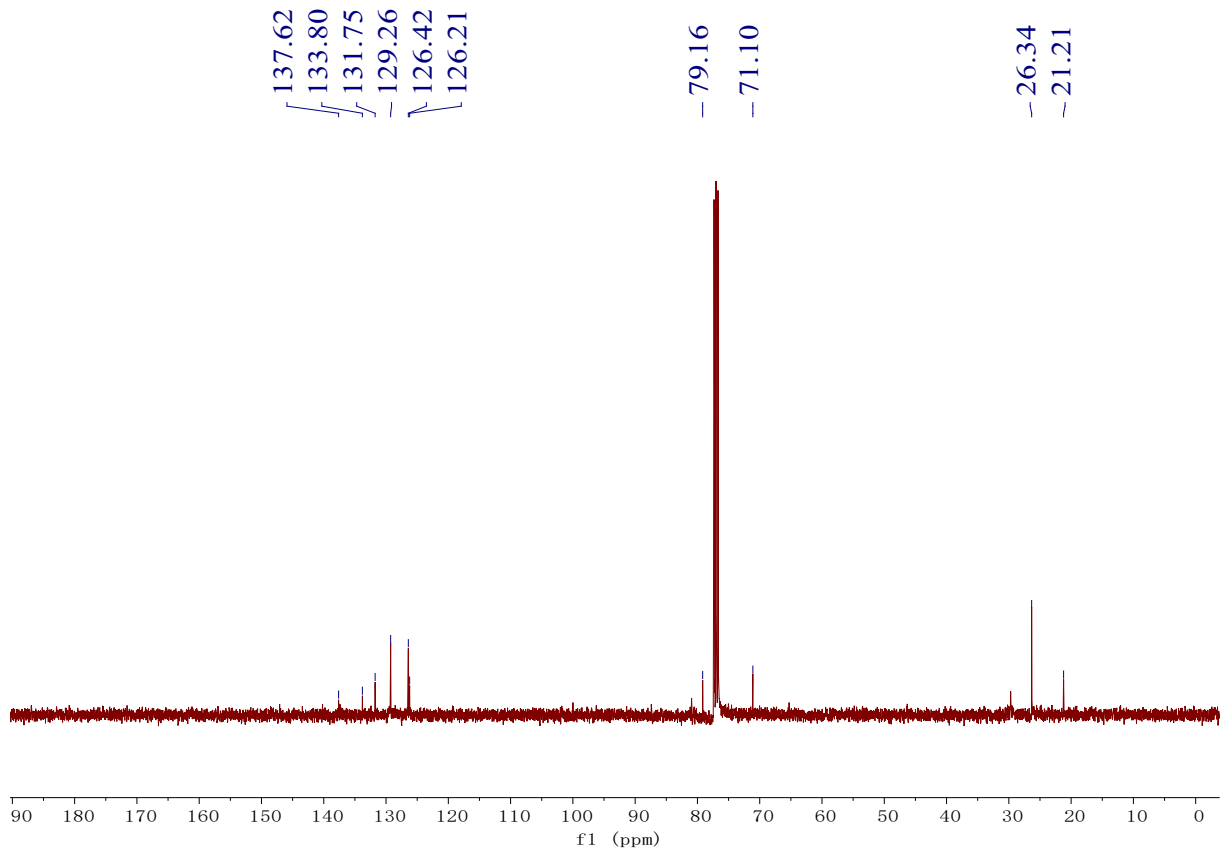

5d

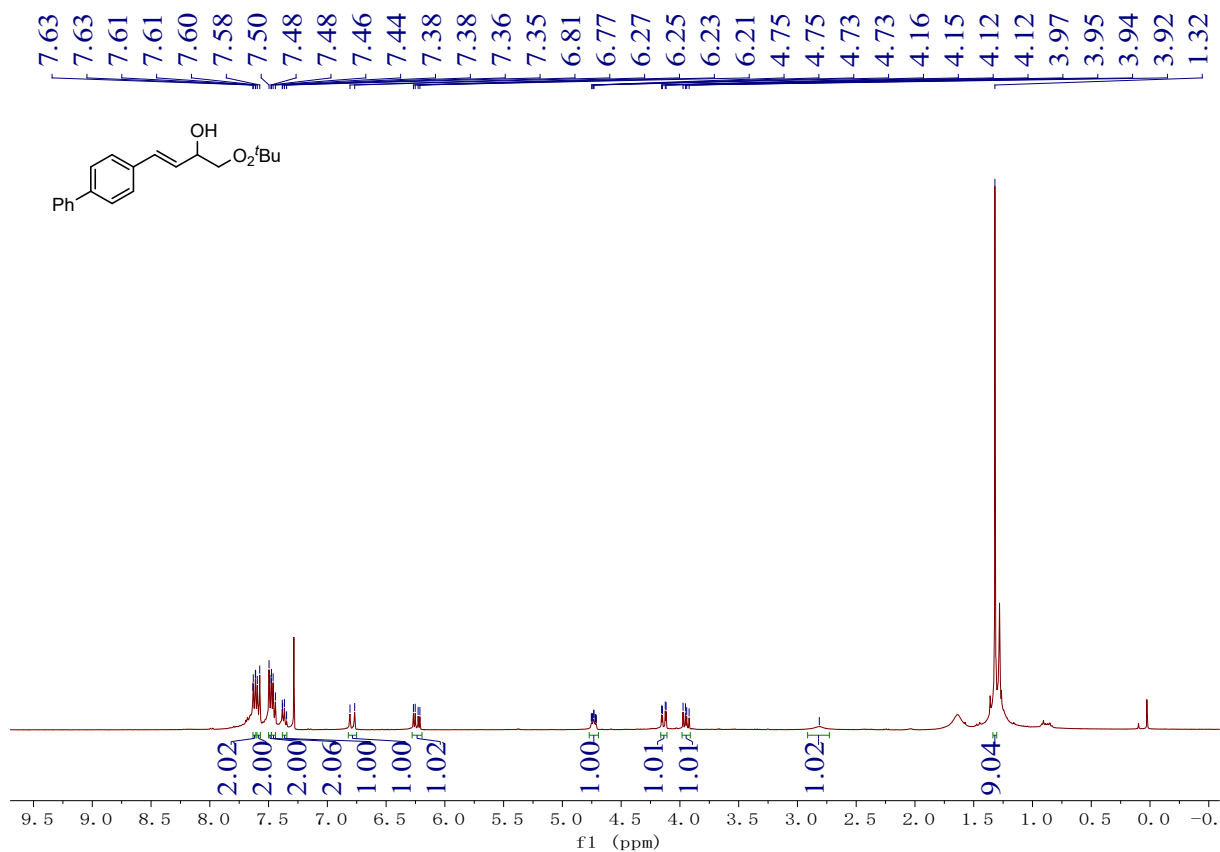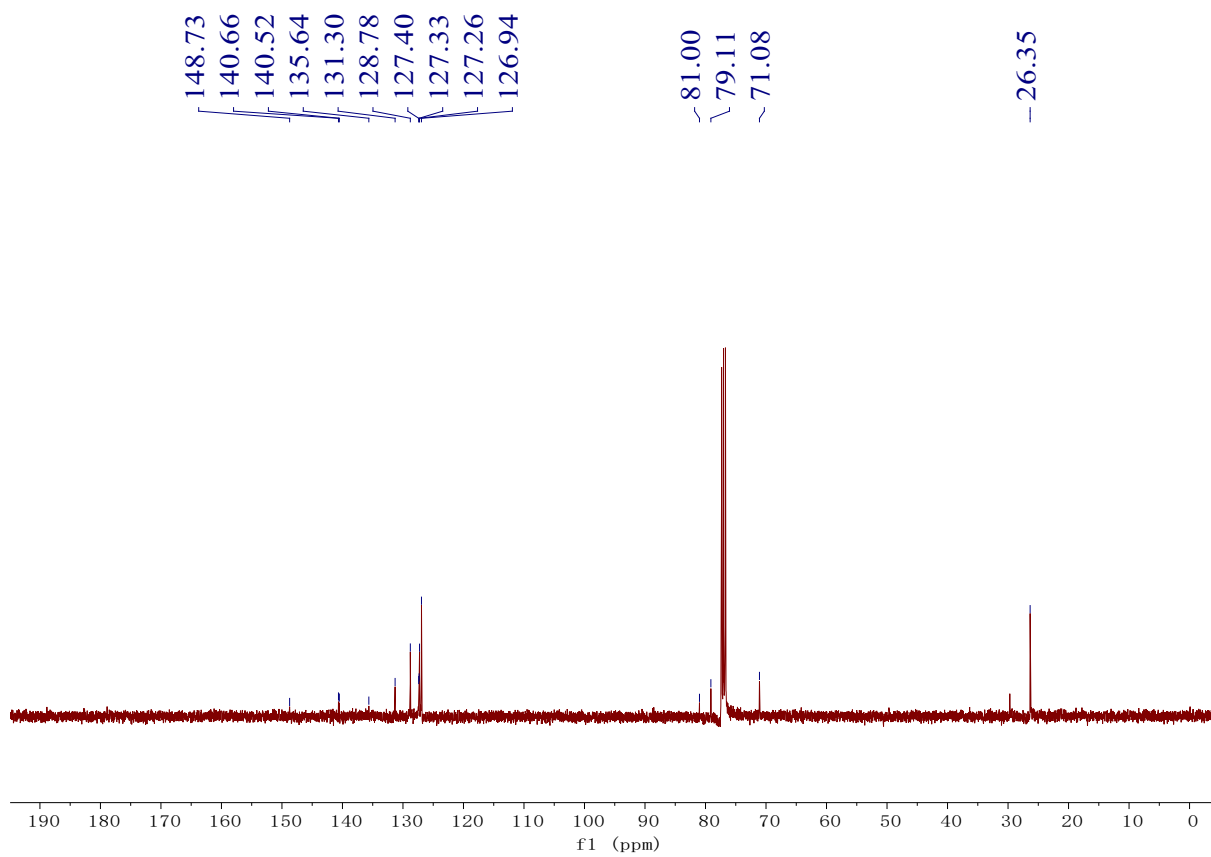

5e

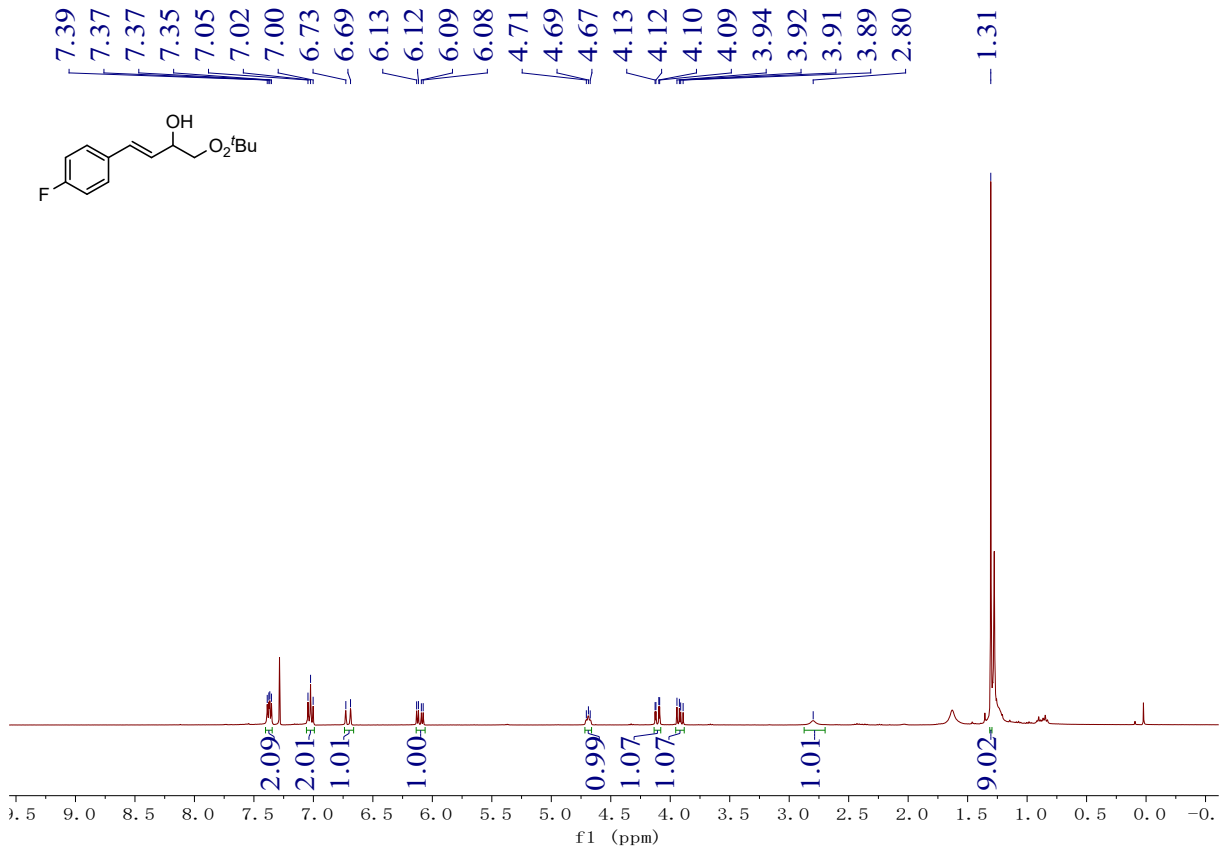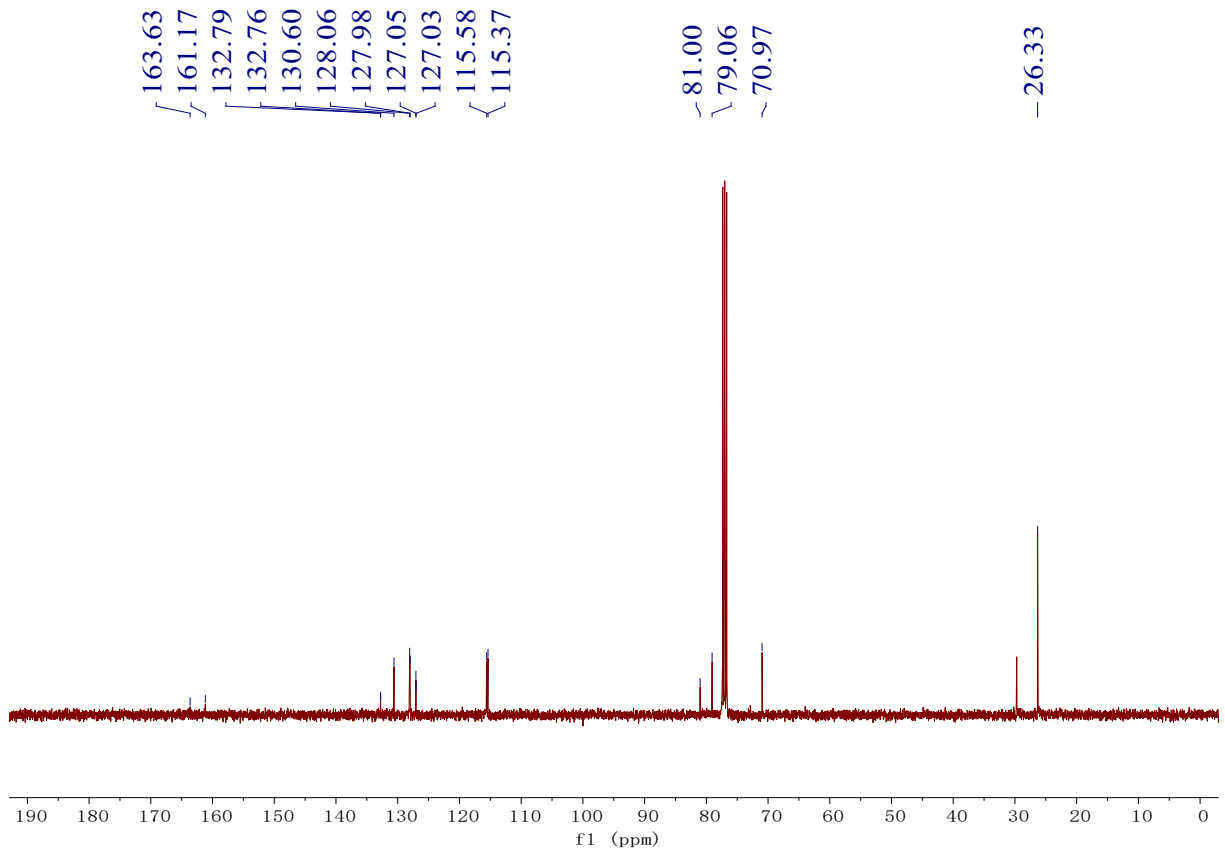

5f

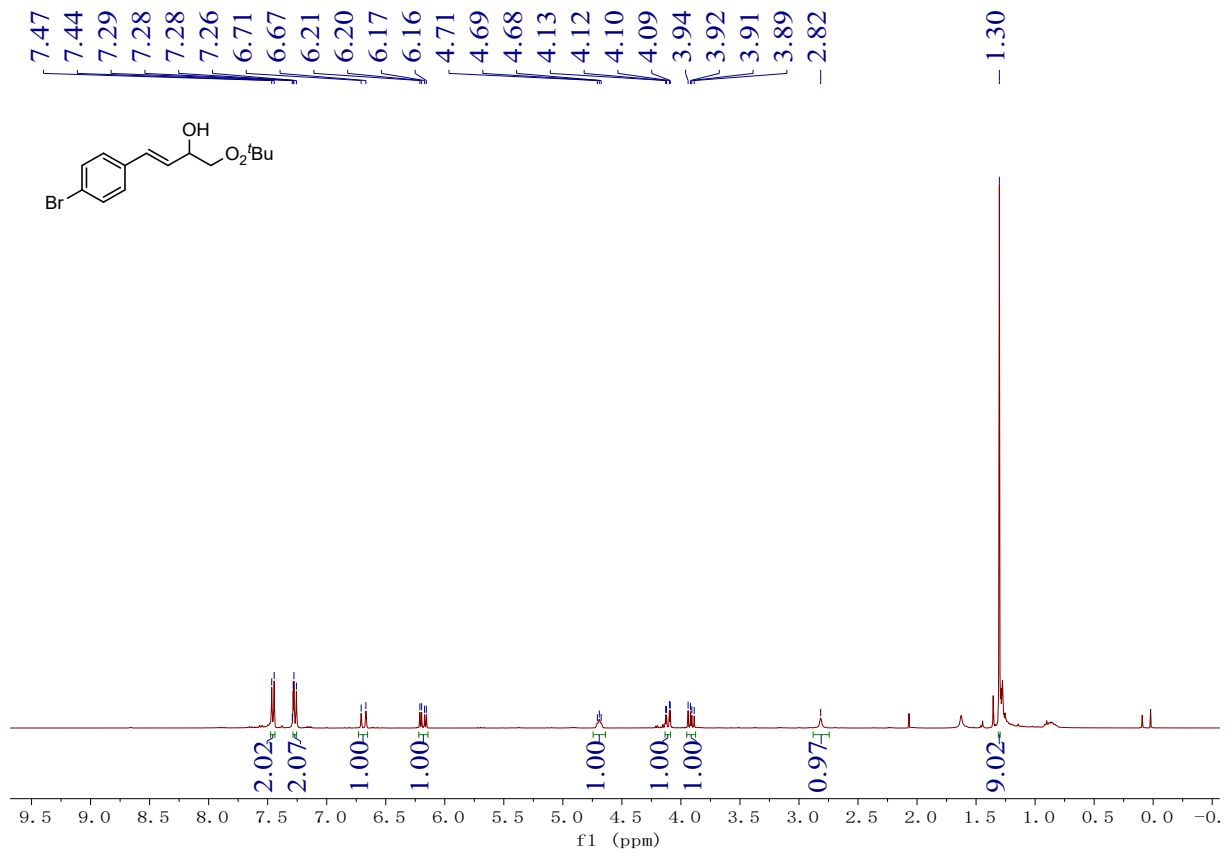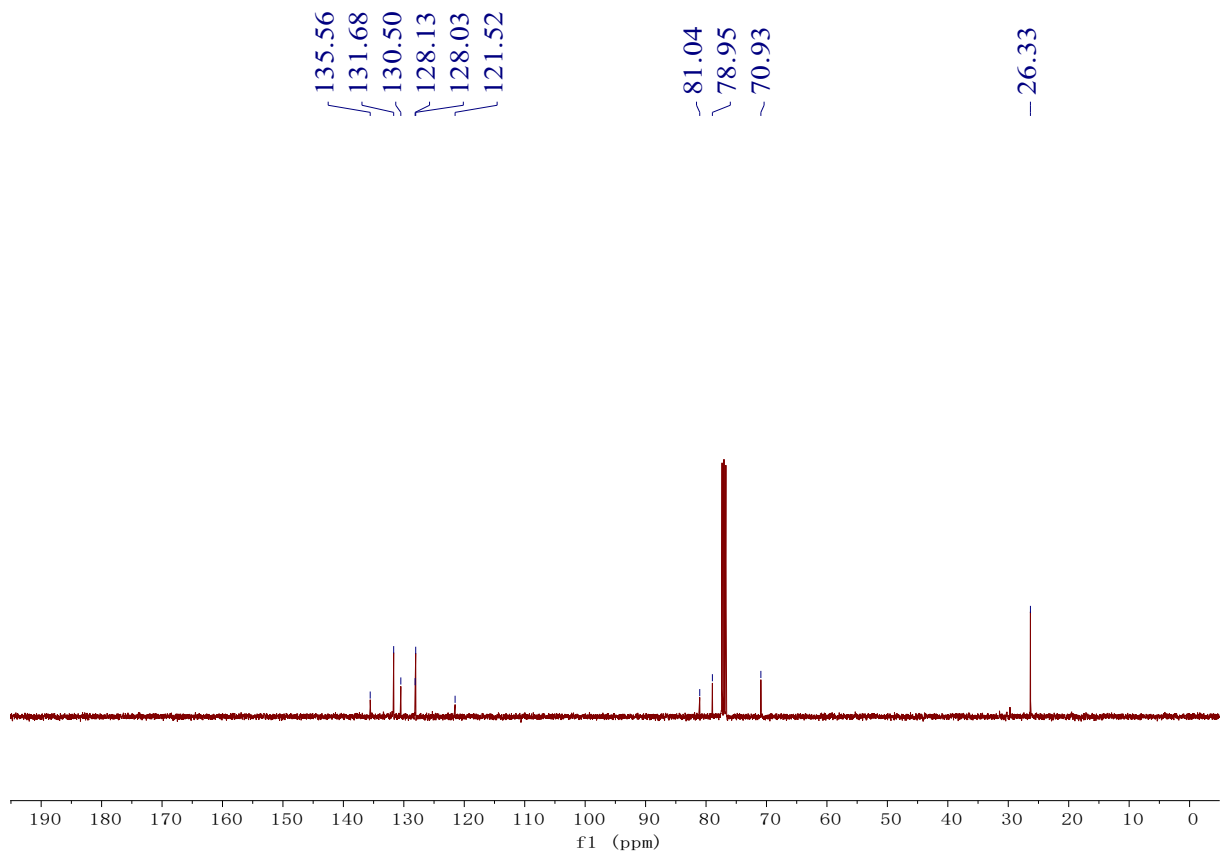



5g

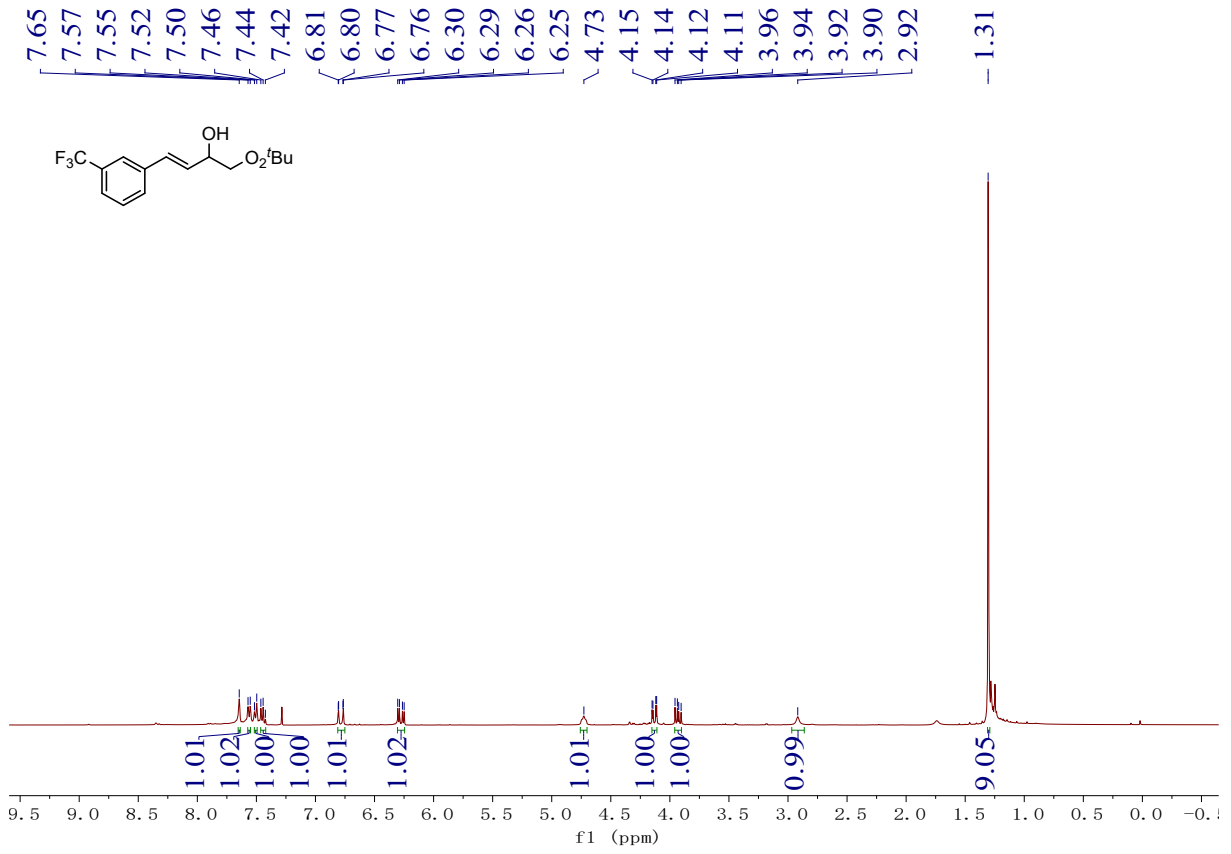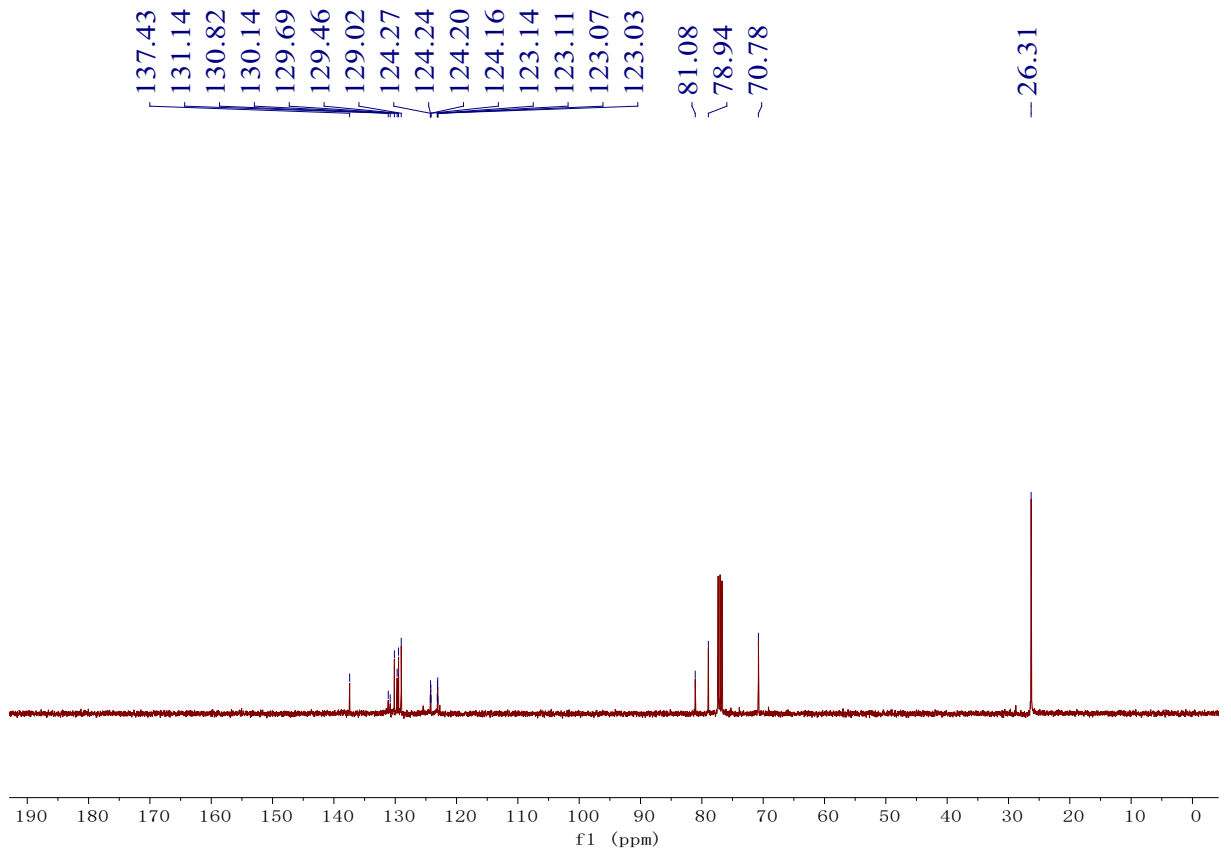

5h

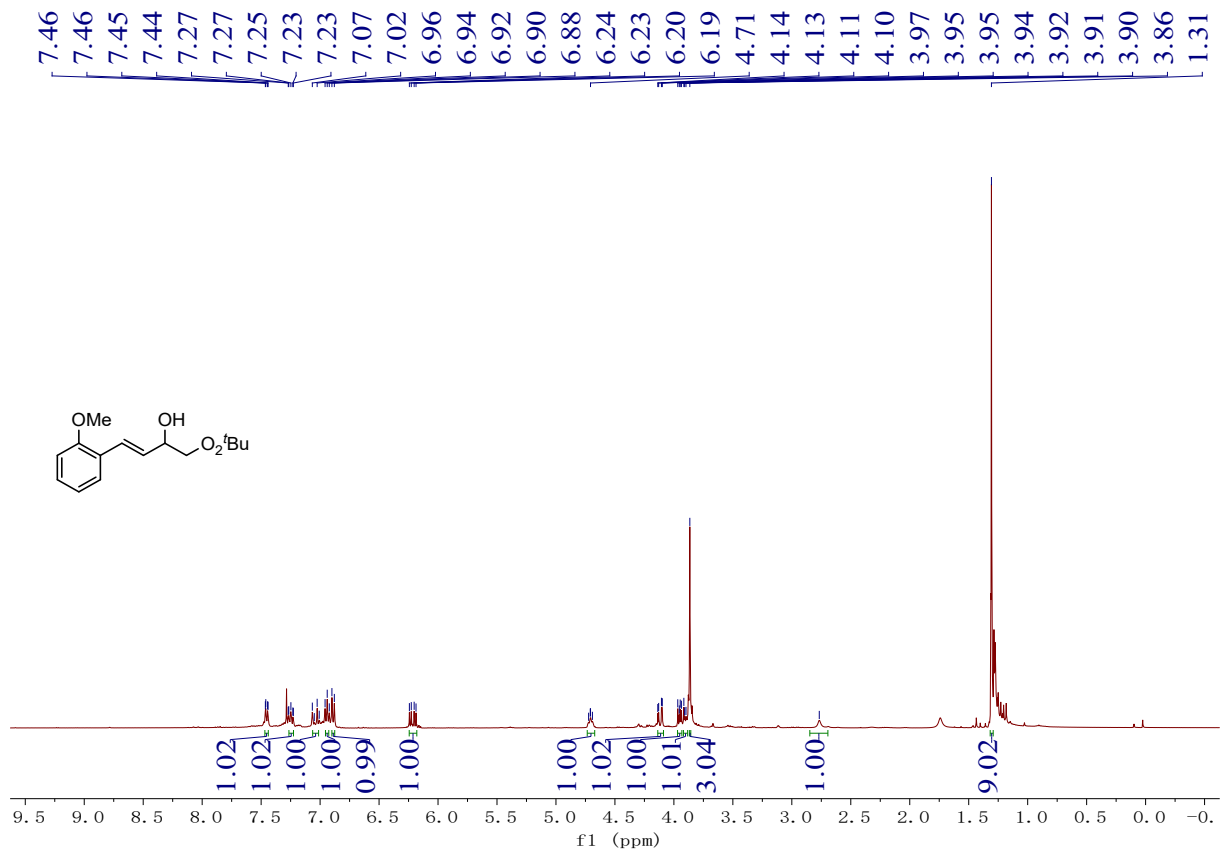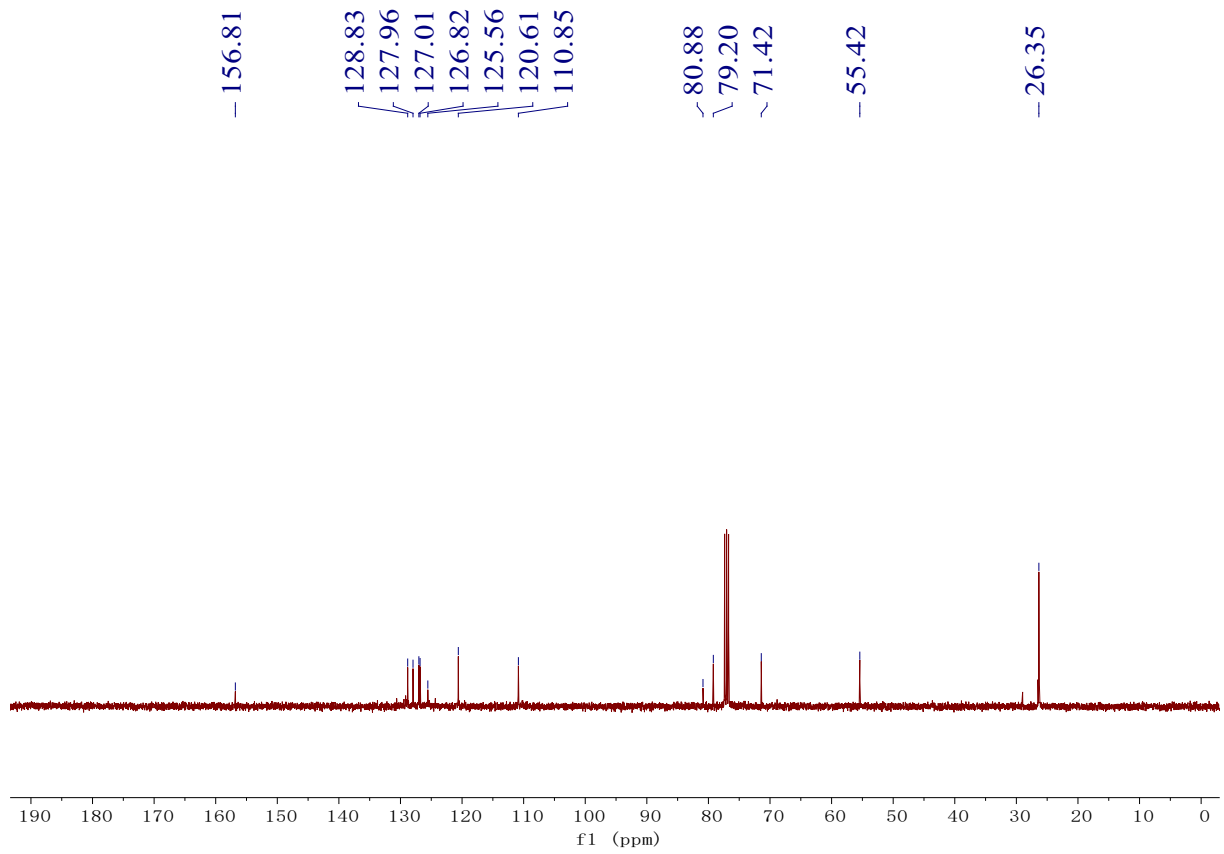

5i

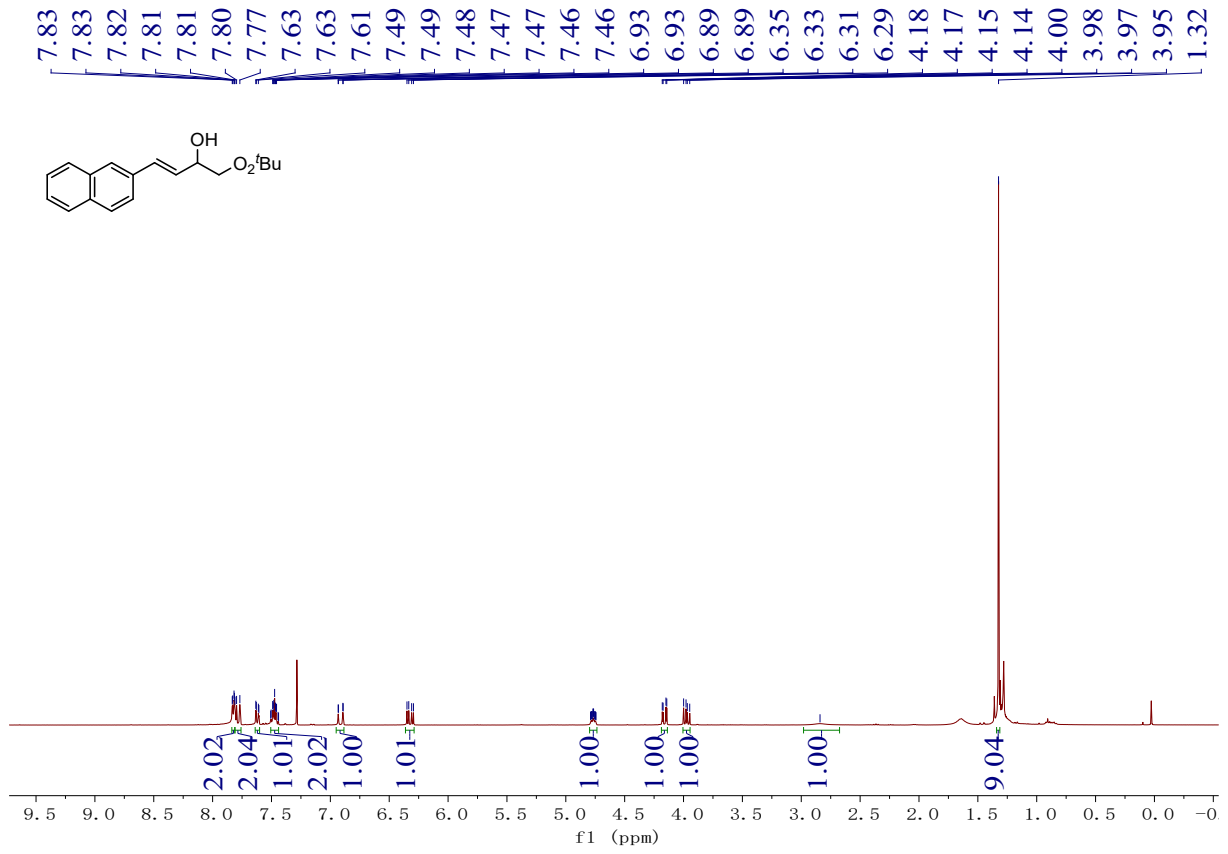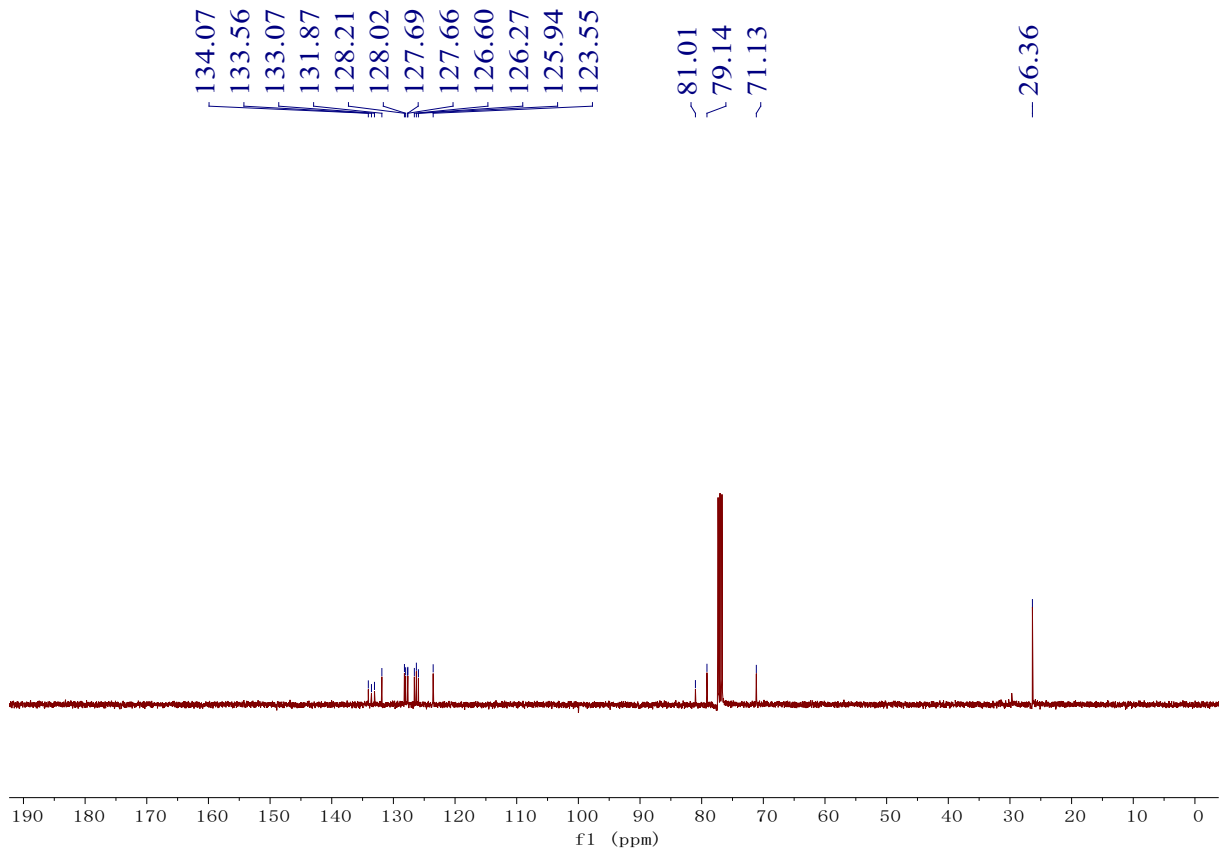

5j

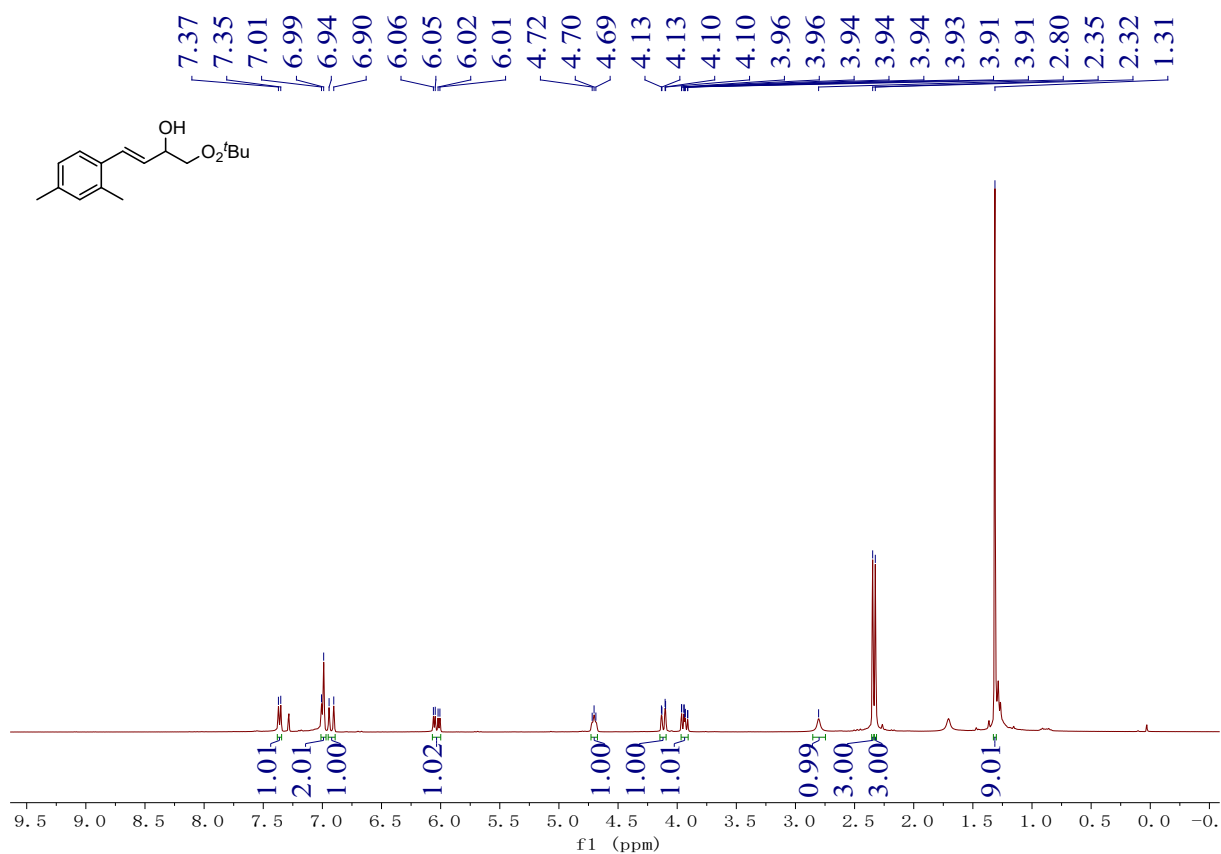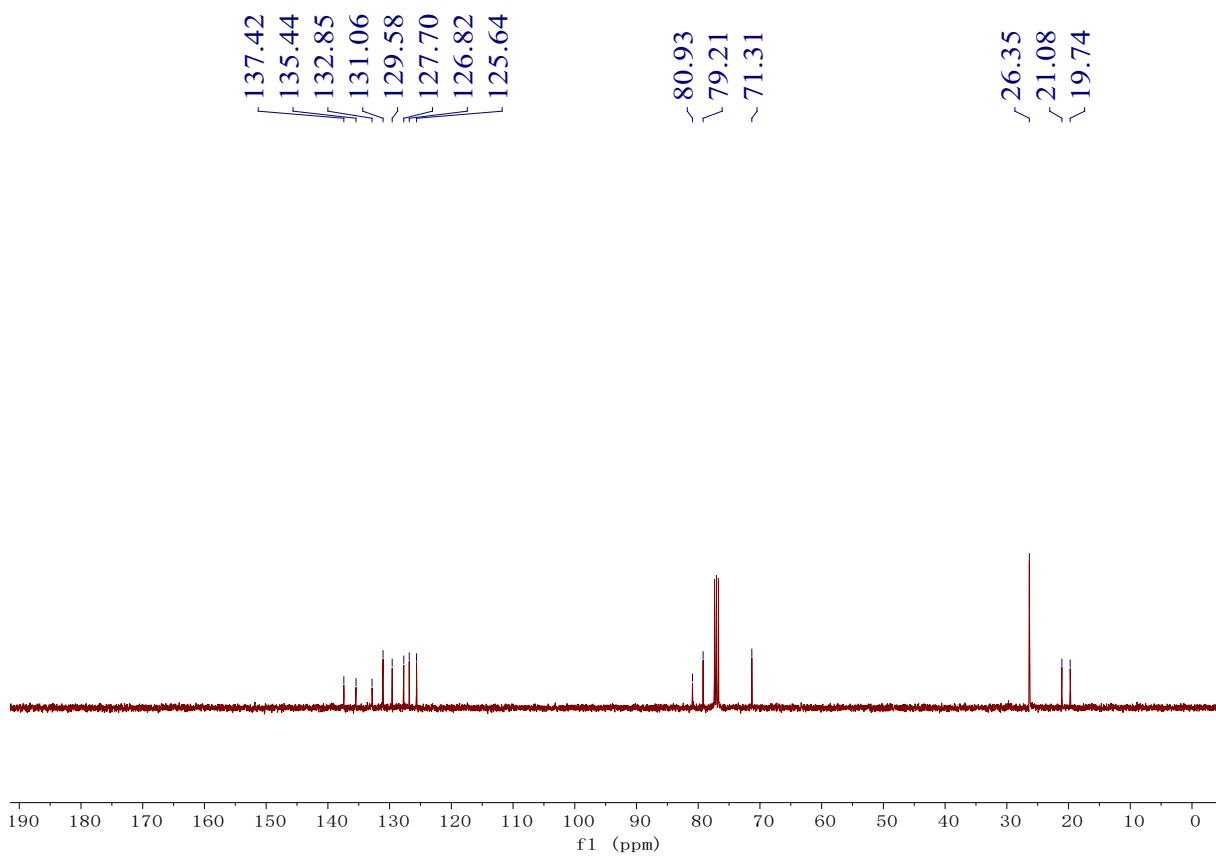

5k

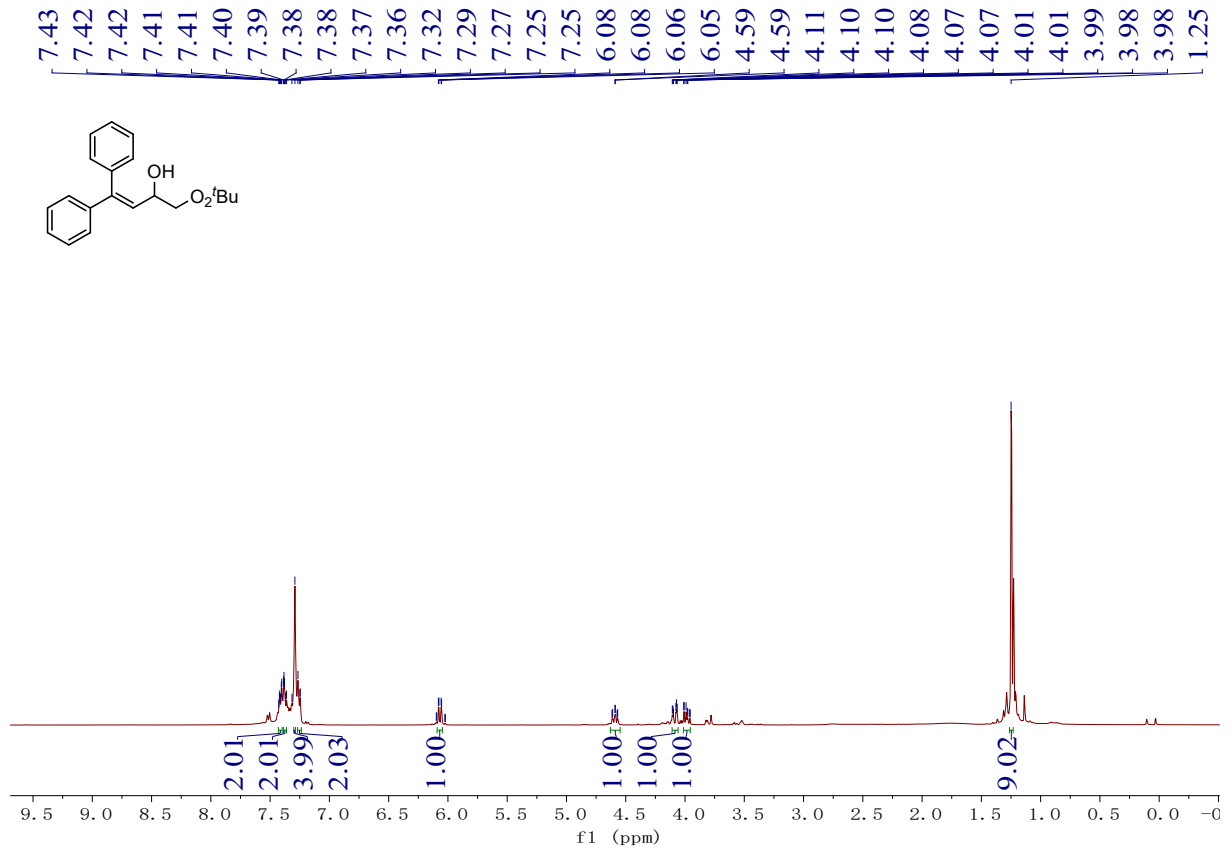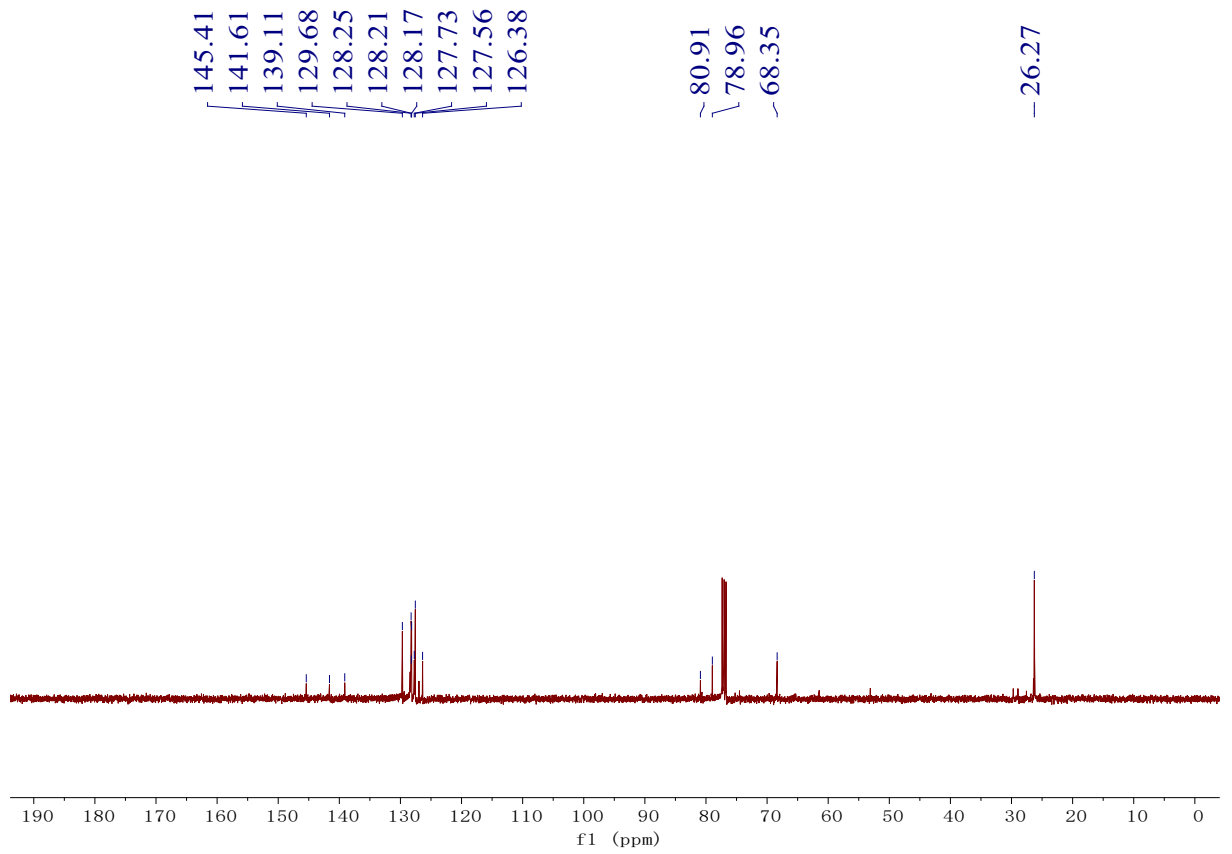

51

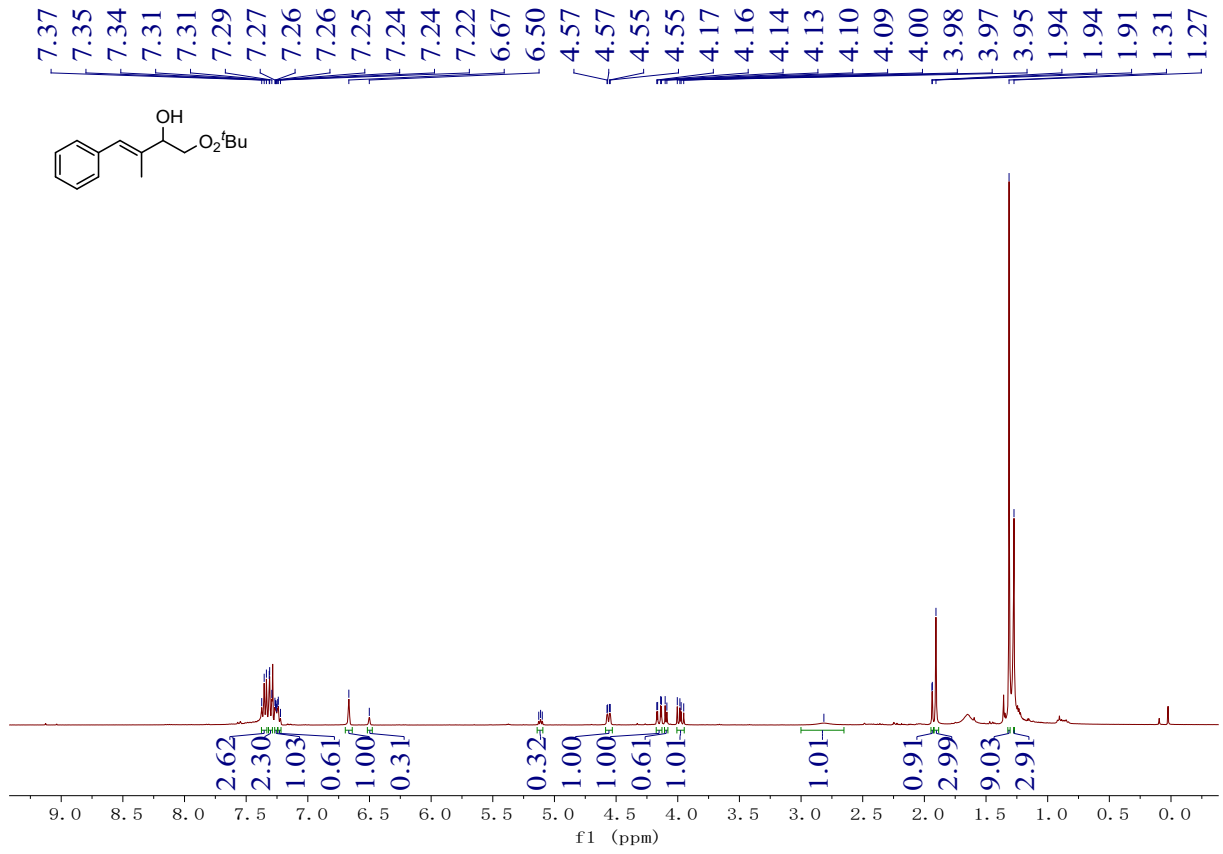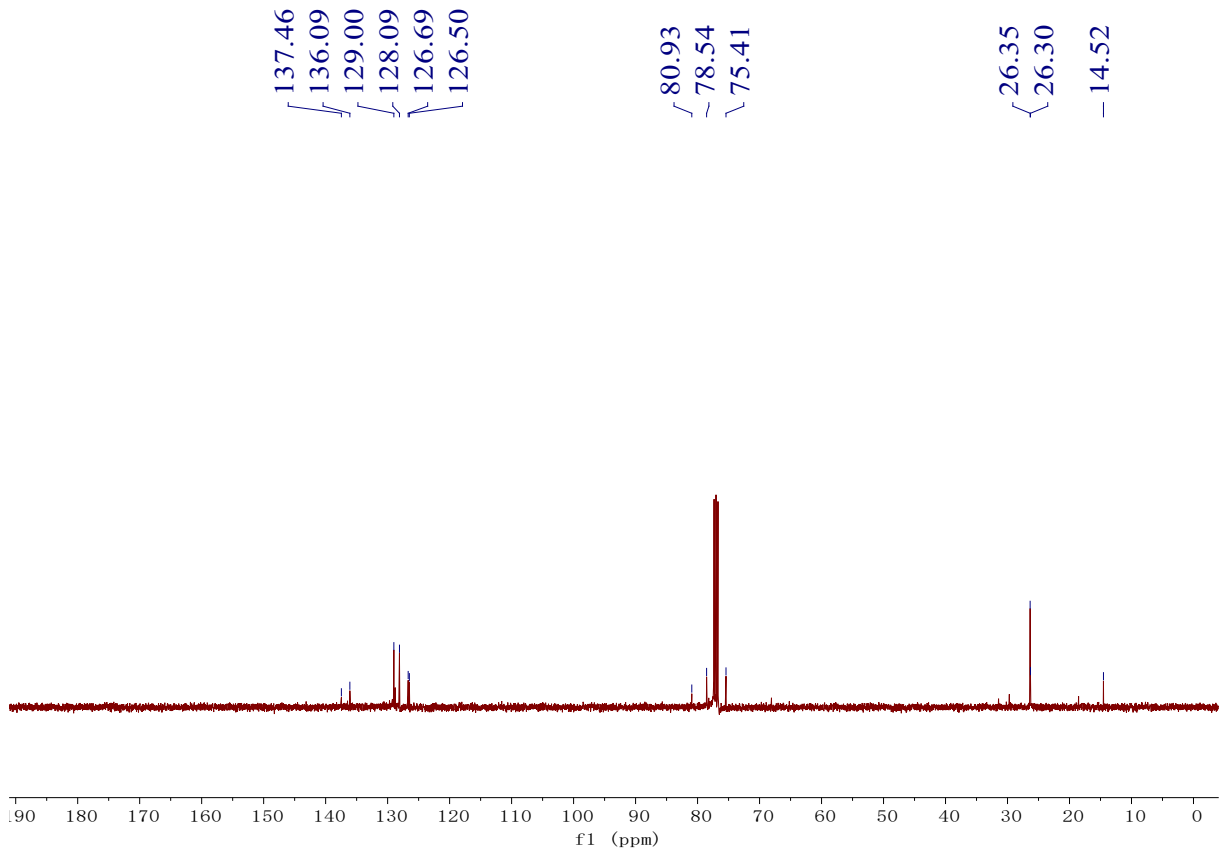

50

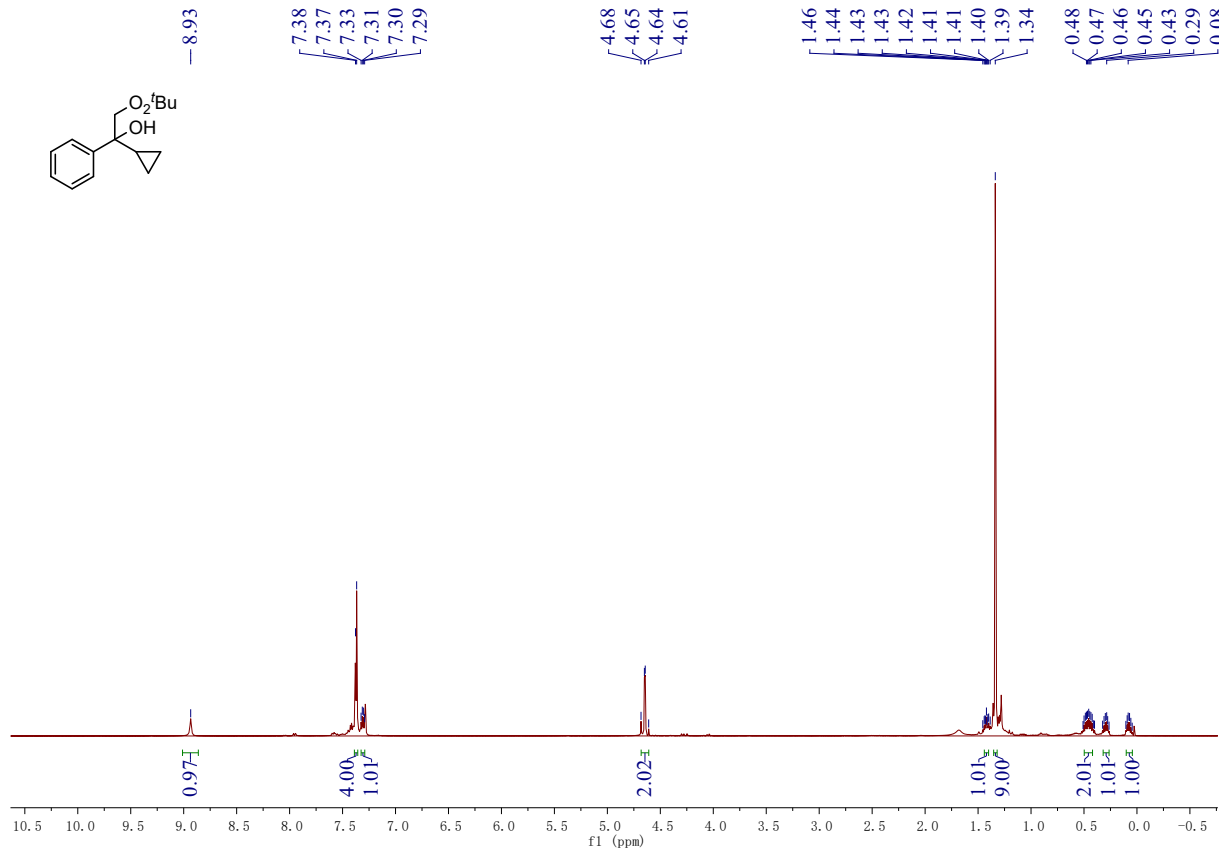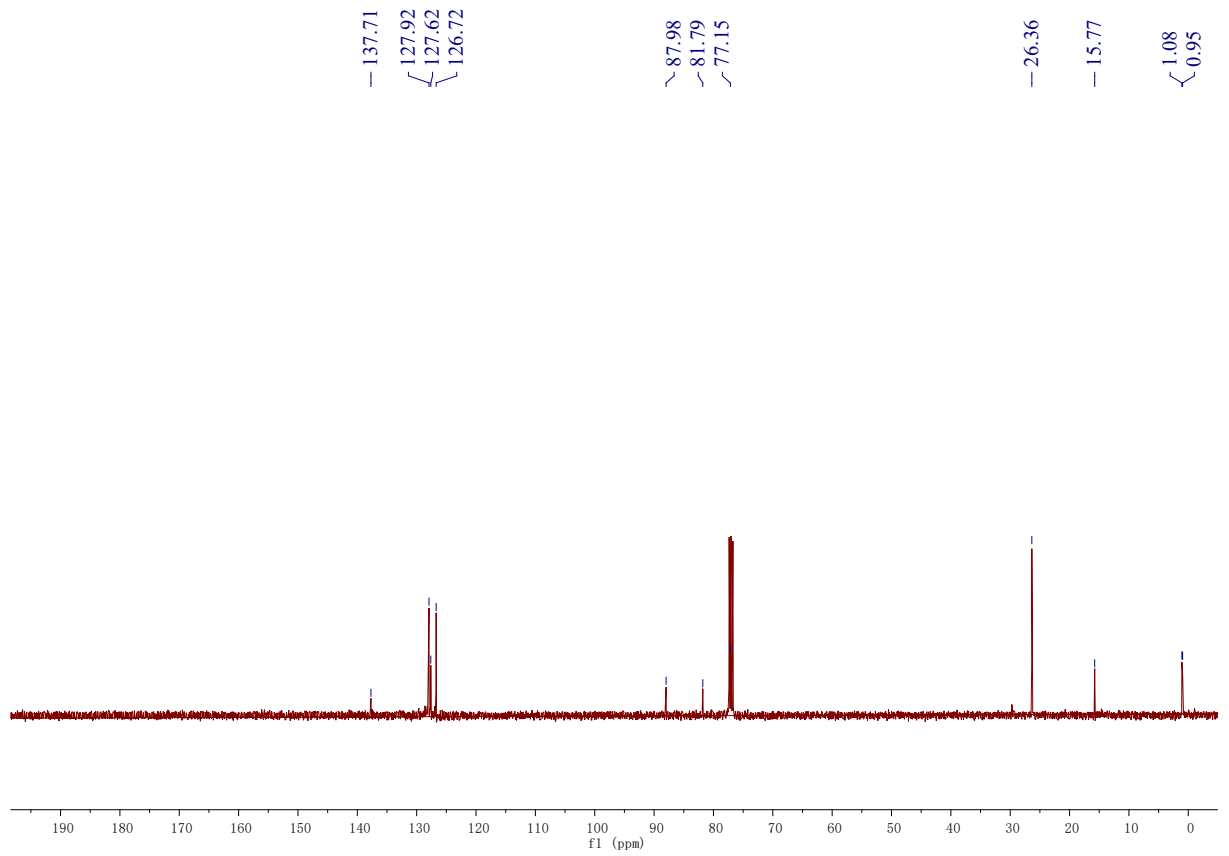

6a

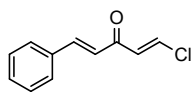

7.68  
7.64  
7.58  
7.57  
7.56  
7.44  
7.42  
7.42  
7.40  
6.91  
6.88  
6.87  
6.83

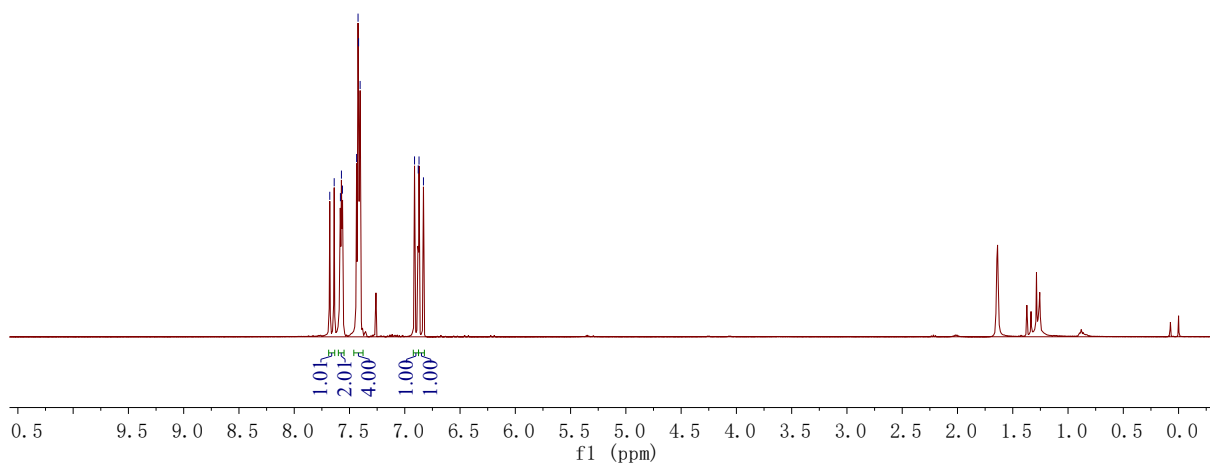

186.38

144.62  
137.04  
134.29  
131.08  
130.94  
129.05  
128.50  
124.87

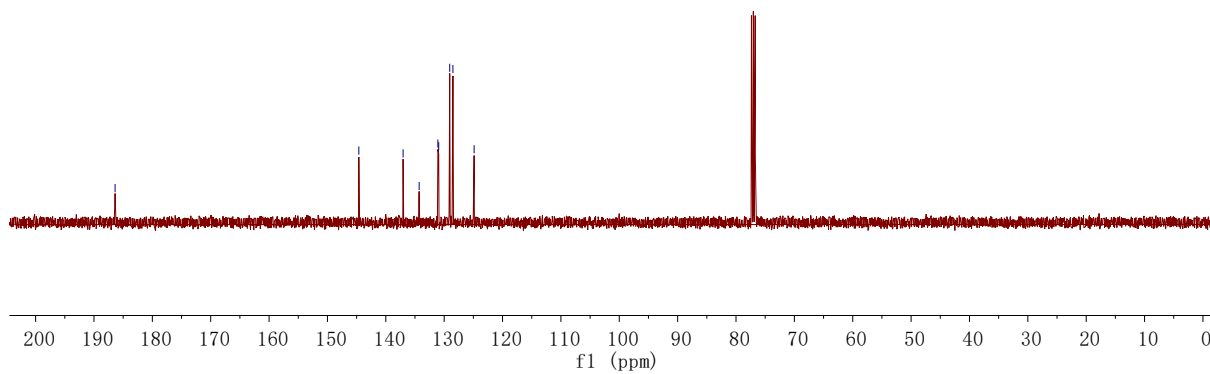

Supplement: d3cc02337k1.pdf [file d3cc02337k1.pdf]
